# Supplementary material
Source: Research Square preprint supplement (doi:10.21203/rs.3.rs-8695625/v1)
Supplement: Supplementary file 1 [file 2d9186d0f87e6f7f9fa1afe3.xlsx]

## Sheet: Appendix A
Appendix A. The phenotypic data and BLUP values of 371 maize inbred lines used in this study.
ID	Line	LL_22YY	LW_22YY	RLW_22YY	LL_22ZY	LW_22ZY	RLW_22ZY	LL-11HB	LW-11HB	RLW-11HB	LL-12HB	LW-12HB	RLW-12HB	LL_BLUP	LW_BLUP	RLW_BLUP	Subpopulation	Origin
1	150	66.5	8.08333	8.30789	51.8333	8.75	5.93664	52	8.33333	6.24	59.2	9.34	6.33833	63.1359	8.73942	7.2475	China	Mixed
2	177	73	6.95	10.5024	82.6667	8.36667	9.94547	83.6667	9	9.2963	80	8.06	9.92556	82.2555	8.29362	10.0313	China	Mixed
3	268	72.6667	8.4	8.65386	70.6667	9.73333	7.30497	74.3333	9.33333	7.96429	70.4	9.06	7.77042	75.5985	9.16419	8.2982	China	NSS
4	501	63.5	8.11667	7.82149	64	8	8.02876	70.6667	9.33333	7.57143	70.2	8.975	7.82173	71.4045	8.7247	8.20288	China	NSS
5	647	70.3333	7.66667	9.16974	62.6667	8.03333	7.89057	54.3333	5.16667	10.5161	76.25	7.44	10.2487	70.3848	7.43776	9.63054	China	Mixed
6	812	68.8333	7.75	8.88859	71.1667	9.56667	7.45215	79	6.66667	11.85	75.6	8.92	8.47534	76.9886	8.40507	9.37924	China	SS
7	1323	65.6667	11.8333	5.5585	69	12.5	5.52	78	11.1667	6.98507	72.2	11.65	6.19742	74.9172	11.3995	6.6929	China	Mixed
8	1462	74.5	7.13333	10.4299	66	7.83333	8.44626	93	9	10.3333	90.8	9.82	9.24644	83.3115	8.58801	9.76702	China	NSS
9	3411	82.3333	8.53333	9.64286	74.1667	10.3167	7.21472	81.3333	9	9.03704	78.2	9.26	8.44492	81.5509	9.28826	8.8723	China	Mixed
10	4019	55	7.73333	7.11207	NA	NA	NA	70	8.66667	8.07692	73.6	7.88	9.3401	69.7806	8.40911	8.30565	China	NSS
11	5213	67.6667	6.81667	9.9878	71.6667	8.6	8.33534	80.6667	9.16667	8.8	79.4	8.82	9.00227	78.0126	8.51021	9.26225	China	Mixed
12	5311	73.1667	7.18333	10.1988	78.3333	7.81667	10.0198	84.3333	9.16667	9.2	68.4	8.42	8.12352	79.0388	8.33778	9.56771	China	NSS
13	7327	76.1667	9.73333	7.82142	70.1667	9.66667	7.29405	79	9.33333	8.46429	79.6	9.44	8.4322	79.1899	9.51116	8.36753	China	NSS
14	7381	69.3333	8.05	8.60864	73	9.75	7.52075	57.6667	8	7.20833	72	9.56	7.53138	72.1773	8.92026	8.12272	China	NSS
15	8902	52.3333	6.8	7.69608	64	9.4	6.80887	68.3333	8.16667	8.36735	64	8.68	7.37327	67.2085	8.43451	7.98841	China	Mixed
16	9642	76.8333	9.63333	7.99377	77	10.5	7.32596	83.3333	10.1667	8.19672	82	10.46	7.83939	82.2172	10.0558	8.22888	China	Mixed
17	9782	54	8.65	6.2351	48.3333	6.36667	7.66498	72.6667	10.1667	7.14754	65	9.52	6.82773	65.3649	8.78358	7.47497	China	NSS
18	526018	68.8333	7.95	8.66473	74.1667	9.56667	7.75833	76	8	9.5	74.6	9.04	8.25221	76.7758	8.75203	8.83764	China	NSS
19	04K5672	67.8333	6.4	10.6058	60.3333	8.03333	7.7402	NA	NA	NA	73.8	7.1	10.3944	72.7554	7.61291	9.78003	China	Mixed
20	04K5686	78.8333	6.48333	12.1796	67.5	7.38333	9.15806	75	7.06667	10.6132	79.8	6.7	11.9104	78.3788	7.29477	10.9369	China	Mixed
21	04K5702	57.1667	6.45	8.85568	66.6667	8.21667	8.21144	72.3333	9.83333	7.35593	70.6	8.02	8.80299	71.0639	8.32306	8.63399	China	NSS
22	05WN230	77.8333	9.2	8.49747	72	9.88333	7.28262	84.6667	8.6	9.84496	81.4	9.68	8.40909	81.5232	9.34083	8.80731	China	Mixed
23	07KS4	68.3333	7.95	8.58533	70.1667	8.78333	7.98695	81.6667	9.5	8.59649	79.6	10.04	7.92829	78.0893	9.11162	8.608	China	NSS
24	18-599	70.8333	7.16667	9.8411	79.5	8.4	9.58925	83.3333	6.5	12.8205	86.8	7.42	11.6981	82.494	7.6859	10.9564	China	NSS
25	303WX	59.1667	6.1	9.69912	59.5	8.13333	7.34984	68	7.83333	8.68085	73.8	8.88	8.31081	69.7227	7.99081	8.80947	China	Mixed
26	384-2	83.5	11.8833	7.04238	74.6667	10.1	7.39274	87.6667	11	7.9697	83	11	7.54545	84.278	10.7329	7.92342	China	Mixed
27	3H-2	75.5	8.05	9.37935	73.3333	9.33333	7.87995	74.6667	10.3333	7.22581	76.4	8.875	8.60845	78.117	9.17891	8.60583	China	Mixed
28	4F1	70.3333	7.55	9.31725	64.6667	9.08333	7.12277	73.6667	8.83333	8.33962	73.6	7.74	9.50904	74.3637	8.46605	8.86363	China	NSS
29	7884-4HT	68.6667	6.98333	9.8875	60	8.88333	6.76771	82	6.5	12.6154	85.8	7.16	11.9832	77.3867	7.69221	10.3736	China	Mixed
30	835A	66.8333	7.45	8.95788	66	8.83333	7.46993	70.3333	7.33333	9.59091	69	8.02	8.60349	72.2114	8.1359	8.93512	China	NSS
31	835B	60.8333	8.75	6.95133	70.8333	9.78333	7.23909	66	9.83333	6.71186	64.2	9.16	7.00873	70.0186	9.37447	7.48147	China	NSS
32	975-12	66.3333	8.95	7.47954	71	9.98333	7.12284	84	9.86667	8.51351	64.2	10.54	6.09108	75.0577	9.75719	7.76094	China	Mixed
33	A619	58.8333	6.51667	9.10734	66.1667	9.16667	7.21607	68	7.66667	8.86957	66	7.76	8.50515	69.4098	8.02866	8.73798	USA	NSS
34	AF	72.5	8.31667	8.80152	62	9.85833	6.28651	NA	NA	NA	NA	NA	NA	74.5411	9.20371	8.22359	NA	NA
35	AW	65.3333	8.35	7.82516	72.6667	8.95	8.16564	NA	NA	NA	NA	NA	NA	75.8388	8.88435	8.57146	NA	NA
36	B11	76	8.05	9.44478	87	8.2	10.6098	84.6667	8.53333	9.92188	81	8.12	9.97537	84.2418	8.40296	10.0898	China	TST
37	B110	68.6667	7.6	9.03963	74.8333	9.53333	7.91348	78	7.5	10.4	82	8.7	9.42529	78.8834	8.49339	9.40307	China	SS
38	B111	68.5	6.86667	10.0238	63.3333	7.61667	8.25703	72	8.16667	8.81633	77	7.76	9.92268	74.0572	7.88146	9.45506	China	Mixed
39	B113	68.8333	7.96667	8.63815	66.3333	9.25	7.2093	77	9.83333	7.83051	74.4	9.56	7.78243	75.277	9.18311	8.25054	China	Mixed
40	B114	65	7.13333	9.11215	70	9.71667	7.19423	80.6667	10	8.06667	72.6	8.2	8.85366	75.6411	8.85507	8.63183	China	NSS
41	B77	73.6667	8.16667	9.02041	69.1667	8.51667	8.11991	78	8.66667	9	76.8	8.72	8.80734	77.6358	8.6511	9.00662	China	Mixed
42	BF	81.6667	9.21667	8.85801	68.6667	10.6833	6.41909	NA	NA	NA	NA	NA	NA	80.4137	9.82792	8.29622	NA	NA
43	BGY	62	4.91667	12.6221	57.1667	5.1	11.2108	65.3333	7	9.33333	67.2	6.38	10.5329	67.8557	6.40527	10.9	China	Mixed
44	BW	74	8.5	8.70588	66	9.26667	7.1223	NA	NA	NA	NA	NA	NA	76.5802	9.05492	8.50647	NA	NA
45	BY4839	67.8333	7.68333	8.82019	63.5	9.15	6.91919	76.6667	9.33333	8.21429	75.4	9.14	8.24945	74.6043	8.90764	8.41086	China	NSS
46	BY4944	69	8.3	8.31325	71	9.31667	7.68495	81.3333	10.3333	7.87097	81.5	10.28	7.92802	78.7407	9.52377	8.32203	China	NSS
47	BY4960	66	7.41667	8.90744	60.8333	9.11667	6.66071	81	9.73333	8.32192	76.8	9.24	8.31169	74.8661	8.9518	8.41086	China	NSS
48	BY804	68	8.03333	8.5799	69.8333	9.95	7.01044	73.3333	8.66667	8.46154	72.6	8.88	8.17568	74.6809	8.95601	8.41735	China	NSS
49	BY809	63	8.41667	7.48745	55.8333	9.98333	5.61248	68.6667	11	6.24242	68.4	9.7	7.05155	68.7498	9.70672	7.15218	China	NSS
50	BY813	61.5	9.48333	6.49471	62.8333	10.6667	5.88815	66.6667	11.9333	5.58659	66.6	11.38	5.85237	69.1117	10.6236	6.59541	China	NSS
51	BY815	64	9.33333	6.85863	57.6667	10.0333	5.74823	72.3333	9.66667	7.48276	69.4	11.875	5.84421	70.3465	10.0873	7.05252	China	NSS
52	BY843	65.8333	10.8167	6.08632	62.8333	10.75	5.85571	73.6667	11	6.69697	71.2	10.78	6.60482	72.5031	10.6004	6.90521	China	NSS
53	BY855	65.3333	8.86667	7.39373	60	10.5833	5.66965	71.6667	10.5	6.8254	71	10.58	6.71078	71.3258	10.0074	7.19767	China	NSS
54	C8605	56.1667	7.18333	7.81848	59	9.21667	6.41433	61	8.16667	7.46939	60.8	8.34	7.29017	64.7198	8.40507	7.71544	China	NSS
55	CA47	73.6667	7.3	10.0913	68.3333	8.36667	8.17319	NA	NA	NA	69	7.9	8.73418	75.2005	8.15612	9.29606	China	Mixed
56	CF3	66	6.96667	9.47164	65.3333	9.91667	6.58806	72.3333	10.5	6.88889	74.4	10.26	7.25146	73.4674	9.40181	7.97758	China	Mixed
57	CHANG7-2	70	8.93333	7.83431	67.1667	9.56667	7.02331	72.6667	9	8.07407	75.8	9	8.42222	75.0812	9.15998	8.22455	China	Mixed
58	CHENG698	71	8.36667	8.48721	68.3333	9.08333	7.64833	76.3333	10.5	7.26984	74.8	10.48	7.1374	76.1073	9.56583	8.0534	China	Mixed
59	CHUAN48-2	62.3333	8.7	7.15657	60.8333	11.45	5.31546	71.6667	8.66667	8.26923	72	9.82	7.33198	71.0767	9.60999	7.5183	China	Mixed
60	CI7	80.6667	7.5	10.7556	79.3333	8.58333	9.24694	87.6667	7.16667	12.2326	84.4	8.28	10.1932	84.9656	8.11488	10.6271	USA	Mixed
61	CIMBL1	66	8.75	7.55229	69.5	10.25	6.79912	66.6667	9.83333	6.77966	73	9.56	7.63598	72.8522	9.55742	7.66778	USA	NSS
62	CIMBL10	83	7.33333	11.3168	75.1667	8.81667	8.53822	97	6.76667	14.335	90.2	7.54	11.9629	87.797	7.88987	11.433	CIMMYT	TST
63	CIMBL101	70.1667	8.1	8.6785	71.3333	11.2667	6.33136	80.3333	8.93333	8.99254	83.2	9.975	8.34085	79.2091	9.53429	8.44119	CIMMYT	TST
64	CIMBL102	72.5	8.33333	8.70308	67	9.51667	7.03835	74	9.83333	7.52542	71.2	10.22	6.96673	74.881	9.45438	7.98624	CIMMYT	TST
65	CIMBL105	84.6667	8.83333	9.58761	78.6667	8.91667	8.82376	93.6667	9.2	10.1812	88.4	10	8.84	87.8056	9.25461	9.54388	CIMMYT	TST
66	CIMBL106	81.1667	7.91667	10.2523	82.3333	9.15	9.02151	79	6.83333	11.561	88	8.78	10.0228	84.6314	8.3567	10.2848	CIMMYT	TST
67	CIMBL111	66.8333	9.53333	7.02897	67.6667	11.65	5.80611	69.3333	9.73333	7.12329	66.2	9.5	6.96842	71.7579	9.98219	7.26916	CIMMYT	TST
68	CIMBL113	80.6667	8.66667	9.34524	94	9.5	9.89474	89.3333	9.23333	9.67509	84.8	10.74	7.89572	88.5273	9.50485	9.41173	CIMMYT	TST
69	CIMBL115	82.1667	8.75	9.39216	90	8.83333	10.223	84	10	8.4	75.4	11.24	6.70819	84.8592	9.64784	8.95679	CIMMYT	TST
70	CIMBL119	84	8.9	9.67142	81.5	7.76667	10.5234	88.3333	7.33333	12.0455	83.4	7.76	10.7474	86.0641	8.16324	10.7484	CIMMYT	TST
71	CIMBL12	76.1667	10.4667	7.30739	73.6667	9.06667	8.125	67.3333	10.3333	6.51613	59	10.56	5.58712	73.0651	9.9864	7.40348	CIMMYT	TST
72	CIMBL121	73	8.35	8.76434	84.8333	8	10.6051	86.3333	7.16667	12.0465	88.75	8.65	10.2601	85.1444	8.24946	10.4646	CIMMYT	TST
73	CIMBL123	66.5	7.01667	9.48066	73.6667	8.9	8.30231	83.6667	9.53333	8.77622	NA	NA	NA	78.5438	8.68881	9.12139	CIMMYT	TST
74	CIMBL124	72.8333	8.46667	8.60549	85.5	7.45	11.4765	72.6667	8.83333	8.22642	73.4	10.64	6.8985	79.075	8.92657	9.06511	CIMMYT	TST
75	CIMBL127	70	9.6	7.29628	69.6667	10.4667	6.65605	68	8.33333	8.16	72.6	9.36	7.75641	73.9379	9.42494	7.90825	CIMMYT	TST
76	CIMBL129	65.3333	7.91667	8.25482	71	9.73333	7.29379	77.6667	8.9	8.72659	74.8	9.88	7.57085	75.7539	9.14526	8.33287	CIMMYT	Mixed
77	CIMBL130	72.3333	8.51667	8.51261	68	8.28333	8.20748	NA	NA	NA	NA	NA	NA	76.7026	8.70289	8.84669	CIMMYT	TST
78	CIMBL133	61.5	7.73333	7.9425	56.1667	8.61667	6.45011	65	8.26667	7.8629	51.4	7.74	6.64083	64.1024	8.28941	7.69378	CIMMYT	TST
79	CIMBL135	81.3333	7.05	11.5312	79.1667	8.25	9.60106	NA	NA	NA	NA	NA	NA	84.1805	8.15852	10.5325	CIMMYT	TST
80	CIMBL137	58.8333	6.76667	8.77889	64.3333	8.21667	7.82926	64	6.5	9.84615	73	8.48	8.60849	69.6567	7.78683	9.03261	CIMMYT	Mixed
81	CIMBL139	61.8333	6.45	9.59014	65.6667	7.58333	8.77503	76.3333	7.33333	10.4091	69.2	7.15	9.67832	72.3966	7.47982	9.76702	CIMMYT	TST
82	CIMBL140	81.5	6.93333	11.8959	64	7.73333	8.23409	70	6.76667	10.3448	78.2	8.15	9.59509	76.797	7.70482	10.1158	CIMMYT	TST
83	CIMBL141	72.3333	8.53333	8.47913	71.6667	10.75	6.66875	85.6667	8.36667	10.239	79.6	8.74	9.10755	80.1117	9.13685	8.90913	CIMMYT	Mixed
84	CIMBL142	69	7.56667	9.12415	63.5	8.71667	7.32562	75.6667	8.93333	8.47015	70.4	8.56	8.2243	73.576	8.58801	8.6145	CIMMYT	TST
85	CIMBL143	50.1667	8.13333	6.19194	64	9.68333	6.67363	70.6667	8.76667	8.06084	63.2	9.38	6.73774	67.0765	9.04643	7.42731	CIMMYT	Mixed
86	CIMBL144	74.8333	7.51667	9.9925	72.5	9.78333	7.76046	81.6667	6.66667	12.25	90	8.72	10.3211	82.1831	8.3588	10.17	CIMMYT	SS
87	CIMBL145	82	7.5	10.9437	76	8.96667	8.4848	84.3333	7.66667	11	84.5	8.66	9.75751	83.8501	8.38194	10.1396	CIMMYT	SS
88	CIMBL147	69.3333	7.2	9.58066	72.8333	10.3667	7.06923	84.6667	10.3333	8.19355	82.4	10.16	8.11024	80.1032	9.48802	8.57334	CIMMYT	TST
89	CIMBL149	64.3333	10.5	6.12698	62.5	11.4167	5.48231	72.3333	10.0667	7.18543	66.5	9.1	7.30769	70.8276	10.1252	7.09152	CIMMYT	TST
90	CIMBL15	81.1667	7.4	10.97	73.6667	7.6	9.69182	81	8.33333	9.72	84.5	7.3	11.5753	82.4684	7.92562	10.5253	CIMMYT	TST
91	CIMBL150	68.1667	7.7	8.85209	83	9.26667	8.95683	80	9.83333	8.13559	74	8.42	8.7886	79.2389	8.89082	8.96112	CIMMYT	TST
92	CIMBL151	65	8.3	7.83113	70.8333	9.15	7.74191	77.6667	9.33333	8.32143	NA	NA	NA	75.7471	9.04296	8.383	CIMMYT	TST
93	CIMBL152	49.8333	6.83333	7.31786	66.1667	9.4	6.98052	76.3333	8.2	9.30894	75	8.58	8.74126	71.1831	8.42609	8.44335	CIMMYT	TST
94	CIMBL153	62.3333	7.03333	8.85137	65.5	8.71667	7.56145	65.3333	7.5	8.71111	67	7.34	9.12807	69.6567	7.91721	8.85497	CIMMYT	TST
95	CIMBL157	79.8333	6.35	12.5865	80.6667	6.76667	11.9212	73.3333	6.5	11.2821	78	6.78	11.5044	80.6567	7.03612	11.68	CIMMYT	TST
96	CIMBL16	76.3333	8.25	9.27317	73.3333	10.0667	7.2872	78.3333	8	9.79167	83.2	8.98	9.26503	80.5205	8.90764	9.15176	CIMMYT	TST
97	CIMBL17	76.1667	6.5	11.7212	80.8333	7.08333	11.4368	88	7.33333	12	85.2	6.64	12.8313	84.5675	7.27795	11.8316	CIMMYT	TST
98	CIMBL18	79.5	9.43333	8.42498	80	10.8333	7.38462	88.6667	11.7667	7.53541	85.5	11.04	7.74457	85.3062	10.5415	8.16822	CIMMYT	TST
99	CIMBL2	76.5	10.3	7.43019	80.8333	10.2333	7.90137	93.3333	9.33333	10	88	9.2	9.56522	86.3686	9.69831	8.99578	Thailand	TST
100	CIMBL21	73.3333	7.81667	9.40689	78.8333	8.8	8.96364	84	8.4	10	80.4	8.7	9.24138	81.6637	8.5754	9.58288	CIMMYT	TST
101	CIMBL22	89.1667	6.85	13.0145	78.1667	7.75	10.1766	93.3333	7.5	12.4444	92	7.48	12.2995	89.3511	7.70482	11.8186	CIMMYT	TST
102	CIMBL25	78.6667	8.93333	8.84868	NA	NA	NA	79.6667	8.83333	9.01887	79.8	9.92	8.04435	80.4749	9.31445	8.6873	CIMMYT	TST
103	CIMBL27	72.5	13.9167	5.22107	78	12.0833	6.51239	77	12	6.41667	75.6	11.28	6.70213	78.7982	11.8474	6.81855	CIMMYT	TST
104	CIMBL28	74.3333	11.5	6.46377	NA	NA	NA	60	10.5	5.71429	66.2	10.975	6.03189	70.3026	10.7257	6.55508	CIMMYT	TST
105	CIMBL32	59.1667	10.3333	5.73958	63	9.13333	6.89781	62.6667	8.6	7.28682	60	8.34	7.19424	66.3953	9.13895	7.31032	CIMMYT	TST
106	CIMBL35	61.1667	7.35	8.32116	NA	NA	NA	NA	NA	NA	NA	NA	NA	70.7541	8.4141	8.42924	CIMMYT	TST
107	CIMBL36	61.3333	8.66667	7.08593	55.1667	8.08333	6.77333	NA	NA	NA	NA	NA	NA	67.8677	8.68475	7.7534	CIMMYT	TST
108	CIMBL38	74.8333	8.71667	8.61332	58.5	8.73333	6.69847	78.3333	7.66667	10.2174	77.2	9.28	8.31897	75.7667	8.71839	8.76831	CIMMYT	TST
109	CIMBL40	82.3333	9.03333	9.14343	80	8.7	9.20892	82.6667	8.03333	10.2905	82.2	8.34	9.85612	83.9288	8.6553	9.77569	CIMMYT	TST
110	CIMBL42	71.1667	6.31667	11.3219	71.6667	8.16667	8.77766	75.3333	8.33333	9.04	76	6.15	12.3577	76.8971	7.57655	10.4256	CIMMYT	TST
111	CIMBL43	72.6667	8.71667	8.36474	64	11.25	5.69499	81	7.96667	10.1674	77.4	10.88	7.11397	77.0887	9.64784	8.22238	NA	NA
112	CIMBL46	74	6.58333	11.4124	69.3333	9.21667	7.50638	77.3333	7.66667	10.087	72.8	7.65	9.51634	76.7459	8.02866	9.78219	CIMMYT	TST
113	CIMBL47	66.8333	6.75	9.98889	67.1667	8.41667	7.9845	74.3333	8.33333	8.92	71	8.02	8.85287	73.7378	8.11277	9.17776	CIMMYT	Mixed
114	CIMBL48	79.5	5.88333	13.6567	75.1667	7.95	9.4913	86	7.5	11.4667	87.6	7.925	11.0536	84.1566	7.63753	11.329	CIMMYT	TST
115	CIMBL51	71.8333	8.71667	8.24279	78	9.81667	7.94851	76.6667	8.63333	8.88031	77	9.12	8.44298	78.8834	9.11582	8.69465	CIMMYT	TST
116	CIMBL52	NA	NA	NA	70.8333	9.7	7.34946	NA	NA	NA	65.4	8.66	7.55196	73.1653	8.92718	8.29194	CIMMYT	TST
117	CIMBL53	67.6667	9.71667	6.96685	83	8.7	9.54023	73.6667	8.86667	8.30827	73.8	9.88	7.46964	77.7423	9.30087	8.43035	CIMMYT	TST
118	CIMBL54	70.3333	6.1	11.6942	71.5	8.58333	8.33207	79	8.3	9.51807	80.6	7.98	10.1003	78.4427	7.99501	10.0227	CIMMYT	TST
119	CIMBL55	70.3333	7.8	9.01893	72.5	9.56667	7.62288	81	9.13333	8.86861	78.25	7.25	10.7931	78.5811	8.5817	9.29908	CIMMYT	TST
120	CIMBL56	86.5	9.5	9.12184	73	9.26667	7.8777	80	8.66667	9.23077	72.4	9.26	7.81857	80.6716	9.20204	8.81164	CIMMYT	TST
121	CIMBL58	84.1667	9.31667	9.03662	87.8333	9.66667	9.08621	90.3333	8.16667	11.0612	88	9.18	9.58606	88.853	9.12634	9.83635	CIMMYT	TST
122	CIMBL6	71	6.66667	10.65	66.8333	8.95	7.46844	74.6667	7.23333	10.3226	72.6	7.98	9.09774	74.9662	7.96768	9.56771	CIMMYT	TST
123	CIMBL60	71.6667	8.13333	8.81148	74.3333	8.9	8.48427	75	9.63333	7.78547	68.2	8.4	8.11905	75.839	8.85718	8.6275	CIMMYT	TST
124	CIMBL62	65.3333	8.21667	7.99088	78	9.4	8.29787	84.6667	8.4	10.0794	NA	NA	NA	79.6689	8.84059	9.06885	CIMMYT	TST
125	CIMBL68	75	8.5	8.82353	65.3333	9.5	6.87719	79.6667	9.3	8.56631	81.2	9	9.02222	78.3937	9.11793	8.64699	CIMMYT	TST
126	CIMBL69	80.1667	8.03333	10.0532	78.3333	9.2	8.51379	84	9.66667	8.68966	82.4	10.58	7.78828	83.4392	9.36606	9.02611	CIMMYT	TST
127	CIMBL7	77.6667	10.45	7.43512	66.6667	8.5	7.84314	80.6667	9.93333	8.12081	84.2	10.34	8.14313	80.099	9.73195	8.26787	CIMMYT	TST
128	CIMBL70	66.1667	9.3	7.12248	68.5	10.75	6.37209	72.3333	10.0333	7.2093	73.8	10.1	7.30693	74.0508	9.93383	7.50313	CIMMYT	TST
129	CIMBL75	58.8333	7.35	8.07369	69.6667	7.6	9.16667	69	9.5	7.26316	64	8.84	7.23982	69.942	8.48497	8.3112	CIMMYT	TST
130	CIMBL76	69.8333	7.11667	9.84758	72.5	8.71667	8.42132	83	9	9.22222	70.8	7	10.1143	77.3144	8.18006	9.58071	CIMMYT	TST
131	CIMBL77	78.5	8.26667	9.50336	73.8333	9.65	7.65464	88.6667	8.9	9.96255	88.4	9.78	9.03885	84.3972	9.18101	9.26658	CIMMYT	TST
132	CIMBL81	66	7.98333	8.29357	66.6667	9.41667	7.10525	78.6667	8.83333	8.90566	72.8	7.78	9.35733	74.7618	8.63638	8.72932	CIMMYT	TST
133	CIMBL83	74.3333	8.21667	9.04798	61.3333	9.08333	6.75306	77	11.0667	6.95783	82.4	10.5	7.84762	77.0866	9.65835	8.0664	CIMMYT	TST
134	CIMBL84	71.1667	6.33333	11.3749	69	7	9.87862	80.6667	7.83333	10.2979	84.8	6.96	12.1839	79.3389	7.39781	10.9087	CIMMYT	TST
135	CIMBL85	70	7.66667	9.13242	70	7.36667	9.53715	76.6667	8	9.58333	76	8.12	9.35961	76.5778	8.03707	9.58288	CIMMYT	TST
136	CIMBL86	59.5	8.93333	6.66974	68	9.55	7.13187	69	10.5	6.57143	71.4	10.525	6.78385	71.3045	9.79294	7.31682	CIMMYT	TST
137	CIMBL87	82.3333	7.3	11.3296	76	8.06667	9.44089	85.3333	7	12.1905	81.6	6.775	12.0443	83.5158	7.6144	11.1838	CIMMYT	TST
138	CIMBL88	80	8.76667	9.12548	76.8333	8.01667	9.60777	80.6667	8.56667	9.41634	78.2	9.58	8.16284	81.4806	8.83194	9.30341	CIMMYT	TST
139	CIMBL89	74.5	6.68333	11.1492	65.1667	8.13333	8.00536	73	8.33333	8.76	70	6.72	10.4167	74.4489	7.7637	9.74102	CIMMYT	Mixed
140	CIMBL9	76.6667	7.48333	10.2735	71.1667	8.51667	8.36763	83.3333	7.33333	11.3636	85.6	8.775	9.75499	81.7084	8.23684	10.0465	CIMMYT	TST
141	CIMBL91	72	7.38333	9.76408	NA	NA	NA	84	8.16667	10.2857	83.2	7.26	11.4601	80.7616	8.01769	10.236	CIMMYT	TST
142	CIMBL92	78.5	8.2	9.57325	NA	NA	NA	88.6667	7.93333	11.1765	84.8	7.3	11.6164	84.2155	8.18278	10.4738	CIMMYT	TST
143	CIMBL93	66.3333	5.25	12.7099	73.6667	6.06667	12.1344	77.6667	6.53333	11.8878	77.6	6.06	12.8053	77.1313	6.51252	12.1674	CIMMYT	TST
144	CIMBL94	84	6.6	12.7657	82.6667	7.13333	11.5888	74.3333	8.33333	8.92	85.8	7.74	11.0853	83.8437	7.75109	11.0474	CIMMYT	TST
145	CIMBL95	75.3333	7.9	9.55172	61.1667	8.35	7.32908	80.6667	9.16667	8.8	82.8	10.54	7.85579	78.1319	9.04643	8.70115	CIMMYT	Mixed
146	CIMBL96	66.5	9.51667	6.99607	78.3333	10.0333	7.83829	74.6667	8.86667	8.42105	73.4	9.64	7.61411	76.6267	9.48802	8.12272	CIMMYT	TST
147	CIMBL99	51.8333	9.65	5.37401	54.5	10.0333	5.43855	61	9.63333	6.33218	56.6	10.1	5.60396	61.9437	9.77191	6.36144	CIMMYT	TST
148	CML114	72.3333	7.45	9.70725	66.8333	8.28333	8.08289	79.3333	7.83333	10.1277	79.5	8.5	9.35294	77.7103	8.22633	9.50922	CIMMYT	TST
149	CML115	79.6667	7.5	10.6304	76.3333	8.86667	8.61598	83	8.23333	10.081	77.2	8.14	9.48403	81.5871	8.36932	9.84285	CIMMYT	Mixed
150	CML116	72.6667	7.4	9.81982	64.8333	8.1	8.00391	81	8.66667	9.34615	78.8	8.76	8.99543	77.5634	8.40927	9.27092	CIMMYT	Mixed
151	CML118	80.8333	7.66667	10.5385	76.5	9.81667	7.82102	83.3333	9.66667	8.62069	83.8	9.54	8.78407	83.3455	9.20204	9.18209	CIMMYT	Mixed
152	CML121	69.5	7.61667	9.41368	60.5	8.98333	6.73636	73.3333	9.86667	7.43243	59.4	8.96	6.62946	70.2038	8.93498	7.97974	CIMMYT	TST
153	CML122	63.8333	7.38333	8.6462	64.8333	9.55	6.79429	71.3333	7.1	10.0469	69.8	8	8.725	71.7069	8.22002	8.84847	CIMMYT	TST
154	CML130	72	6.88333	10.5081	77.8333	7.9	9.92314	74.3333	7.33333	10.1364	76.8	7.28	10.5495	78.3426	7.66487	10.3433	CIMMYT	TST
155	CML134	74.3333	7.83333	9.52321	73.1667	9.16667	8.0239	75.3333	7.33333	10.2727	74	7.9	9.36709	77.4634	8.26207	9.48972	CIMMYT	TST
156	CML139	65.6667	7.56667	8.6753	71	9	7.88266	70.3333	8.16667	8.61224	70.8	8.275	8.55589	73.4121	8.4282	8.74231	CIMMYT	TST
157	CML162	79.5	9	8.8452	75.8333	9.4	8.10216	71.6667	10.3333	6.93548	72.8	9.28	7.84483	78.0957	9.47751	8.30903	CIMMYT	TST
158	CML163	78.8333	9.25	8.54554	64.3333	10.9	5.90214	83.6667	7.96667	10.5021	82.2	9.74	8.43943	80.0606	9.44597	8.66866	CIMMYT	TST
159	CML170	75.1667	8.03333	9.35696	80.8333	8.66667	9.33016	85.6667	8.8	9.73485	85.8	8.8	9.75	83.9863	8.69736	9.7042	CIMMYT	TST
160	CML171	74.1667	8.21667	9.05076	73.8333	11.2833	6.54273	83.6667	5.7	14.6784	78.8	9.36	8.4188	80.3672	8.75203	9.81685	CIMMYT	TST
161	CML172	81	10	8.15152	72.6667	9.16667	7.9332	82.6667	10	8.26667	77.8	9.88	7.87449	81.1485	9.69621	8.41519	CIMMYT	TST
162	CML191	83.6667	7.9	10.6142	89.6667	8.5	10.549	76.6667	9.33333	8.21429	74.6	8.7	8.57471	83.3775	8.7247	9.65437	CIMMYT	TST
163	CML192	80.5	7.48333	10.756	79.6667	8.93333	8.91791	86.3333	9.33333	9.25	84.6	8.5	9.95294	84.7591	8.68474	9.85801	CIMMYT	TST
164	CML26	83.6667	7.11667	11.7562	75.5	7.21667	10.5075	NA	NA	NA	NA	NA	NA	83.6874	7.81013	10.9683	CIMMYT	TST
165	CML289	76.1667	9.7	7.85167	NA	NA	NA	NA	NA	NA	NA	NA	NA	79.5918	9.75275	8.13839	CIMMYT	TST
166	CML29	88.1667	9.2	9.6191	NA	NA	NA	NA	NA	NA	NA	NA	NA	86.662	9.46793	9.23372	CIMMYT	TST
167	CML290	69.5	9.33333	7.44848	69.3333	8.83333	7.92875	78	9.23333	8.44765	75	9.52	7.87815	76.3989	9.2462	8.3047	CIMMYT	TST
168	CML304	68.3333	7.3	9.36592	73.5	7.81667	9.40356	69	8	8.625	67.4	7.78	8.66324	73.5036	7.9824	9.24709	CIMMYT	TST
169	CML31	80.3333	7.96667	10.1232	74.3333	8.4	8.84921	92.6667	7.23333	12.8111	88	8.52	10.3286	85.6596	8.23894	10.5578	CIMMYT	TST
170	CML323	80.6667	6.5	12.4103	82	8.03333	10.2075	85	6.5	13.0769	78.4	7.2	10.8889	83.6883	7.42094	11.5283	CIMMYT	TST
171	CML324	69.6667	9.5	7.3374	71.3333	9.43333	7.56119	79.3333	10.8333	7.32308	77.8	11.16	6.97133	77.7401	10.0894	7.75877	CIMMYT	TST
172	CML325	69.5	7.16667	9.69613	65.3333	8.25	7.92989	72.6667	8.16667	8.89796	75.4	8.36	9.01914	74.4978	8.20319	9.1366	CIMMYT	TST
173	CML327	73.3333	7.96667	9.20502	74.6667	8.2	9.19622	85	8.1	10.4938	78	7.95	9.81132	80.48	8.25997	9.82118	CIMMYT	Mixed
174	CML338	82.1667	8.13333	10.1071	80.5	8.98333	9.00609	91	7.93333	11.4706	87.4	9.68	9.02893	86.8816	8.78568	10.0183	CIMMYT	TST
175	CML360	71.5	6.83333	10.48	77.8333	7.86667	9.90617	74.6667	7	10.6667	72.4	7.16	10.1117	77.3718	7.55342	10.3541	CIMMYT	TST
176	CML361	70.3333	7.93333	8.86555	81.3333	11.4	7.18492	86.3333	8.4	10.2778	73.5	8.5	8.64706	80.5843	9.10321	9.01311	CIMMYT	TST
177	CML40	81.6667	7.63333	10.6987	76	8.3	9.15663	NA	NA	NA	NA	NA	NA	83.1313	8.38716	10.047	CIMMYT	TST
178	CML411	68.6667	6.61667	10.3693	71.8333	7.4	9.70495	88	9.23333	9.53069	95.6	9.7	9.85567	83.2689	8.41348	9.98366	CIMMYT	TST
179	CML415	74.3333	7.13333	10.4251	74	7.55	9.81092	87.3333	8	10.9167	86.6	8.84	9.79638	82.8772	8.11277	10.3086	CIMMYT	TST
180	CML422	70.6667	7.4	9.54466	69.5	7.61667	9.1531	64.6667	6.93333	9.32692	65.2	7.16	9.10615	71.7601	7.60599	9.47889	CIMMYT	TST
181	CML423	74.6667	7.03333	10.6161	NA	NA	NA	78	8.33333	9.36	74.8	8.42	8.88361	77.589	8.27597	9.50312	CIMMYT	TST
182	CML426	64.3333	7.51667	8.56276	70	8.8	8.02083	74.3333	8.5	8.7451	73	8.38	8.71122	74.2338	8.46605	8.80947	CIMMYT	TST
183	CML454	64.3333	7.1	9.06103	58.6667	8.83333	6.64151	102.667	8.66667	11.8462	99.2	8.54	11.6159	83.4328	8.45343	9.92084	CIMMYT	TST
184	CML470	72.8333	7.78333	9.71391	73	9.36667	7.79359	81.6667	7.5	10.8889	78	7.94	9.82368	79.3091	8.33778	9.71286	CIMMYT	TST
185	CML474	72.3333	6.25	11.594	72.6667	7.86667	9.28061	NA	NA	NA	NA	NA	NA	78.434	7.73029	10.4331	CIMMYT	TST
186	CML479	73.0833	11.125	6.57677	70	10.7	6.54206	81.3333	9.6	8.47222	74.4	9.72	7.65432	77.8849	10.1378	7.7696	CIMMYT	TST
187	CML486	76.6667	8.61667	8.89737	71.6667	8.98333	7.98106	75.6667	7.76667	9.74249	74.6	7.7	9.68831	77.8423	8.43871	9.30125	CIMMYT	TST
188	CML493	69.1667	7.83333	8.94017	62.3333	9.53333	6.57132	70	9.33333	7.5	71.8	8.9	8.06742	72.4541	8.96863	8.16822	CIMMYT	TST
189	CML496	78.8333	8.51667	9.27808	70.8333	9.58333	7.3916	90.6667	9.66667	9.37931	84.6	10.24	8.26172	83.4456	9.47751	8.86797	CIMMYT	TST
190	CML50	70.1667	8.56667	8.2271	59.3333	8.16667	7.26531	86.6667	7.76667	11.1588	70.6	8.55	8.25731	75.3217	8.43661	9.00012	CIMMYT	TST
191	CML69	67.6667	6.91667	9.7907	66.3333	8.38333	7.94962	97.6667	9.66667	10.1034	89.8	9.86	9.10751	82.709	8.80881	9.4399	CIMMYT	TST
192	CY72	82.1667	9.16667	8.96356	76.5	11	6.9761	NA	NA	NA	NA	NA	NA	83.5021	9.9259	8.54852	China	NSS
193	D047	76.8333	7.26667	10.5609	69.1667	7.2	9.70119	78.6667	6.66667	11.8	84	7.94	10.5793	79.984	7.59968	10.6726	China	Mixed
194	D863F	72	8.96667	8.04715	71.1667	10.0833	7.10216	81.6667	10.1667	8.03279	84.8	9.2	9.21739	80.1905	9.56373	8.45418	China	NSS
195	DAN360	75.5	7.85	9.69757	75.6667	8.2	9.21335	83.6667	9.56667	8.74564	79.6	8.38	9.49881	81.2124	8.63428	9.48539	China	NSS
196	DAN4245	74.8333	7.23333	10.3691	70.6667	9.08333	7.79147	79.3333	9.83333	8.0678	79	8.32	9.49519	78.9536	8.73101	9.17559	China	Mixed
197	DAN598	64.8333	8.1	8.02706	64.1667	9.65	6.67438	72.3333	9.83333	7.35593	68.4	9.26	7.38661	71.6941	9.23148	7.8151	China	NSS
198	DAN599	71.3333	8.08333	8.8193	72.3333	9.95	7.26711	76.6667	9.33333	8.21429	73.75	9.6	7.68229	76.8779	9.25671	8.36319	China	NSS
199	DE.EX	73.6667	8.45	8.71329	72.8333	10.0167	7.29715	80	10.1667	7.86885	78.4	8.96	8.75	79.1814	9.39129	8.50401	USA	NSS
200	DH29	67.8333	7.01667	9.67239	64.1667	9.05	7.09023	70.6667	10.5	6.73016	73	7.425	9.83165	72.9586	8.63428	8.65349	China	Mixed
201	DH3732	77.5	8.33333	9.30012	69.6667	9.38333	7.42491	83.3333	9	9.25926	84.8	9.02	9.40133	81.3955	8.99807	9.09977	China	Mixed
202	DONG237	54.3333	6.63333	8.19095	NA	NA	NA	57.3333	7.33333	7.81818	69.4	8	8.675	65.0365	7.79135	8.3499	China	NSS
203	DSB	77.5	6.81667	11.3676	66.1667	7.86667	8.4592	72.3333	9.16667	7.89091	82.4	8.04	10.2488	77.7976	8.19268	9.66087	China	Mixed
204	EN25	55	7.53333	7.38296	60.5	8.96667	6.76031	64.6667	10.1667	6.36066	61.2	9.24	6.62338	65.6565	9.03592	7.31032	China	Mixed
205	ES40	53.6667	8.83333	6.07547	51.8333	10.35	5.01924	66.3333	7	9.47619	87.2	8.86	9.84199	69.4162	8.85297	8.02524	China	Mixed
206	FCD0602	71.1667	7.8	9.12273	81	9.2	8.83426	75.3333	9	8.37037	79.8	8.74	9.13043	79.6923	8.78988	9.11494	China	Mixed
207	GEMS1	72.1667	7.71667	9.41925	71.3333	8.21667	8.66831	83.3333	9	9.25926	85.6	9.54	8.97275	80.7845	8.73521	9.30341	NA	NA
208	GEMS11	69.8333	7.18333	9.72179	63.8333	9.28333	6.87945	67.3333	6.33333	10.6316	80.4	8.42	9.54869	74.1764	8.04759	9.40307	USA	SS
209	GEMS12	69.8333	8.08333	8.68291	64.8333	9.01667	7.20262	80.6667	7.66667	10.5217	75.6	9.04	8.36283	76.2073	8.59432	8.96545	USA	SS
210	GEMS14	71.8333	9.5	7.56025	75.6667	11.5667	6.54179	80	10.2667	7.79221	81.4	10.26	7.93372	80.033	10.2324	7.89525	USA	SS
211	GEMS16	59.8333	7.08333	8.45278	69.8333	9.06667	7.78742	79.3333	8.83333	8.98113	77.8	8.52	9.13146	75.326	8.52913	8.87663	NA	NA
212	GEMS17	78	7.23333	10.7834	73.5	8.38333	8.77685	95.6667	7.5	12.7556	87.6	7.5	11.68	85.5404	7.92142	10.9672	USA	SS
213	GEMS19	79.5	7.95	10.0405	72.1667	9.51667	7.57467	99	10	9.9	94.8	9.06	10.4636	87.8183	9.16629	9.66087	USA	TST
214	GEMS2	73	6.56667	11.1302	73.3333	9	8.21517	76.6667	8	9.58333	78.8	7.86	10.0254	78.5214	8.09385	9.87534	NA	NA
215	GEMS20	64.3333	8.93333	7.20149	60.6667	10.3833	5.8796	69.3333	9.16667	7.56364	81.8	9.35	8.74866	73.0566	9.43966	7.8021	USA	SS
216	GEMS21	76	7.5	10.1333	70.5	8.83333	7.96049	81.3333	9.33333	8.71429	84.4	8.44	10	80.7419	8.6553	9.4074	USA	SS
217	GEMS23	65.6667	5.25	12.5667	73.1667	7.2	10.1449	79.3333	8.33333	9.52	82	8.5	9.64706	78.1744	7.64174	10.5079	USA	SS
218	GEMS24	65.5	7.18333	9.11613	77	10.3	7.47573	78	9.66667	8.06897	77.25	9.24	8.36039	77.6592	9.13685	8.59067	USA	TST
219	GEMS25	75.1667	8.43333	8.9548	72.8333	10.6667	6.82247	77.3333	9.66667	8	77	10.05	7.66169	78.6343	9.64784	8.24404	USA	Mixed
220	GEMS27	77.8333	7.98333	9.72752	72.3333	8.36667	8.65226	80	8.33333	9.6	81.2	7.28	11.1538	80.5567	8.2053	9.91217	USA	Mixed
221	GEMS28	68	7.33333	9.32715	70.6667	9.41667	7.55511	71.6667	9.5	7.54386	74	7.8	9.48718	74.8044	8.64479	8.78348	USA	Mixed
222	GEMS29	62.5	7.15	8.7488	67.6667	9.26667	7.30216	64.3333	9.06667	7.09559	67	8.3	8.07229	69.942	8.59012	8.19855	USA	Mixed
223	GEMS3	63.1667	7.35	8.65306	68.6667	9.65	7.11129	69.3333	6	11.5556	77	8.36	9.21053	73.4909	8.07913	9.34891	USA	Mixed
224	GEMS30	67.3333	8	8.41667	66	8.21667	8.03657	84	9.33333	9	79.8	10.2	7.82353	77.5273	9.00227	8.64483	USA	TST
225	GEMS31	62.6667	7	8.95454	60.8333	8.21667	7.40133	65.6667	8.16667	8.04082	68	8.9	7.64045	69.0202	8.27469	8.37403	USA	TST
226	GEMS32	77.8333	7.43333	10.5052	65.6667	7.86667	8.3254	77	8.33333	9.24	78	9.34	8.35118	77.8189	8.41768	9.32724	USA	Mixed
227	GEMS33	68.6667	7.91667	8.67835	60.3333	8.81667	6.84782	71	7.8	9.10256	90.25	6.4	14.1016	76.0626	7.99081	9.82551	USA	NSS
228	GEMS35	70.5	8.225	8.57863	69.8333	9.78333	7.4486	75.3333	7.66667	9.82609	95.8	11.26	8.50799	80.578	9.25251	8.88096	USA	NSS
229	GEMS36	80	7.73333	10.3347	78.8333	9.35	8.4585	NA	NA	NA	75	8.16	9.19118	81.3753	8.6008	9.56985	USA	NSS
230	GEMS37	80	6.88333	11.6002	72	7.5	9.61498	84.3333	8.83333	9.54717	86.4	9.14	9.45295	82.9772	8.28731	10.1461	USA	NSS
231	GEMS39	80.6667	7.68333	10.5632	70.6667	8.05	8.78528	82	7.83333	10.4681	86.4	8	10.8	82.3407	8.12118	10.235	USA	NSS
232	GEMS4	NA	NA	NA	59.1667	6.93333	8.53056	NA	NA	NA	82.6	6.6	12.5152	75.2192	7.17431	10.6429	USA	SS
233	GEMS42	75	7.26667	10.3211	73.3333	7.96667	9.22764	74.3333	8.93333	8.3209	77.6	8.4	9.2381	78.1936	8.33357	9.47456	USA	NSS
234	GEMS44	66.3333	8.4	7.91209	62	9.53333	6.61975	80	8.66667	9.23077	65.2	7.5	8.69333	72.5031	8.6553	8.46502	USA	Mixed
235	GEMS45	73	7.96667	9.16318	78.3333	8.1	9.67078	78.6667	7.9	9.95781	72.2	9	8.02222	78.6066	8.41768	9.40957	USA	Mixed
236	GEMS48	63.5	7.75	8.44628	64.5	10.1833	6.3273	70	9.33333	7.5	77.6	9.34	8.30835	72.9437	9.18101	8.06207	USA	NSS
237	GEMS49	67.6667	7.31667	9.31778	68.5	8.91667	7.71786	75	6.66667	11.25	81.6	9.28	8.7931	76.5991	8.25366	9.46806	USA	SS
238	GEMS5	78.6667	7.58333	10.4015	76.8333	8.1	9.55275	89.6667	9.43333	9.5053	85.8	7.8	11	84.7314	8.40507	10.2003	USA	SS
239	GEMS51	72.3333	7.01667	10.3132	70.5	7.36667	9.59911	76.3333	6.66667	11.45	87.2	7.52	11.5957	79.4922	7.49454	10.7419	USA	SS
240	GEMS53	65.6667	6.58333	10.0591	64.3333	7.76667	8.30664	75	7.83333	9.57447	79.6	8.68	9.17051	74.8597	7.97399	9.47456	USA	SS
241	GEMS55	57.5	7.91667	7.2633	53.8333	8.68333	6.23161	60.3333	9.73333	6.19863	60.8	9.14	6.65208	63.7597	8.94339	7.14135	USA	SS
242	GEMS56	67.6667	7.01667	9.64656	65.5	7.95	8.23431	76.3333	8.33333	9.16	73.2	7.68	9.53125	74.4553	7.99922	9.35757	USA	NSS
243	GEMS58	73.5	8.26667	8.89463	67.5	8.86667	7.62217	69.3333	7	9.90476	71	9.04	7.85398	74.1636	8.46184	8.85713	USA	NSS
244	GEMS6	79.6667	7.03333	11.327	NA	NA	NA	88	7.66667	11.4783	NA	NA	NA	84.0067	8.02792	10.7461	USA	SS
245	GEMS60	80.1667	7.83333	10.2354	72.5	8.73333	8.35531	80.3333	8.83333	9.09434	73.6	7.18	10.2507	79.5433	8.33357	9.65437	USA	NSS
246	GEMS61	75.1667	8.48333	8.86186	64.6667	10.35	6.2262	73	10.2	7.15686	80.6	9.92	8.125	76.7417	9.67518	8.01657	USA	TST
247	GEMS62	60.1667	6.23333	9.66896	63.5	7.31667	8.69326	64.6667	7	9.2381	74.2	9.04	8.20796	70.1634	7.70693	9.19293	NA	NA
248	GEMS63	71.3333	5.9	12.1305	68.5	7.45	9.23204	73.6667	8.16667	9.02041	83	7.48	11.0963	77.3931	7.58286	10.4213	USA	SS
249	GEMS64	73.5	5.85	12.5029	65.6667	8.23333	7.98131	80	10.3333	7.74194	76.2	8.12	9.38424	77.1526	8.32516	9.58071	USA	SS
250	GEMS65	67.3333	7.41667	9.12442	63.1667	6.5	9.71215	75.3333	6.66667	11.3	76.8	7.2	10.6667	74.4404	7.32842	10.274	NA	NA
251	GEMS66	70.3333	6.9	10.1932	70	7.68333	9.1119	73.3333	6.16667	11.8919	82	6.46	12.6935	77.2143	7.20645	10.9412	NA	NA
252	GEMS9	NA	7.5	NA	67.5	8.58333	7.91914	85	7.16667	11.8605	82	7.68	10.6771	79.9553	7.98871	10.3019	USA	SS
253	GY1007	51.3333	8	6.41667	NA	NA	NA	68	10.5	6.47619	61.2	9.44	6.48305	64.8932	9.38368	6.88141	China	NSS
254	GY1032	77.3333	8.08333	9.57058	69.5	8.71667	8.04355	73.6667	8	9.20833	72.4	9.22	7.85249	76.6267	8.63848	8.94596	China	NSS
255	GY220	75.1667	6.56667	11.4512	61.8333	8.68333	7.17029	84.3333	8.33333	10.12	81.8	9.6	8.52083	78.8046	8.46184	9.50705	China	NSS
256	GY246	70.8333	8.83333	8.01357	70	9.86667	7.14727	NA	NA	NA	NA	NA	NA	76.888	9.39242	8.25035	China	NSS
257	GY386	68.5	7.2	9.51163	55.6667	8.71667	6.45345	80.3333	9	8.92593	76	9.28	8.18966	73.9869	8.67633	8.6015	China	NSS
258	GY386B	73.6667	8.53333	8.64248	65.5	9.15	7.158	69	8	8.625	76	10.24	7.42188	74.7682	9.03802	8.33503	China	NSS
259	GY462	70.8333	7.45	9.5009	69.6667	8.46667	8.24949	80	7.33333	10.9091	73.8	8.34	8.84892	76.9248	8.12749	9.56121	China	NSS
260	GY798	72.3333	6.41667	11.2692	66.6667	7.88333	8.50435	79.6667	8	9.95833	79.6	7.2	11.0556	77.7699	7.688	10.2718	China	NSS
261	HB	52	6.16667	8.43652	47.6667	5.88333	8.21618	58.6667	8.16667	7.18367	56.25	7.2	7.8125	59.9553	7.25061	8.2917	China	Mixed
262	HU803	69	9	7.71792	69.6667	10.4667	6.66457	73.6667	9.5	7.75439	79.4	11.225	7.0735	76.3798	9.93803	7.76094	China	SS
263	HYS	65.5	7.78333	8.42148	59.3333	9.31667	6.40468	78.3333	9.4	8.33333	67.2	9.3	7.22581	71.8282	9.01278	8.01657	China	Mixed
264	IRF291	60.5	6.56667	9.2972	59.8333	9.51667	6.27976	69	8.66667	7.96154	71.2	8.18	8.70416	69.7355	8.41138	8.41952	China	NSS
265	IRF314	68.3333	7.15	9.55949	63.6667	8.61667	7.43275	79.3333	9.66667	8.2069	79.2	8.625	9.18261	76.1222	8.649	8.88313	China	NSS
266	J4112	66	8.63333	7.64595	61.8333	9.46667	6.58316	69.6667	7.5	9.28889	65.4	8.66	7.55196	70.24	8.68895	8.16605	China	Mixed
267	JI63	63.8333	7.46667	8.55549	53.6667	8.91667	6.01923	71.6667	9.5	7.54386	68	9	7.55556	69.0202	8.82143	7.86492	China	NSS
268	JI846	69	6.45	10.714	71.8333	7.68333	9.35037	75.3333	7.83333	9.61702	74.8	7.64	9.79058	76.2137	7.70903	9.98583	China	NSS
269	JI853	66.3333	8.11667	8.17229	65	10.55	6.16195	67.3333	10.5	6.4127	68.6	10.44	6.57088	71.1682	9.81396	7.35149	China	Mixed
270	JIAO51	72.6667	8.91667	8.1507	67.5	8.28333	8.27876	73.6667	8.33333	8.84	77.6	8.925	8.69468	76.3159	8.73101	8.79214	China	Mixed
271	JING24	73.3333	9.05	8.1122	66.1667	9.4	7.10242	NA	NA	NA	NA	NA	NA	76.3949	9.3017	8.26946	NA	NA
272	JY01	NA	NA	NA	50.6667	7.51667	6.72846	70	10.5	6.66667	70	10.26	6.82261	68.1007	9.19154	7.47005	China	NSS
273	K10	53.6667	5.76667	9.39605	52.3333	8.96667	5.8522	64.6667	7	9.2381	63	8.7	7.24138	64.0173	7.88567	8.30903	China	NSS
274	K12	71.8333	8.6	8.35537	55.8333	9.41667	5.87878	74.3333	9.5	7.82456	73.4	10.84	6.77122	72.899	9.55111	7.68078	China	NSS
275	K22	61.6667	8.35	7.40542	62	9.66667	6.40455	62.6667	9.83333	6.37288	65	9.32	6.97425	67.779	9.30087	7.31682	China	NSS
276	L3180	73.3333	9.06667	8.15646	70.1667	9.08333	7.73737	NA	NA	NA	NA	NA	NA	77.8779	9.19282	8.53323	China	Mixed
277	LG001	69.1667	6.98333	9.92837	77	7.86667	9.85299	73.3333	8	9.16667	74.6	8.98	8.30735	76.8822	8.17796	9.50705	China	NSS
278	LIAO138	72.6667	9.88333	7.35387	71.1667	10.9167	6.64083	77.3333	12.3333	6.27027	82	11.4	7.19298	78.8131	10.8486	7.38182	China	NSS
279	LIAO159	70	8.73333	8.01527	74.8333	8.96667	8.36452	81.3333	8.83333	9.20755	81.6	9.6	8.5	79.7903	9.08218	8.8203	China	Mixed
280	LIAO5114	68.3333	7.56667	9.04351	67.6667	10	6.82147	70	8.43333	8.3004	76.6	9.26	8.27214	74.434	8.89923	8.46068	China	Mixed
281	LIAO5262	76.3333	10.15	7.55643	70.6667	10.8333	6.52276	81.6667	10.3333	7.90323	81.25	9.88	8.22368	80.2501	10.1462	7.97758	China	NSS
282	LIAO5263	54.5	9.11667	5.99124	52.6667	9.41667	5.59686	64	10.5	6.09524	58.2	9.82	5.92668	63.1019	9.65625	6.55209	China	NSS
283	LK11	51.5	6.43333	8.01794	61	8.53333	7.14844	62.6667	8	7.83333	61.8	7.84	7.88265	64.7198	7.96137	8.12489	China	NSS
284	LV28	62.5	7.06667	8.84912	57.8333	8.3	7.09344	61.3333	7.33333	8.36364	63.8	8.3	7.68675	66.5272	8.00343	8.36536	China	NSS
285	LX9801	66.8333	7.08333	9.45288	75.8333	9.51667	8.01782	88	8.16667	10.7755	64.2	8.56	7.5	77.044	8.49339	9.17993	China	NSS
286	LXN	74.5	8.05	9.25592	69.5	9.13333	7.69647	66	9.66667	6.82759	68	10.54	6.45161	73.4547	9.34714	7.98624	China	NSS
287	LY	66.1667	8.71667	7.61143	58.6667	10.3333	5.71218	76	10.5	7.2381	70.2	10.3	6.81553	71.973	9.86443	7.36665	China	TST
288	LY042	70.5	9.25	7.63494	57.8333	9.85	5.88865	86.3333	8	10.7917	76	10.04	7.56972	76.1499	9.29456	8.34153	China	NSS
289	M153	65.5	5.41667	11.82	NA	6.5	NA	64	9.4	6.80851	70.6	8.02	8.80299	70.1863	7.65436	9.10765	China	NSS
290	M165	64.1667	8.28333	7.77115	55.6667	8.91667	6.2619	76.3333	8.23333	9.27126	68.6	9.42	7.28238	70.6381	8.81302	8.0599	China	NSS
291	M97	NA	NA	NA	76.6667	11.4	6.72515	70.3333	9.76667	7.20137	71.2	9	7.91111	75.5467	9.6948	7.91806	China	NSS
292	MN	84.5	5.9	14.6288	70.8333	7.56667	9.44887	82	7.83333	10.4681	87.6	7.42	11.8059	83.4456	7.52398	11.4785	China	Mixed
293	MO113	50.8333	5.55	9.24743	58	8.35	7.05383	65	8.5	7.64706	63.2	8.12	7.78325	64.7326	7.90249	8.30903	China	NSS
294	MO17	45.5	4.98333	9.25287	59.6667	5.53333	10.7831	71	10	7.1	69.4	7.225	9.60554	66.5507	7.3179	9.3944	China	NSS
295	NAN21-3	61	7.33333	8.31818	68.3333	9.68333	7.06417	70.6667	10	7.06667	73.2	8.56	8.5514	72.4328	8.96442	8.15089	China	Mixed
296	NMJT	70.1667	6.21667	11.5564	69.3333	8	8.67405	80.3333	8.16667	9.83673	80.2	7.5	10.6933	78.1446	7.77001	10.2653	China	Mixed
297	P138	70	8.5	8.2764	67.8333	9.63333	7.0928	NA	NA	NA	NA	NA	NA	75.7757	9.18556	8.33063	China	NSS
298	P178	57	9.66667	5.91058	63.8333	11.5833	5.52927	65.3333	11.5	5.68116	64.4	10.8	5.96296	67.613	10.6425	6.4351	China	NSS
299	Q1261	62.3333	8.73333	7.15106	62.5	9.23333	6.78844	66	9.5	6.94737	75	10.64	7.04887	70.8638	9.49644	7.48797	China	NSS
300	QI205	82.8333	9.06667	9.14161	57.3333	9.81667	5.83693	80	8.5	9.41176	71.75	8.15	8.80368	76.416	8.95811	8.62533	China	Mixed
301	QI319	73.6667	7.85	9.38514	73.8333	8.55	8.6464	84.3333	8.7	9.69349	79	9.1	8.68132	80.4438	8.67633	9.32291	China	NSS
302	R08	63	8.43333	7.7064	67.8333	9	7.56665	80	9.83333	8.13559	75.4	8.94	8.434	75.2068	9.0969	8.33503	China	NSS
303	R15	NA	NA	NA	62.5	8.6	7.26744	NA	NA	NA	65.2	7.52	8.67021	70.0028	8.11425	8.6895	China	NSS
304	RY684	67.6667	7.6	8.90351	63.6667	9.35	6.81045	71	7.83333	9.06383	76.4	8.92	8.56502	73.6122	8.57119	8.65783	China	NSS
305	RY697	75.1667	7	10.8838	75	8.71667	8.67736	NA	NA	NA	79.75	9.45	8.43915	80.3178	8.58216	9.57538	China	Mixed
306	RY713	63.1667	9	7.01374	64.6667	9.85	6.55641	71.3333	10	7.13333	65	9.52	6.82773	70.5104	9.55321	7.39915	China	NSS
307	RY729	72.6667	7.96667	9.11969	71.5	9.16667	7.8016	81	9.83333	8.23729	81.2	9.3	8.73118	79.4944	9.11162	8.77698	China	NSS
308	RY732	63.5	6.25	10.1432	59.1667	8.56667	6.90272	75.3333	7.5	10.0444	76	7.24	10.4972	72.6031	7.70062	9.57638	China	Mixed
309	S22	55.3333	8.26667	6.68294	49.5	9.96667	4.97669	64.6667	10.8333	5.96923	65.4	10.65	6.14085	64.2791	9.83709	6.58458	China	NSS
310	S37	70.3333	8.6	8.19274	70.8333	8.88333	7.95508	53	9.66667	5.48276	NA	NA	NA	70.5162	9.14148	7.75799	China	TST
311	SC55	68.6667	8.95	7.67996	67.3333	9.46667	7.10547	66	9.06667	7.27941	62.25	9.44	6.59428	70.5274	9.2504	7.64395	USA	Mixed
312	SHEN135	65.3333	7.88333	8.2845	63.6667	9.11667	7.01695	NA	NA	NA	NA	NA	NA	72.502	8.77547	8.30387	China	Mixed
313	SHEN137	74.1667	8.55	8.69162	71.5	10.6	6.82171	74	10.1667	7.27869	75.8	9.52	7.96218	77.1739	9.65205	8.09673	China	NSS
314	SHEN5003	61.3333	8.38333	7.31143	58.6667	8.25	7.11211	62	7.5	8.26667	62.6	8.74	7.16247	66.3442	8.39666	7.90175	China	NSS
315	SI273	61.5	7.35	8.38148	62	9.85	6.29432	69.3333	9.16667	7.56364	67.2	8.82	7.61905	69.629	8.88451	7.90175	China	NSS
316	SI444	65	7.46667	8.70253	66	10.8	6.12593	75.3333	8.66667	8.69231	78	9.16	8.51528	74.8023	9.07587	8.37619	China	NSS
317	SK	64.8333	5.2	12.5416	61.6667	6.15	10.0463	75.3333	7.33333	10.2727	66.4	6.22	10.6752	71.3747	6.7207	10.8676	China	NSS
318	SW1611	75.6667	7.58333	9.97854	73.3833	8.5	8.63138	NA	NA	NA	NA	NA	NA	79.9355	8.4416	9.56918	China	TST
319	SW92E114	74.3333	9.55	7.78942	66.3333	9.43333	7.05879	68.6667	7	9.80952	78.8	10.14	7.7712	75.6112	9.08008	8.46068	China	TST
320	SY1052	70.6667	7.06667	10	62	7.76667	7.98283	74.3333	9.76667	7.61092	74	8.5	8.70588	74.0933	8.44712	8.8658	China	NSS
321	SY1077	62	9.95	6.22267	63.6667	9.08333	7.11525	75.6667	10	7.56667	65.2	10.66	6.11632	71.015	9.83079	7.29083	China	Mixed
322	SY1128	61	8.5	7.19923	53.8333	8.75	6.17941	70	9.83333	7.11864	64.6	10.3	6.27184	67.3724	9.34503	7.2345	China	NSS
323	SY3073	69.8333	7.65	9.21766	65.6667	9.36667	7.00084	78.6667	9.16667	8.58182	73.6	8.64	8.51852	75.5346	8.80881	8.65349	China	NSS
324	SY998	66.1667	7.75	8.55711	63.5	7.51667	8.45044	71.6667	8.5	8.43137	74.6	9.28	8.03879	73.0161	8.43451	8.68815	China	NSS
325	SY999	74.5	4.91667	15.1763	61.5	6.93333	8.85463	73.6667	7.16667	10.2791	82.4	7.88	10.4569	76.45	7.14126	11.134	China	NSS
326	TIAN77	49.3333	8.05	6.11885	61.8333	9.18333	6.73505	55.3333	6.66667	8.3	64.6	8.58	7.52914	63.468	8.31464	7.65045	China	Mixed
327	TIE7922	72.1667	8.4	8.60507	67.1667	8.13333	8.73419	75	10.1667	7.37705	72.6	8.68	8.36406	75.3579	8.92447	8.6015	China	SS
328	TX5	70.8333	6.51667	10.8859	60.3333	6.36667	9.48241	69.6667	8.33333	8.36	70.5	7.62	9.25197	72.0347	7.54921	9.66303	China	Mixed
329	TY10	82.5	8.35	9.88016	73.6667	9.15	8.11265	78.6667	8.33333	9.44	74.25	9.28	8.00108	80.0734	8.86769	9.1106	China	Mixed
330	TY11	74.5	7.91667	9.42059	65	7.55	9.36951	70	8.33333	8.4	76.25	8.48	8.99175	75.1046	8.27259	9.27308	China	Mixed
331	TY2	77.5	8.05	9.62834	72.5	8.55	8.57472	73	8.16667	8.93878	73.2	9.54	7.67296	77.3293	8.69946	8.97629	China	Mixed
332	TY3	78.5	8.8	8.92915	71.6667	8.51667	8.41323	68.3333	9.33333	7.32143	81.5	9.54	8.54298	78.1382	9.0948	8.6275	China	Mixed
333	TY4	84.1667	8.98333	9.36449	69.5	10.3833	6.70285	82.3333	10	8.23333	84.25	9.52	8.84979	82.4493	9.66046	8.6145	China	Mixed
334	TY5	71.3333	7.83333	9.11015	63.1667	8.28333	7.66477	77	7.66667	10.0435	75.5	8.16	9.25245	75.3707	8.20109	9.24709	China	Mixed
335	TY6	72.8333	9.18333	7.93149	74	9.61667	7.55102	73.3333	11	6.66667	73.6	10	7.36	76.8098	9.85392	7.82809	China	Mixed
336	TY7	74.1667	7.91667	9.375	72.8333	9.25	7.9076	79.3333	9	8.81481	77	8.7	8.85057	78.8472	8.81722	9.00662	China	Mixed
337	TY8	75.3333	8.05	9.38151	71.1667	9.8	7.26667	61.6667	9.66667	6.37931	76.6	9.2	8.32609	74.8959	9.20625	8.22888	China	Mixed
338	U8112	67.8333	7.41667	9.16363	69	8.76667	7.90253	72	8.5	8.47059	70.4	7.9	8.91139	73.7165	8.33778	8.89613	China	SS
339	W138	58.3333	7.03333	8.3014	55.5	8.23333	6.75028	66.6667	8.5	7.84314	60.8	8.58	7.08625	65.6416	8.28521	7.92991	China	NSS
340	WH413	62.6667	7.6	8.24507	52.1667	7.8	6.69053	62.6667	7	8.95238	69	8.66	7.96767	66.7508	8.01604	8.3372	China	Mixed
341	WMR	71.5	6.66667	10.8328	65	6.93333	9.3803	58.3333	6.66667	8.75	73.25	7.04	10.4048	71.3428	7.22748	9.962	China	Mixed
342	WU109	71	8.46667	8.39527	68.1667	10.4667	6.5026	73.3333	7	10.4762	73.8	8.42	8.76485	75.2217	8.70998	8.83114	China	Mixed
343	X1141P	73.3333	7.51667	9.77133	55.1667	6.53333	8.47933	NA	NA	NA	NA	NA	NA	72.3167	7.70489	9.43156	China	NSS
344	XI502	65.8333	7.98333	8.25304	66.1667	8.58333	7.71359	70	9	7.77778	72.8	8.68	8.3871	72.7734	8.68474	8.39569	China	NSS
345	XUN971	64.8333	8.28333	7.84469	61	10.0167	6.06358	76.6667	8.33333	9.2	70.6	10.26	6.88109	72.4115	9.24199	7.92991	China	Mixed
346	XZ698	73.8333	7.45	9.94324	72.3333	9.75	7.42593	78.6667	8.5	9.2549	86.2	7.3	11.8082	80.4864	8.42399	9.76052	China	NSS
347	YAN414	66.8333	10.8833	6.15554	61.1667	11.6667	5.2673	71.6667	12.5	5.73333	68	11.125	6.11236	71.2555	11.1955	6.47626	China	Mixed
348	YE107	69.3333	8.48333	8.24796	57.8333	9.55	6.05867	70	8.83333	7.92453	67.8	8.66	7.8291	70.6786	8.95391	7.94725	China	Mixed
349	YE478	66.3333	7.66667	8.65234	66.3333	10.1333	6.56289	74	8.83333	8.37736	70	10.24	6.83594	73.1694	9.23779	8.0274	China	Mixed
350	YE488	69.8333	8.38333	8.34232	67	10.3667	6.46657	NA	NA	NA	NA	NA	NA	75.405	9.41057	8.11655	China	Mixed
351	YE515	64.1667	7.18333	8.93072	68.6667	7.81667	8.84566	60.6667	8.16667	7.42857	69	8	8.625	70.157	8.03917	8.76614	China	Mixed
352	YE52106	64.6667	10.1667	6.38149	66	10.7333	6.18217	59.3333	10.6667	5.5625	56.8	12.18	4.66338	66.8125	10.6845	6.37011	China	NSS
353	YE8001	82.6667	8.71667	9.47805	74.3333	10.4667	7.18279	73.6667	7.16667	10.2791	72.8	7.78	9.35733	78.877	8.66371	9.29908	China	Mixed
354	YU374	79.3333	8.5	9.33333	55	8.2	6.96457	73.3333	9.33333	7.85714	68.6	8.36	8.20574	73.0842	8.71629	8.44552	China	NSS
355	YU87-1	74	7.9	9.40744	67.1667	10.8	6.21844	82.6667	6.83333	12.0976	82.8	9.36	8.84615	79.5518	8.82143	9.35974	China	NSS
356	Z2018F	63.3333	8.75	7.23839	66	9.05	7.32088	67.3333	9.73333	6.91781	61.2	10.06	6.0835	69.1671	9.38919	7.40565	China	Mixed
357	ZB648	65.1667	8.21667	7.93	69.6667	8.43333	8.3479	75	8.5	8.82353	72.4	8.66	8.36028	74.3573	8.59432	8.68382	China	NSS
358	ZH68	63.1667	7.23333	8.73267	60.1667	9.06667	6.64469	71.6667	8.83333	8.11321	72.8	8.42	8.64608	71.2853	8.53965	8.39569	China	SS
359	ZHENG22	76	9.73333	7.84611	68.8333	10.3667	6.6161	75.3333	11.3333	6.64706	71.2	9.96	7.14859	76.2989	10.1883	7.55946	China	Mixed
360	ZHENG28	45.6667	4.05	11.3677	54.5	8.55	6.37222	80	9.83333	8.13559	79.8	9.62	8.29522	69.6163	8.22422	8.8398	China	NSS
361	ZHENG29	59.8333	8.15	7.38905	68.3333	10.0667	6.78826	64.6667	10	6.46667	65	9.32	6.97425	69.1607	9.37868	7.41864	China	Mixed
362	ZHENG30	62.1667	8.18333	7.73045	68.3333	9.13333	7.4969	81	8	10.125	77.8	7.48	10.4011	75.8603	8.37983	9.18209	China	NSS
363	ZHENG32	61.8333	7.18333	8.69763	59.5	8.48333	7.14398	66	7.5	8.8	65.75	7.54	8.72016	68.1495	7.94034	8.66216	China	SS
364	ZHENG35	63.8333	7.55	8.48207	61.3333	10.0167	6.16009	67	8.83333	7.58491	75.2	9.18	8.19172	71.1895	8.96652	8.02307	China	Mixed
365	ZHENG58	66	8.36667	7.87665	66.8333	8.93333	7.48361	76	9.66667	7.86207	72.4	8.2	8.82927	74.1423	8.88031	8.37836	China	NSS
366	ZHENG653	65.4167	8.45	7.74393	66.3333	8.88333	7.46993	68	8.2	8.29268	63.4	7.5	8.45333	70.2933	8.4303	8.3567	China	NSS
367	ZHI41	61.3333	7.95	7.75308	49.6667	8.38333	5.92218	65.3333	9.5	6.87719	64	9.08	7.04846	65.4351	8.82563	7.41431	China	NSS
368	ZHONG69	81	10.7833	7.51175	73.1667	9.11667	8.36371	86.3333	10.1667	8.4918	79.8	10.18	7.8389	82.4599	9.94855	8.41086	China	Mixed
369	ZI330	61.8333	7.26667	8.48058	59.6667	7.61667	7.84761	78.6667	8.66667	9.07692	NA	NA	NA	72.1418	8.18555	8.80336	China	NSS
370	ZZ01	63	6.43333	9.81634	61.5	6.3	9.79402	75.3333	10.1667	7.40984	75	8.04	9.32836	72.7798	7.99081	9.30991	China	NSS
371	ZZ03	69.1667	7.18333	9.63445	71.6667	8.11667	8.84321	81.6667	7.83333	10.4255	83.2	8.3	10.0241	79.3538	8.09385	9.86668	China	NSS

## Sheet: Appendix B
Appendix B. Leaf length data of 233 plants in the F₂ maize population.
Index	595	596	597	598	599	600	601	602	603	604	605	606	607	608	609
1	75	80	78	82	70	81	87	88	92	67	82	88	63	77	78
2	76	79	-	77	90	73	81	82	82	77	78	91	84	81	94
3	79	54.5	70	-	87	88	83	-	68	80	92	71	90	79	75
4	83	75	89	100	71	84	84	81	88	-	76	78	84	72	80
5	92	69	79	83	81	85	89	-	83	78	83	84	74	66	72
6	-	87	70	84	82	87	81	-	87	84	84	90	98	84	86
7	86	82	81	77	81	70	77	82	83	86	95	84	89	92	83
8	86	84	69	89	84	93	79	87	85	80	74	78	78	82	72
9	86	95	84	79	88	97	84	83	85	96	93	88	86	56	46
10	71	80	-	74	85	99	72	88	81	73	68.5	90	89	80	72
11	81	-	-	89	77	86	94	66	89	76	80	91	77	92	92
12	86	74	84	76	71	77	-	72	87	88	80	93	83	66	84
13	68	82	84	77	-	73	95	83	66	90	83	86	77	87	93
14	83	90	84	70	74	-	85	-	76	86	68	79	74	71	64
15	78	84	73	-	77	87	86	-	75	77	83	78	72	87	78
16	81	93	80	-	-	87	86	-	74	82	-	86	85	81	81
17	78	78	89	-	-	80	-	-	72	70	-	86	82	-	-
18	87	-	83	-	-	-	-	-	-	88	-	-	-	-	-
19	88	-	-	-	-	-	-	-	-	-	-	-	-	-	-
20	-	-	80	-	-	-	-	-	-	-	-	-	-	-	-

## Sheet: Appendix C
Appendix C. Leaf width data of 223 plants in the F₂ maize population.
Index	595	596	597	598	599	600	601	602	603	604	605	606	607	608	609
1	11.8	12.3	-	12.1	12.3	8.5	12.2	10.1	11.4	10.2	11.2	12	12.2	10.3	11.8
2	10.3	10.8	8.6	12.3	10.3	-	10.2	9.3	10.5	11.2	12.1	10.5	9.8	9.7	10.8
3	11.2	10.3	10.1	11.7	-	10.6	9.8	11.1	-	12.1	10.8	8.8	12.2	11.1	-
4	13.2	10.4	-	12.6	9.8	9.8	11.8	13.1	-	-	9.8	12	9.8	10	-
5	9.5	9.6	11.6	11.1	11.3	10.4	9.8	11.3	6.8	11.3	12.4	11.1	10	8.7	10
6	10.8	9.8	10.5	-	10.9	9.1	9.8	11.1	11.1	10.4	0	10.1	12.4	9.4	10.6
7	10.7	9.2	12.8	10.9	11.4	10.3	13.2	10.6	11.2	12.1	9.4	9.8	9.6	12.3	11
8	9.5	11.2	9	9.4	11.2	7.8	-	9.3	11.4	10.6	10.1	11.3	11.2	10.1	-
9	10.3	-	9.6	9.5	11.2	9.9	11.8	11	11.2	11.6	9.3	12.6	11.3	11.6	12
10	9.2	-	11.1	12.1	10.1	10.8	12.3	9.2	9.8	11.2	9.8	8.5	10.6	11.1	9.4
11	8.6	11.1	11.2	9.4	11	4.8	-	11.4	11.2	11.5	7.3	11.1	9.2	-	9
12	8	8.6	10.4	10.2	9.2	10.6	11.1	10.6	10.8	10.6	10.1	11.4	-	10.1	10.7
13	12.4	8.8	11.2	10.6	10.5	12.3	-	8.8	9.8	11	-	10.8	9.2	11.6	10.8
14	8	9.1	10	11.2	11.3	8.1	-	-	-	9.3	12.1	11.2	11.2	-	9
15	10.2	10.7	11.1	-	11.4	13.4	-	-	-	11.2	11.6	-	-	-	8.3
16	8.2	10.7	11	11.8	-	-	-	-	10.5	11.8	11.1	-	9.8	10.5	10.4
17	9.6	10.6	12	10	-	-	-	-	9.6	-	-	-	11.8	-	12.1
18	12.3	-	-	8.3	-	-	-	-	10	-	-	-	9.8	-	11.2
19	-	9.7	-	-	-	-	-	-	9.8	-	-	-	-	-	9.3
20	-	9.8	-	-	-	-	-	-	-	-	-	-	-	-	11.1
21	-	12.1	-	-	-	-	-	-	-	-	-	-	-	-	-
22	-	11.6	-	-	-	-	-	-	-	-	-	-	-	-	-

## Sheet: Appendix E
Appendix E. Analysis of variance and heritability estimation for maize leaf morphology (LL, LW and RLW) under different environments.
Components	LL	LW	RLW
VG	36.13	0.78	1.35
VGE	12.59	0.3	0.39
Ve	25.19	0.59	0.83
h	4	4	4
r	2	2	2
H2 =VG /（VG + VGE /h +Ve/hr）	0.85	0.84	0.87

## Sheet: Appendix F
Appendix F. Gene associated with LL, LW and RLW identified based on the Q+K model.
QTN	QTL	R2	Chr.	Pos	Model/Method	Trait	Candidate genes	Functional annotation
chr5.s_34116676	QTL1	0.14151	5	34116676	Q+K	LL_22YY	Zm00001d014145	Zm00001d014145		#REF!
							Zm00001d014146	Hsp20/alpha crystallin family protein		#REF!
							Zm00001d014147	Zm00001d014147
							Zm00001d014148	Vacuolar protein sorting-associated protein 41 homolog
chr5.s_34116867			5	34116867	Q+K	LL_22YY	Zm00001d014145	Zm00001d014145
							Zm00001d014146	Hsp20/alpha crystallin family protein
							Zm00001d014147	Zm00001d014147
							Zm00001d014148	Vacuolar protein sorting-associated protein 41 homolog
chr8.s_21360314	QTL2	0.19839	8	21360314	Q+K	LL_22YY	Zm00001d008812	C3H47 C3H type transcription factor
							Zm00001d008814	Aldehyde dehydrogenase family 7 member A1
							Zm00001d008815	Putative aurora-related protein kinase family protein%253B Serine/threonine-protein kinase Eg2-like
							Zm00001d008816	ATP-dependent 6-phosphofructokinase 4 chloroplastic
chr8.s_21360512			8	21360512	Q+K	LL_22YY	Zm00001d008812	C3H47 C3H type transcription factor
							Zm00001d008814	Aldehyde dehydrogenase family 7 member A1
							Zm00001d008815	Putative aurora-related protein kinase family protein%253B Serine/threonine-protein kinase Eg2-like
							Zm00001d008816	ATP-dependent 6-phosphofructokinase 4 chloroplastic
chr8.s_21360607			8	21360607	Q+K	LL_22YY	Zm00001d008812	C3H47 C3H type transcription factor
							Zm00001d008814	Aldehyde dehydrogenase family 7 member A1
							Zm00001d008815	Putative aurora-related protein kinase family protein%253B Serine/threonine-protein kinase Eg2-like
							Zm00001d008816	ATP-dependent 6-phosphofructokinase 4 chloroplastic
chr8.s_22500435	QTL3	0.07362	8	22500435	Q+K	LL_22YY	Zm00001d008844	Zm00001d008844
							Zm00001d008845	Pre-mRNA-processing-splicing factor 8A
							Zm00001d008847	nucleosome/chromatin assembly factor D110
							Zm00001d008849	OSJNBa0089E12.13 protein%3B protein
							Zm00001d008850	Late embryogenesis abundant (LEA) hydroxyproline-rich glycoprotein family
							Zm00001d008843	Grx_A2-glutaredoxin subgroup III
							Zm00001d008846	Glutaminyl-tRNA synthetase
chr8.s_141407032	QTL4	0.05907	8	141407032	Q+K	LL_22YY	Zm00001d011162	Ras-related protein RABD2c
							Zm00001d011163	Zm00001d011163
							Zm00001d011164	Zm00001d011164
chr8.s_175509974	QTL5	0.06108	8	175509974	Q+K	LL_22YY	Zm00001d012495	GDSL esterase/lipase
							Zm00001d012496	Zm00001d012496
							Zm00001d012497	Retrotransposon-like protein
							Zm00001d012498	Transcription repressor OFP1
							Zm00001d012499	2-oxoglutarate (2OG) and Fe(II)-dependent oxygenase superfamily protein
							Zm00001d012500	Putative RING zinc finger domain superfamily protein
							Zm00001d012501	Endoplasmic reticulum vesicle transporter protein
							Zm00001d012503	Nucleic acid-binding OB-fold-like protein
chr9.s_87391267	QTL6	0.05612	9	87391267	Q+K	LL_22YY	Zm00001d046400	Adenine nucleotide transporter BT1 chloroplastic/mitochondrial
chr1.s_202353287	QTL7	0.07131	1	202353287	Q+K	LL_22ZY	Zm00001d031805	Gibberellin receptor GID1L2
							Zm00001d031806	Zm00001d031806
chr3.s_215652433	QTL8	0.05968	3	215652433	Q+K	LL_22ZY	Zm00001d043984	Integral membrane protein-like
							Zm00001d043985	3-5 exonuclease/ nucleic acid binding protein
							Zm00001d043986	Pyruvate kinase
							Zm00001d043988	chitinase chem5
							Zm00001d043989	F-box/kelch-repeat protein
							Zm00001d043990	Calcium-dependent lipid-binding (CaLB domain) family protein
chr5.s_28906707	QTL9	0.16701	5	28906707	Q+K	LL_22ZY	Zm00001d014017	Zm00001d014017
							Zm00001d014019	Probable eukaryotic translation initiation factor 5-2
chr5.s_28906786			5	28906786	Q+K	LL_22ZY	Zm00001d014017	Zm00001d014017
							Zm00001d014019	Probable eukaryotic translation initiation factor 5-2
chr5.s_28907853			5	28907853	Q+K	LL_22ZY	Zm00001d014017	Zm00001d014017
							Zm00001d014019	Probable eukaryotic translation initiation factor 5-2
chr1.s_97416445	QTL10	0.07167	1	97416445	Q+K	LL-11HB	Zm00001d029983	Beta-amylase 3 chloroplastic
chr1.s_108727605	QTL11	0.07888	1	108727605	Q+K	LL-11HB	Zm00001d030148	Zm00001d030148
							Zm00001d030149	ATP-dependent Clp protease proteolytic subunit
chr2.s_1419746	QTL12	0.12686	2	1419746	Q+K	LL-11HB	Zm00001d001813	Protein kinase superfamily protein
							Zm00001d001814	Clathrin light chain 2
							Zm00001d001817	Probable polyol transporter 4
							Zm00001d001818	Probable polyol transporter 4
							Zm00001d001819	N-acetylglucosaminylphosphatidylinositol de-N-acetylase family protein
							Zm00001d001820	protochlorophyllide reductase1
chr2.s_1426031			2	1426031	Q+K	LL-11HB	Zm00001d001813	Protein kinase superfamily protein
							Zm00001d001814	Clathrin light chain 2
							Zm00001d001817	Probable polyol transporter 4
							Zm00001d001818	Probable polyol transporter 4
							Zm00001d001819	N-acetylglucosaminylphosphatidylinositol de-N-acetylase family protein
							Zm00001d001820	protochlorophyllide reductase1
chr2.s_210946110	QTL13	0.06894	2	210946110	Q+K	LL-11HB	Zm00001d006555	60S ribosomal protein L38
							Zm00001d006556	Zm00001d006556
							Zm00001d006557	AT1G07810 (E%3D9e-053) ECA1 ATECA1 ACA3 | ECA1 (ER-TYPE CA2+-ATPASE 1)%3B calcium-transporting ATPase
							Zm00001d006559	Zm00001d006559
							Zm00001d006560	Zm00001d006560
							Zm00001d006562	Pentatricopeptide repeat-containing protein
							Zm00001d006563	Chaperone protein dnaJ 3
							Zm00001d006561	DUF538 family protein
chr2.s_240513658	QTL14	0.06212	2	240513658	Q+K	LL-11HB	Zm00001d007828	Probable flavin-containing monooxygenase 1
							Zm00001d007830	Leucine-rich repeat extensin-like protein 6
							Zm00001d007831	Bifunctional inhibitor/lipid-transfer protein/seed storage 2S albumin superfamily protein
							Zm00001d007834	Zm00001d007834
							Zm00001d007835	FRIGIDA-like protein 4a
							Zm00001d007832	Bifunctional inhibitor/lipid-transfer protein/seed storage 2S albumin superfamily protein
chr5.s_220156273	QTL15	0.14643	5	220156273	Q+K	LL-11HB	Zm00001d018406	MGD2
							Zm00001d018407	Zm00001d018407
							Zm00001d018408	Vesicle-associated membrane protein 711
							Zm00001d018409	26S protease regulatory subunit 6A homolog A
chr5.s_220156275			5	220156275	Q+K	LL-11HB	Zm00001d018406	MGD2
							Zm00001d018407	Zm00001d018407
							Zm00001d018408	Vesicle-associated membrane protein 711
							Zm00001d018409	26S protease regulatory subunit 6A homolog A
chr6.s_150932159	QTL16	0.18015	6	150932159	Q+K	LL-11HB	Zm00001d038187	Zm00001d038187
							Zm00001d038189	FAD/NAD(P)-binding oxidoreductase family protein
chr6.s_150932184			6	150932184	Q+K	LL-11HB	Zm00001d038187	Zm00001d038187
							Zm00001d038189	FAD/NAD(P)-binding oxidoreductase family protein
chr6.s_150932232			6	150932232	Q+K	LL-11HB	Zm00001d038187	Zm00001d038187
							Zm00001d038189	FAD/NAD(P)-binding oxidoreductase family protein
chr10.s_37084066	QTL17	0.07711	10	37084066	Q+K	LL-11HB	Zm00001d024016	zinc finger (Ran-binding) family protein
							Zm00001d024017	P-loop containing nucleoside triphosphate hydrolases superfamily protein
							Zm00001d024018	P-loop containing nucleoside triphosphate hydrolases superfamily protein
chr1.s_20106665	QTL18	0.24651	1	20106665	Q+K	LL-12HB	Zm00001d028007	Calmodulin-binding transcription activator 2
							Zm00001d028008	Probable mitochondrial adenine nucleotide transporter BTL2
chr1.s_20106683			1	20106683	Q+K	LL-12HB	Zm00001d028007	Calmodulin-binding transcription activator 2
							Zm00001d028008	Probable mitochondrial adenine nucleotide transporter BTL2
chr1.s_20106684			1	20106684	Q+K	LL-12HB	Zm00001d028007	Calmodulin-binding transcription activator 2
							Zm00001d028008	Probable mitochondrial adenine nucleotide transporter BTL2
chr1.s_20106776			1	20106776	Q+K	LL-12HB	Zm00001d028007	Calmodulin-binding transcription activator 2
							Zm00001d028008	Probable mitochondrial adenine nucleotide transporter BTL2
chr1.s_53583179	QTL19	0.13695	1	53583179	Q+K	LL-12HB	Zm00001d028984	Myb-related protein 2
							Zm00001d028986	WUSCHEL-related homeobox 11
chr1.s_53583184			1	53583184	Q+K	LL-12HB	Zm00001d028984	Myb-related protein 2
							Zm00001d028986	WUSCHEL-related homeobox 11
chr1.s_259653030	QTL20	0.14436	1	259653030	Q+K	LL-12HB	Zm00001d033341	Zm00001d033341
							Zm00001d033342	Zm00001d033342
							Zm00001d033340	QWRF motif-containing protein 6
							Zm00001d033344	BTB/POZ domain-containing protein NPY2
chr1.s_259653662			1	259653662	Q+K	LL-12HB	Zm00001d033341	Zm00001d033341
							Zm00001d033342	Zm00001d033342
							Zm00001d033340	QWRF motif-containing protein 6
							Zm00001d033344	BTB/POZ domain-containing protein NPY2
chr2.s_1426031	QTL21	0.06426	2	1426031	Q+K	LL-11HB	Zm00001d001813	Protein kinase superfamily protein
							Zm00001d001814	Clathrin light chain 2
							Zm00001d001817	Probable polyol transporter 4
							Zm00001d001818	Probable polyol transporter 4
							Zm00001d001819	N-acetylglucosaminylphosphatidylinositol de-N-acetylase family protein
							Zm00001d001820	protochlorophyllide reductase1
chr3.s_9777683	QTL22	0.0613	3	9777683	Q+K	LL-12HB	Zm00001d039634	dwarf plant1
							Zm00001d039635	BES1/BZR1 homolog protein 4
							Zm00001d039637	Myb family transcription factor EFM
							Zm00001d039636	Zm00001d039636
chr5.s_41106866	QTL23	0.21514	5	41106866	Q+K	LL-12HB	Zm00001d014328	Zm00001d014328
							Zm00001d014331	Probable mitochondrial adenine nucleotide transporter BTL2
							Zm00001d014332	Zm00001d014332
							Zm00001d014333	Zm00001d014333
							Zm00001d014327	Chloride conductance regulatory protein ICln
							Zm00001d014329	Zm00001d014329
							Zm00001d014330	Ras-related small GTP-binding family protein
chr5.s_41106911			5	41106911	Q+K	LL-12HB	Zm00001d014328	Zm00001d014328
							Zm00001d014331	Probable mitochondrial adenine nucleotide transporter BTL2
							Zm00001d014332	Zm00001d014332
							Zm00001d014333	Zm00001d014333
							Zm00001d014327	Chloride conductance regulatory protein ICln
							Zm00001d014329	Zm00001d014329
							Zm00001d014330	Ras-related small GTP-binding family protein
chr5.s_41107007			5	41107007	Q+K	LL-12HB	Zm00001d014328	Zm00001d014328
							Zm00001d014331	Probable mitochondrial adenine nucleotide transporter BTL2
							Zm00001d014332	Zm00001d014332
							Zm00001d014333	Zm00001d014333
							Zm00001d014327	Chloride conductance regulatory protein ICln
							Zm00001d014329	Zm00001d014329
							Zm00001d014330	Ras-related small GTP-binding family protein
chr6.s_88267885	QTL24	0.0647	6	88267885	Q+K	LL-12HB	Zm00001d036432	GCIP-interacting family protein
							Zm00001d036433	DUF2361 family protein
							Zm00001d036434	Zm00001d036434
chr7.s_34633900	QTL25	0.08075	7	34633900	Q+K	LL-12HB	Zm00001d019457	CASP-like protein 1D1
chr8.s_132234667	QTL26	0.12533	8	132234667	Q+K	LL-12HB	Zm00001d010885	Zm00001d010885
							Zm00001d010888	Zm00001d010888
							Zm00001d010887	Serine/threonine-protein phosphatase BSL1
chr8.s_132244098			8	132244098	Q+K	LL-12HB	Zm00001d010885	Zm00001d010885
							Zm00001d010888	Zm00001d010888
							Zm00001d010887	Serine/threonine-protein phosphatase BSL1
chr10.s_37083891	QTL27	0.15311	10	37083891	Q+K	LL-12HB	Zm00001d024016	zinc finger (Ran-binding) family protein
							Zm00001d024017	P-loop containing nucleoside triphosphate hydrolases superfamily protein
							Zm00001d024018	P-loop containing nucleoside triphosphate hydrolases superfamily protein
chr10.s_37084066			10	37084066	Q+K	LL-11HB	Zm00001d024016	zinc finger (Ran-binding) family protein
							Zm00001d024017	P-loop containing nucleoside triphosphate hydrolases superfamily protein
							Zm00001d024018	P-loop containing nucleoside triphosphate hydrolases superfamily protein
chr1.s_53583076	QTL28	0.199	1	53583076	Q+K	LL_BLUP	Zm00001d028984	Myb-related protein 2
							Zm00001d028986	WUSCHEL-related homeobox 11
chr1.s_53583179			1	53583179	Q+K	LL-12HB	Zm00001d028984	Myb-related protein 2
							Zm00001d028986	WUSCHEL-related homeobox 11
chr1.s_53583184			1	53583184	Q+K	LL-12HB	Zm00001d028984	Myb-related protein 2
							Zm00001d028986	WUSCHEL-related homeobox 11
chr1.s_259653030	QTL29	0.07041	1	259653030	Q+K	LL-12HB	Zm00001d033341	Zm00001d033341
							Zm00001d033342	Zm00001d033342
							Zm00001d033340	QWRF motif-containing protein 6
							Zm00001d033344	BTB/POZ domain-containing protein NPY2
chr1.s_263621545	QTL30	0.05762	1	263621545	Q+K	LL_BLUP	Zm00001d033470	cytochrome P450 family 87 subfamily A polypeptide 2
							Zm00001d033471	Putative DNA-binding protein
							Zm00001d033472	TATA-binding protein1
chr1.s_267763167	QTL31	0.06703	1	267763167	Q+K	LL_BLUP	Zm00001d033580	indol-3-ylacetyl glucosyl transferase1
							Zm00001d033583	Germin-like protein subfamily T member 1
chr5.s_212789635	QTL32	0.07364	5	212789635	Q+K	LL_BLUP	Zm00001d018045	Transcription factor TCP14
							Zm00001d018046	Protein POLLEN DEFECTIVE IN GUIDANCE 1
							Zm00001d018047	B-block binding subunit of TFIIIC
chr6.s_150932159	QTL33	0.18015	6	150932159	Q+K	LL-11HB	Zm00001d038187	Zm00001d038187
							Zm00001d038189	FAD/NAD(P)-binding oxidoreductase family protein
chr6.s_150932184			6	150932184	Q+K	LL-11HB	Zm00001d038187	Zm00001d038187
							Zm00001d038189	FAD/NAD(P)-binding oxidoreductase family protein
chr6.s_150932232			6	150932232	Q+K	LL-11HB	Zm00001d038187	Zm00001d038187
							Zm00001d038189	FAD/NAD(P)-binding oxidoreductase family protein
chr8.s_21360314	QTL34	0.0694	8	21360314	Q+K	LL_22YY	Zm00001d008812	C3H47 C3H type transcription factor
							Zm00001d008814	Aldehyde dehydrogenase family 7 member A1
							Zm00001d008815	Putative aurora-related protein kinase family protein%253B Serine/threonine-protein kinase Eg2-like
							Zm00001d008816	ATP-dependent 6-phosphofructokinase 4 chloroplastic
chr8.s_171064941	QTL35	0.05739	8	171064941	Q+K	LL_BLUP	Zm00001d012252	Strictosidine synthase 1
							Zm00001d012253	Zm00001d012253
							Zm00001d012255	Putative MYB DNA-binding domain superfamily protein
							Zm00001d012251	5'-3' exonuclease family protein
							Zm00001d012254	Putative patellin family protein
chr9.s_87391267	QTL36	0.05612	9	87391267	Q+K	LL_22YY	Zm00001d046400	Adenine nucleotide transporter BT1 chloroplastic/mitochondrial
chr1.s_219089961	QTL37	0.26782	1	219089961	Q+K	LW_22YY	Zm00001d032253	Type IV inositol polyphosphate 5-phosphatase 9
							Zm00001d032255	Zm00001d032255
chr1.s_219226915			1	219226915	Q+K	LW_22YY	Zm00001d032257	Aminoaldehyde dehydrogenase 1b
							Zm00001d032260	Beta-adaptin-like protein C
chr1.s_219228282			1	219228282	Q+K	LW_22YY	Zm00001d032257	Aminoaldehyde dehydrogenase 1b
							Zm00001d032260	Beta-adaptin-like protein C
chr1.s_219228543			1	219228543	Q+K	LW_22YY	Zm00001d032257	Aminoaldehyde dehydrogenase 1b
							Zm00001d032260	Beta-adaptin-like protein C
chr2.s_2110302	QTL38	0.06321	2	2110302	Q+K	LW_22YY	Zm00001d001864	Uracil-DNA glycosylase mitochondrial
							Zm00001d001865	cytokinin response regulator1
							Zm00001d001866	DUF3755 family protein
							Zm00001d001868	Zm00001d001868
							Zm00001d001869	Ubiquitin carboxyl-terminal hydrolase family protein
							Zm00001d001870	Peroxisome biogenesis protein 22
							Zm00001d001871	Zm00001d001871
chr2.s_34607375	QTL39	0.26372	2	34607375	Q+K	LW_22YY	Zm00001d003175	Zm00001d003175
							Zm00001d003176	Protein NLP8
chr2.s_34607457			2	34607457	Q+K	LW_22YY	Zm00001d003175	Zm00001d003175
							Zm00001d003176	Protein NLP8
chr2.s_34607531			2	34607531	Q+K	LW_22YY	Zm00001d003175	Zm00001d003175
							Zm00001d003176	Protein NLP8
chr2.s_34607626			2	34607626	Q+K	LW_22YY	Zm00001d003175	Zm00001d003175
							Zm00001d003176	Protein NLP8
chr2.s_211265456	QTL40	0.07058	2	211265456	Q+K	LW_22YY	Zm00001d006570	Zm00001d006570
							Zm00001d006571	Cellulose synthase-like protein D3
							Zm00001d006573	Eukaryotic translation initiation factor 4G
chr3.s_964323	QTL41	0.14511	3	964323	Q+K	LW_22YY	Zm00001d039278	25.3 kDa vesicle transport protein
							Zm00001d039279	Harpin-induced protein
							Zm00001d039280	Probable ubiquitin-conjugating enzyme E2 25
							Zm00001d039282	Serine/threonine-protein kinase AGC1-5
							Zm00001d039283	Plasma membrane-associated cation-binding protein 1
							Zm00001d039284	Glycosyltransferase-like KOBITO 1
							Zm00001d039274	4-coumarate--CoA ligase-like 1
							Zm00001d039276	Ubiquitin ligase SINAT3
chr3.s_964324			3	964324	Q+K	LW_22YY	Zm00001d039278	25.3 kDa vesicle transport protein
							Zm00001d039279	Harpin-induced protein
							Zm00001d039280	Probable ubiquitin-conjugating enzyme E2 25
							Zm00001d039282	Serine/threonine-protein kinase AGC1-5
							Zm00001d039283	Plasma membrane-associated cation-binding protein 1
							Zm00001d039284	Glycosyltransferase-like KOBITO 1
							Zm00001d039274	4-coumarate--CoA ligase-like 1
							Zm00001d039276	Ubiquitin ligase SINAT3
chr5.s_83049921	QTL42	0.06695	5	83049921	Q+K	LW_22YY	Zm00001d015294	Probable metal-nicotianamine transporter YSL6
chr10.s_94988996	QTL43	0.15987	10	94988996	Q+K	LW_22YY	Zm00001d024919	Adenylate kinase
chr10.s_94989204			10	94989204	Q+K	LW_22YY	Zm00001d024919	Adenylate kinase
chr10.s_148155303	QTL44	0.14809	10	148155303	Q+K	LW_22YY	Zm00001d026557	F-box/kelch-repeat protein
							Zm00001d026558	F-box/kelch-repeat protein
							Zm00001d026559	Phosphatidylinositol 4-kinase gamma 7
							Zm00001d026560	OSJNBa0043A12.15 protein%3B protein%3B Thioredoxin-like protein
							Zm00001d026562	Zm00001d026562
							Zm00001d026563	Ethylene-responsive transcription factor 7
							Zm00001d026569	Putative acyl-ACP thioesterase family protein
							Zm00001d026571	Zm00001d026571
							Zm00001d026572	Carboxylesterase SOBER1
							Zm00001d026573	Methylthioribose kinase
							Zm00001d026567	Zm00001d026567
							Zm00001d026568	Pentatricopeptide repeat-containing protein
chr10.s_148205486			10	148205486	Q+K	LW_22YY	Zm00001d026563	Ethylene-responsive transcription factor 7
							Zm00001d026569	Putative acyl-ACP thioesterase family protein
							Zm00001d026571	Zm00001d026571
							Zm00001d026572	Carboxylesterase SOBER1
							Zm00001d026573	Methylthioribose kinase
							Zm00001d026574	Zm00001d026574
							Zm00001d026575	Reticulon-like protein B11
							Zm00001d026567	Zm00001d026567
							Zm00001d026568	Pentatricopeptide repeat-containing protein
chr2.s_34607457	QTL45	0.07269	2	34607457	Q+K	LW_22YY	Zm00001d003175	Zm00001d003175
							Zm00001d003176	Protein NLP8
chr4.s_7746411	QTL46	0.07842	4	7746411	Q+K	LW_22ZY	Zm00001d048908	RING/FYVE/PHD zinc finger superfamily protein
chr5.s_213825375	QTL47	0.06256	5	213825375	Q+K	LW_22ZY	Zm00001d018073	Zm00001d018073
							Zm00001d018075	Copper ion binding protein
							Zm00001d018076	Zm00001d018076
							Zm00001d018077	Photosynthetic NDH subunit of lumenal location 4 chloroplastic
							Zm00001d018078	Type I inositol polyphosphate 5-phosphatase 5
							Zm00001d018080	Probable beta-D-xylosidase 7
							Zm00001d018074	Aspartic proteinase-like protein 1
							Zm00001d018072	Membrane-anchored ubiquitin-fold protein 6
chr6.s_75122208	QTL48	0.06173	6	75122208	Q+K	LW_22ZY	Zm00001d036159	Phenolic glucoside malonyltransferase 1
							Zm00001d036161	Coatomer subunit beta'-3
chr1.s_88462720	QTL49	0.06593	1	88462720	Q+K	LW-11HB	Zm00001d029820	Cyclin-dependent protein kinase inhibitor SMR1
							Zm00001d029818	Expressed protein%3B protein
chr5.s_59302662	QTL50	0.06932	5	59302662	Q+K	LW-11HB	Zm00001d014690	Auxin response factor 7
							Zm00001d014692	AIG2-like protein
chr5.s_59313773		0.07498	5	59313773	Q+K	LW-11HB	Zm00001d014692	AIG2-like protein
chr1.s_78379627	QTL51	0.06506	1	78379627	Q+K	LW-12HB	Zm00001d029595	zinc-binding protein
							Zm00001d029596	Guanosine nucleotide diphosphate dissociation inhibitor
							Zm00001d029598	Transcription initiation factor TFIID subunit 4b
							Zm00001d029597	Leucine-rich repeat (LRR) family protein
chr1.s_222592828	QTL52	0.07014	1	222592828	Q+K	LW-12HB	Zm00001d032325	Transmembrane amino acid transporter family protein
							Zm00001d032327	Probable transmembrane ascorbate ferrireductase 2
							Zm00001d032328	Protein Dr1 homolog
							Zm00001d032329	Zm00001d032329
							Zm00001d032330	Pyrophosphate-energized vacuolar membrane proton pump 1
							Zm00001d032326	Double-stranded RNA-binding protein 1
chr1.s_305074567	QTL53	0.0732	1	305074567	Q+K	LW-12HB	Zm00001d034898	gibberellin 20-oxidase1
							Zm00001d034899	25.3 kDa vesicle transport protein
							Zm00001d034900	PGR5-like protein 1B chloroplastic
chr3.s_29749383	QTL54	0.06234	3	29749383	Q+K	LW-12HB	Zm00001d040161	Peroxisomal membrane protein PEX14
							Zm00001d040162	Zm00001d040162
chr3.s_111443703	QTL55	0.07096	3	111443703	Q+K	LW-12HB	Zm00001d041307	Serine/threonine-protein phosphatase BSL3
							Zm00001d041308	K(+) efflux antiporter 3 chloroplastic
							Zm00001d041309	Probable cyclic nucleotide-gated ion channel 5
							Zm00001d041310	Zm00001d041310
chr3.s_219039230	QTL56	0.0695	3	219039230	Q+K	LW-12HB	Zm00001d044095	Beta carbonic anhydrase 4
							Zm00001d044096	carbonic anhydrase3
							Zm00001d044099	carbonic anhydrase1
							Zm00001d044100	DUF1645 family protein
chr3.s_223074722	QTL57	0.06111	3	223074722	Q+K	LW-12HB	Zm00001d044250	Carbamoyl-phosphate synthase large chain chloroplastic
							Zm00001d044253	IQ domain-containing protein IQM5
							Zm00001d044254	ZmGR2c protein
							Zm00001d044251	RNA polymerase III subunit RPC82 family protein
							Zm00001d044255	Ribosomal protein L34
chr4.s_195792787	QTL58	0.08359	4	195792787	Q+K	LW-12HB	Zm00001d052647	Zm00001d052647
							Zm00001d052648	Putative MADS-box transcription factor family protein
							Zm00001d052649	Zm00001d052649
							Zm00001d052651	Probable xyloglucan endotransglucosylase/hydrolase protein 5
chr6.s_48041478	QTL59	0.06299	6	48041478	Q+K	LW-12HB	Zm00001d035776	Paired amphipathic helix protein Sin3-like 3
chr8.s_165287776	QTL60	0.05946	8	165287776	Q+K	LW-12HB	Zm00001d011959	Secondary cell wall glycosyltransferase family 47
							Zm00001d011963	ATP-dependent RNA helicase DHX8
							Zm00001d011965	Aldolase-type TIM barrel family protein
							Zm00001d011966	Ubiquitin carrier protein%253B Ubiquitin-conjugating enzyme E2-22 kDa
							Zm00001d011967	Zm00001d011967
							Zm00001d011968	Zm00001d011968
							Zm00001d011969	NAC domain containing protein 84
							Zm00001d011964	Probable beta-14-xylosyltransferase IRX10L
chr9.s_106742612	QTL61	0.06328	9	106742612	Q+K	LW-12HB	Zm00001d046810	Transcription initiation factor TFIID subunit 5
chr10.s_13321357	QTL62	0.43917	10	13321357	Q+K	LW-12HB	Zm00001d023639	Alba DNA/RNA-binding protein
							Zm00001d023641	Zm00001d023641
							Zm00001d023640	Ubiquitin carboxyl-terminal hydrolase 13
chr10.s_13321435			10	13321435	Q+K	LW-12HB	Zm00001d023639	Alba DNA/RNA-binding protein
							Zm00001d023641	Zm00001d023641
							Zm00001d023640	Ubiquitin carboxyl-terminal hydrolase 13
chr10.s_13321901			10	13321901	Q+K	LW-12HB	Zm00001d023639	Alba DNA/RNA-binding protein
							Zm00001d023641	Zm00001d023641
							Zm00001d023640	Ubiquitin carboxyl-terminal hydrolase 13
chr10.s_13322091			10	13322091	Q+K	LW-12HB	Zm00001d023639	Alba DNA/RNA-binding protein
							Zm00001d023641	Zm00001d023641
							Zm00001d023640	Ubiquitin carboxyl-terminal hydrolase 13
chr10.s_13327940			10	13327940	Q+K	LW-12HB	Zm00001d023639	Alba DNA/RNA-binding protein
							Zm00001d023641	Zm00001d023641
							Zm00001d023640	Ubiquitin carboxyl-terminal hydrolase 13
chr10.s_13340099			10	13340099	Q+K	LW-12HB	Zm00001d023639	Alba DNA/RNA-binding protein
							Zm00001d023641	Zm00001d023641
							Zm00001d023640	Ubiquitin carboxyl-terminal hydrolase 13
chr10.s_125573001	QTL63	0.07303	10	125573001	Q+K	LW-12HB	Zm00001d025668	hapless 8
chr1.s_219228543	QTL64	0.07453	1	219228543	Q+K	LW_22YY	Zm00001d032257	Aminoaldehyde dehydrogenase 1b
							Zm00001d032260	Beta-adaptin-like protein C
chr3.s_964324	QTL65	0.07704	3	964324	Q+K	LW_22YY	Zm00001d039278	25.3 kDa vesicle transport protein
							Zm00001d039279	Harpin-induced protein
							Zm00001d039280	Probable ubiquitin-conjugating enzyme E2 25
							Zm00001d039282	Serine/threonine-protein kinase AGC1-5
							Zm00001d039283	Plasma membrane-associated cation-binding protein 1
							Zm00001d039284	Glycosyltransferase-like KOBITO 1
							Zm00001d039274	4-coumarate--CoA ligase-like 1
							Zm00001d039276	Ubiquitin ligase SINAT3
chr3.s_114791459	QTL66	0.07844	3	114791459	Q+K	LW_BLUP	Zm00001d041377	Zm00001d041377
							Zm00001d041378	Histone acetyltransferase HAC2
							Zm00001d041379	Zm00001d041379
							Zm00001d041376	Probable transcription factor KAN4
chr3.s_223074722	QTL67	0.06111	3	223074722	Q+K	LW-12HB	Zm00001d044250	Carbamoyl-phosphate synthase large chain chloroplastic
							Zm00001d044253	IQ domain-containing protein IQM5
							Zm00001d044254	ZmGR2c protein
							Zm00001d044251	RNA polymerase III subunit RPC82 family protein
							Zm00001d044255	Ribosomal protein L34
chr4.s_10622019	QTL68	0.05906	4	10622019	Q+K	LW_BLUP	Zm00001d048953	3-ketoacyl-CoA synthase 2
							Zm00001d048954	GDP-mannose 3%252C5-epimerase 2 isoform 1%253B GDP-mannose 3%252C5-epimerase 2 isoform 2
							Zm00001d048956	Zm00001d048956
							Zm00001d048957	Zm00001d048957
chr5.s_59313773	QTL69	0.07498	5	59313773	Q+K	LW-11HB	Zm00001d014692	AIG2-like protein
chr7.s_21929163	QTL70	0.06307	7	21929163	Q+K	LW_BLUP	Zm00001d019207	NAC domain-containing protein 2
							Zm00001d019206	Tryptophan/tyrosine permease
chr8.s_13153135	QTL71	0.0604	8	13153135	Q+K	LW_BLUP	Zm00001d008563	Zm00001d008563
							Zm00001d008564	Surfeit locus protein 5
							Zm00001d008567	glucose translocator1
							Zm00001d008568	Core-2/I-branching beta-16-N-acetylglucosaminyltransferase family protein
							Zm00001d008565	Zm00001d008565
chr9.s_106742612	QTL72	0.06328	9	106742612	Q+K	LW-12HB	Zm00001d046810	Transcription initiation factor TFIID subunit 5
chr1.s_12141317	QTL73	0.19993	1	12141317	Q+K	RLW_22YY	Zm00001d027719	La-related protein 1C
							Zm00001d027720	Heavy metal-associated isoprenylated plant protein 27
							Zm00001d027721	high-affinity nickel-transport family protein
							Zm00001d027723	ABC-2 type transporter family protein
							Zm00001d027722	Cell number regulator 13
chr1.s_12141422			1	12141422	Q+K	RLW_22YY	Zm00001d027719	La-related protein 1C
							Zm00001d027720	Heavy metal-associated isoprenylated plant protein 27
							Zm00001d027721	high-affinity nickel-transport family protein
							Zm00001d027723	ABC-2 type transporter family protein
							Zm00001d027722	Cell number regulator 13
chr1.s_12141512			1	12141512	Q+K	RLW_22YY	Zm00001d027719	La-related protein 1C
							Zm00001d027720	Heavy metal-associated isoprenylated plant protein 27
							Zm00001d027721	high-affinity nickel-transport family protein
							Zm00001d027723	ABC-2 type transporter family protein
							Zm00001d027722	Cell number regulator 13
chr1.s_56920765	QTL74	0.28615	1	56920765	Q+K	RLW_22YY	Zm00001d029064	basic leucine-zipper 52
							Zm00001d029065	Protein LRP16
chr1.s_56920777			1	56920777	Q+K	RLW_22YY	Zm00001d029064	basic leucine-zipper 52
							Zm00001d029065	Protein LRP16
chr1.s_56920871			1	56920871	Q+K	RLW_22YY	Zm00001d029064	basic leucine-zipper 52
							Zm00001d029065	Protein LRP16
chr1.s_56921392			1	56921392	Q+K	RLW_22YY	Zm00001d029064	basic leucine-zipper 52
							Zm00001d029065	Protein LRP16
chr2.s_19086822	QTL75	0.07431	2	19086822	Q+K	RLW_22YY	Zm00001d002678	Prolyl oligopeptidase family protein
							Zm00001d002679	Mechanosensitive ion channel protein 6
							Zm00001d002680	OSJNBa0084K11.8 protein
chr3.s_211081692	QTL76	0.07865	3	211081692	Q+K	RLW_22YY	Zm00001d043829	UDP-glycosyltransferase 84A1
							Zm00001d043830	DUF4228 domain protein
							Zm00001d043832	Zm00001d043832
							Zm00001d043827	S-adenosyl-L-methionine-dependent methyltransferases superfamily protein
							Zm00001d043831	65-kDa microtubule-associated protein 3
chr5.s_196487640	QTL77	0.06155	5	196487640	Q+K	RLW_22YY	Zm00001d017458	Methylglutaconyl-CoA hydratase
							Zm00001d017459	Zm00001d017459
							Zm00001d017461	Zm00001d017461
							Zm00001d017456	ypt homolog4
							Zm00001d017457	Phospholipase A1-Ibeta2 chloroplastic
							Zm00001d017460	Ubiquitin carboxyl-terminal hydrolase 3
chr6.s_3078292	QTL78	0.07683	6	3078292	Q+K	RLW_22YY	Zm00001d035044	KH domain-containing protein
							Zm00001d035046	Non-lysosomal glucosylceramidase
							Zm00001d035049	Zm00001d035049
							Zm00001d035045	Protochlorophyllide-dependent translocon component 52 chloroplastic
							Zm00001d035047	RNA-binding KH domain-containing protein
							Zm00001d035048	Pentatricopeptide repeat-containing protein
chr6.s_3216574	QTL79	0.17832	6	3216574	Q+K	RLW_22YY	Zm00001d035050	Zm00001d035050
							Zm00001d035052	Zm00001d035052
							Zm00001d035051	Ribosome-recycling factor chloroplastic
chr6.s_3217295			6	3217295	Q+K	RLW_22YY	Zm00001d035050	Zm00001d035050
							Zm00001d035052	Zm00001d035052
							Zm00001d035051	Ribosome-recycling factor chloroplastic
chr6.s_118969205	QTL80	0.06505	6	118969205	Q+K	RLW_22YY	Zm00001d037272	Alpha-mannosidase 2
chr7.s_177750897	QTL81	0.06255	7	177750897	Q+K	RLW_22YY	Zm00001d022438	Ubiquinol-cytochrome c reductase complex 6.7 kDa protein
							Zm00001d022439	Vacuolar-sorting receptor 1
							Zm00001d022441	Zm00001d022441
							Zm00001d022440	B3 domain-containing transcription repressor VAL2
							Zm00001d022442	basic leucine-zipper 52
chr10.s_10858629	QTL82	0.06719	10	10858629	Q+K	RLW_22YY	Zm00001d023585	NAD-dependent protein deacylase SRT2
							Zm00001d023587	DNA-directed RNA polymerases II IV and V subunit 10
							Zm00001d023588	Protein kinase protein with adenine nucleotide alpha hydrolases-like domain
							Zm00001d023583	Dynamin-like protein ARC5
chr10.s_94988996	QTL83	0.1374	10	94988996	Q+K	RLW_22YY	Zm00001d024919	Adenylate kinase
chr10.s_94989204			10	94989204	Q+K	RLW_22YY	Zm00001d024919	Adenylate kinase
chr2.s_26280031	QTL84	0.15411	2	26280031	Q+K	RLW_22ZY	Zm00001d002905	Protein kinase superfamily protein
							Zm00001d002904	PLC-like phosphodiesterases superfamily protein
chr2.s_26281816			2	26281816	Q+K	RLW_22ZY	Zm00001d002905	Protein kinase superfamily protein
							Zm00001d002904	PLC-like phosphodiesterases superfamily protein
chr4.s_39122841	QTL85	0.05805	4	39122841	Q+K	RLW_22ZY	Zm00001d049662	glycine-rich protein
							Zm00001d049664	Zm00001d049664
							Zm00001d049663	Cation/H(+) antiporter 14
chr7.s_21929163	QTL86	0.06407	7	21929163	Q+K	RLW_22ZY	Zm00001d019207	NAC domain-containing protein 2
							Zm00001d019206	Tryptophan/tyrosine permease
chr7.s_177750145	QTL87	0.06289	7	177750145	Q+K	RLW_22ZY	Zm00001d022438	Ubiquinol-cytochrome c reductase complex 6.7 kDa protein
							Zm00001d022439	Vacuolar-sorting receptor 1
							Zm00001d022441	Zm00001d022441
							Zm00001d022440	B3 domain-containing transcription repressor VAL2
							Zm00001d022442	basic leucine-zipper 52
chr1.s_39593012	QTL88	0.05894	1	39593012	Q+K	RLW-11HB	Zm00001d028576	fringe-related protein
							Zm00001d028575	Tropinone reductase
chr2.s_29277707	QTL89	0.05843	2	29277707	Q+K	RLW-11HB	Zm00001d003003	OSJNBa0019D11.18 protein%3B protein
							Zm00001d003004	Zm00001d003004
							Zm00001d003005	Os04g0521200 protein
							Zm00001d003006	Aquaporin PIP2-5
							Zm00001d003007	Pentatricopeptide repeat (PPR) superfamily protein
							Zm00001d003002	IAA-amino acid hydrolase ILR1-like 3
chr5.s_63233531	QTL90	0.32389	5	63233531	Q+K	RLW-11HB	Zm00001d014789	protein%3B Receptor-like protein kinase-like
chr5.s_63345079			5	63345079	Q+K	RLW-11HB	Zm00001d014790	Chaperone protein dnaJ 11
							Zm00001d014791	Pathogenesis-related thaumatin superfamily protein
							Zm00001d014792	shepherd-like1
chr5.s_63345209			5	63345209	Q+K	RLW-11HB	Zm00001d014790	Chaperone protein dnaJ 11
							Zm00001d014791	Pathogenesis-related thaumatin superfamily protein
							Zm00001d014792	shepherd-like1
chr5.s_63345210			5	63345210	Q+K	RLW-11HB	Zm00001d014790	Chaperone protein dnaJ 11
							Zm00001d014791	Pathogenesis-related thaumatin superfamily protein
							Zm00001d014792	shepherd-like1
chr5.s_63345337			5	63345337	Q+K	RLW-11HB	Zm00001d014790	Chaperone protein dnaJ 11
							Zm00001d014791	Pathogenesis-related thaumatin superfamily protein
							Zm00001d014792	shepherd-like1
chr5.s_85046341	QTL91	0.06293	5	85046341	Q+K	RLW-11HB	Zm00001d015334	CRIB domain-containing protein RIC10
							Zm00001d015335	Zm00001d015335
chr5.s_165228087	QTL92	0.27968	5	165228087	Q+K	RLW-12HB	Zm00001d016505	F-box protein
chr5.s_165228089			5	165228089	Q+K	RLW-12HB	Zm00001d016505	F-box protein
chr5.s_165228093			5	165228093	Q+K	RLW-12HB	Zm00001d016505	F-box protein
chr5.s_165228094			5	165228094	Q+K	RLW-12HB	Zm00001d016505	F-box protein
chr8.s_168734733	QTL93	0.06015	8	168734733	Q+K	RLW-12HB	Zm00001d012137	Protein kinase
							Zm00001d012140	Probable carboxylesterase 11
							Zm00001d012141	Protein PLASTID TRANSCRIPTIONALLY ACTIVE 10
							Zm00001d012138	Protein NRT1/ PTR FAMILY 8.1
							Zm00001d012142	Acid phosphatase/vanadium-dependent haloperoxidase-related protein
chr9.s_23323192	QTL94	0.07399	9	23323192	Q+K	RLW-12HB	Zm00001d045468	alpha/beta-Hydrolases superfamily protein
chr10.s_26984500	QTL95	0.2236	10	26984500	Q+K	RLW-12HB	Zm00001d023897	VIN3-like protein 1
chr2.s_26280031			2	26280031	Q+K	RLW_22ZY	Zm00001d002905	Protein kinase superfamily protein
							Zm00001d002904	PLC-like phosphodiesterases superfamily protein
chr2.s_26281816			2	26281816	Q+K	RLW_22ZY	Zm00001d002905	Protein kinase superfamily protein
							Zm00001d002904	PLC-like phosphodiesterases superfamily protein
chr6.s_3216574	QTL96	0.10543	6	3216574	Q+K	RLW_22YY	Zm00001d035050	Zm00001d035050
							Zm00001d035052	Zm00001d035052
							Zm00001d035051	Ribosome-recycling factor chloroplastic
chr8.s_168734733	QTL97	0.06015	8	168734733	Q+K	RLW-12HB	Zm00001d012137	Protein kinase
							Zm00001d012140	Probable carboxylesterase 11
							Zm00001d012141	Protein PLASTID TRANSCRIPTIONALLY ACTIVE 10
							Zm00001d012138	Protein NRT1/ PTR FAMILY 8.1
							Zm00001d012142	Acid phosphatase/vanadium-dependent haloperoxidase-related protein

## Sheet: Appendix G
Appendix G. Significant SNP for LL, LW and RLW based on Single_env, QEI and QQI analyses of the 3V model.
Model	Trait	Marker	Chromosome	Position (bp)	LOD	R2(%)	P-value
3V_single	LW_BLUP	chr1.s_2109138	1	2109138	7.3272	0.893	6.29391e-09
3V_single	RLW_BLUP	chr1.s_7033163	1	7033163	9.8598	1.4802	1.60258e-11
3V_single	YY_RLW	chr1.s_7180340	1	7180340	13.4796	1.1324	3.30844e-15
3V_single	LW_BLUP	chr1.s_10350408	1	10350408	3.36	0.4338	8.37092e-05
3V_single	RLW_BLUP	chr1.s_12141422	1	12141422	12.6883	1.065	2.10713e-14
3V_single	LW_BLUP	chr1.s_12359089	1	12359089	32.2996	1.3857	3.26893e-34
3V_single	LL_BLUP	chr1.s_17724410	1	17724410	11.004	0.7463	1.09095e-12
3V_single	LW_BLUP	chr1.s_22267276	1	22267276	9.4642	1.2037	4.06459e-11
3V_single	YY_RLW	chr1.s_24297478	1	24297478	9.8699	1.26	1.56523e-11
3V_single	YY_LL	chr1.s_29165212	1	29165212	3.9307	0.7048	2.09489e-05
3V_single	LL_BLUP	chr1.s_29165514	1	29165514	11.6642	1.7034	2.31956e-13
3V_single	YY_LW	chr1.s_34541157	1	34541157	23.6093	1.1308	1.86825e-25
3V_single	ZY_LW	chr1.s_35252337	1	35252337	9.2732	1.4978	6.37116e-11
3V_single	YY_LW	chr1.s_38082910	1	38082910	10.2777	1.3098	6.00249e-12
3V_single	LL_BLUP	chr1.s_39398013	1	39398013	14.0596	0.455	8.52619e-16
3V_single	LW_BLUP	chr1.s_47586662	1	47586662	8.177	0.9485	8.44266e-10
3V_single	ZY_LL	chr1.s_57266031	1	57266031	7.1785	1.7358	8.95028e-09
3V_single	LW_BLUP	chr1.s_95249003	1	95249003	24.6157	0.5398	1.80393e-26
3V_single	YY_RLW	chr1.s_103638204	1	103638204	4.3596	0.5984	7.44312e-06
3V_single	ZY_RLW	chr1.s_128273148	1	128273148	10.163	0.892	7.85964e-12
3V_single	ZY_LW	chr1.s_150288418	1	150288418	6.6165	0.9415	3.39273e-08
3V_single	ZY_RLW	chr1.s_162239447	1	162239447	11.648	0.8497	2.40928e-13
3V_single	ZY_LW	chr1.s_171822710	1	171822710	12.3693	0.9951	4.44618e-14
3V_single	ZY_RLW	chr1.s_191516120	1	191516120	14.1792	1.0508	6.44812e-16
3V_single	LL_BLUP	chr1.s_191820168	1	191820168	9.9182	1.1534	1.39714e-11
3V_single	ZY_LW	chr1.s_192063139	1	192063139	12.4726	0.7177	3.49079e-14
3V_single	ZY_LL	chr1.s_195608692	1	195608692	7.518	1.7278	4.00677e-09
3V_single	LL_BLUP	chr1.s_195608692	1	195608692	15.1379	2.124	6.87003e-17
3V_single	YY_LL	chr1.s_195611498	1	195611498	4.2805	0.6881	9.00418e-06
3V_single	ZY_LL	chr1.s_197179565	1	197179565	20.3933	1.4746	3.3001e-22
3V_single	YY_RLW	chr1.s_198043688	1	198043688	4.6697	0.5438	3.53113e-06
3V_single	LW_BLUP	chr1.s_198272496	1	198272496	13.8916	1.0574	1.26286e-15
3V_single	YY_LL	chr1.s_200052443	1	200052443	19.2449	0.8964	4.77731e-21
3V_single	LL_BLUP	chr1.s_211945822	1	211945822	9.4165	1.1846	4.5474e-11
3V_single	YY_LW	chr1.s_219228543	1	219228543	32.3716	1.5913	2.76671e-34
3V_single	ZY_RLW	chr1.s_227429233	1	227429233	11.658	1.8331	2.35342e-13
3V_single	LL_BLUP	chr1.s_237900612	1	237900612	13.0747	1.3646	8.53003e-15
3V_single	ZY_RLW	chr1.s_244395502	1	244395502	5.3883	0.7929	6.31619e-07
3V_single	LL_BLUP	chr1.s_255244464	1	255244464	3.4853	0.5021	6.1693e-05
3V_single	YY_LW	chr1.s_255514192	1	255514192	4.8574	0.7462	2.25031e-06
3V_single	YY_LW	chr1.s_261761652	1	261761652	19.8981	1.9393	1.04449e-21
3V_single	YY_RLW	chr1.s_261761652	1	261761652	15.0692	1.2821	8.06418e-17
3V_single	YY_LL	chr1.s_264463123	1	264463123	7.2322	1.4087	7.88114e-09
3V_single	YY_LW	chr1.s_271747873	1	271747873	6.1076	0.665	1.137e-07
3V_single	LW_BLUP	chr1.s_281356355	1	281356355	15.3713	1.2511	3.98388e-17
3V_single	YY_LL	chr1.s_281980433	1	281980433	7.357	1.1259	5.86427e-09
3V_single	ZY_RLW	chr1.s_283692288	1	283692288	11.0826	1.2971	9.07255e-13
3V_single	RLW_BLUP	chr1.s_286209090	1	286209090	19.0004	3.3613	8.4423e-21
3V_single	ZY_LL	chr1.s_287024650	1	287024650	11.001	1.615	1.09866e-12
3V_single	ZY_RLW	chr1.s_293290973	1	293290973	15.4552	1.5296	3.27567e-17
3V_single	RLW_BLUP	chr1.s_293313358	1	293313358	9.9636	1.3165	1.2558e-11
3V_single	YY_RLW	chr1.s_293313360	1	293313360	10.6911	1.1593	2.2737e-12
3V_single	ZY_LW	chr1.s_294664659	1	294664659	9.7622	1.0268	2.01634e-11
3V_single	RLW_BLUP	chr1.s_302144359	1	302144359	14.2206	1.8773	5.85341e-16
3V_single	YY_RLW	chr1.s_302248498	1	302248498	9.0317	0.7003	1.12504e-10
3V_single	ZY_LL	chr1.s_306290696	1	306290696	6.7032	1.6182	2.76146e-08
3V_single	LL_BLUP	chr2.s_3094120	2	3094120	7.8312	1.1651	1.91074e-09
3V_single	ZY_LL	chr2.s_12285976	2	12285976	6.2889	0.8574	7.38714e-08
3V_single	RLW_BLUP	chr2.s_13637515	2	13637515	10.1298	1.4628	8.49587e-12
3V_single	YY_RLW	chr2.s_14920446	2	14920446	6.838	0.4358	2.00565e-08
3V_single	LL_BLUP	chr2.s_14924981	2	14924981	13.8849	1.159	1.28278e-15
3V_single	RLW_BLUP	chr2.s_15191229	2	15191229	6.8015	1.2391	2.18703e-08
3V_single	YY_LL	chr2.s_16407073	2	16407073	15.1794	1.7453	6.23583e-17
3V_single	YY_RLW	chr2.s_19086822	2	19086822	15.6477	2.5385	2.08977e-17
3V_single	RLW_BLUP	chr2.s_19086822	2	19086822	3.6615	0.6402	4.02137e-05
3V_single	ZY_LW	chr2.s_19814496	2	19814496	8.9853	1.4364	1.25491e-10
3V_single	LW_BLUP	chr2.s_19968983	2	19968983	4.3126	0.6443	8.33501e-06
3V_single	ZY_LW	chr2.s_20536670	2	20536670	9.8003	0.5427	1.84348e-11
3V_single	ZY_RLW	chr2.s_24822611	2	24822611	9.646	1.0663	2.65011e-11
3V_single	ZY_RLW	chr2.s_26280031	2	26280031	10.0083	0.6163	1.13045e-11
3V_single	RLW_BLUP	chr2.s_26280031	2	26280031	10.6243	0.6141	2.65957e-12
3V_single	YY_LW	chr2.s_28067860	2	28067860	14.6147	1.1608	2.33123e-16
3V_single	LW_BLUP	chr2.s_28067860	2	28067860	13.7684	1.063	1.68439e-15
3V_single	ZY_LW	chr2.s_29299648	2	29299648	6.8355	0.6958	2.01761e-08
3V_single	YY_LW	chr2.s_34607457	2	34607457	56.1675	3.056	3.37679e-58
3V_single	LW_BLUP	chr2.s_34607457	2	34607457	19.932	0.7872	9.65232e-22
3V_single	YY_RLW	chr2.s_36448231	2	36448231	13.8543	1.1758	1.37796e-15
3V_single	RLW_BLUP	chr2.s_38437541	2	38437541	19.6692	0.6567	1.77934e-21
3V_single	YY_LW	chr2.s_45757480	2	45757480	5.0206	0.9228	1.52211e-06
3V_single	YY_LL	chr2.s_48478104	2	48478104	6.6998	0.709	2.78367e-08
3V_single	YY_RLW	chr2.s_49527634	2	49527634	18.2754	0.7984	4.56721e-20
3V_single	YY_RLW	chr2.s_56952733	2	56952733	14.919	1.2049	1.14527e-16
3V_single	ZY_RLW	chr2.s_85731849	2	85731849	9.0119	1.3462	1.17895e-10
3V_single	ZY_LW	chr2.s_107017990	2	107017990	16.606	0.8305	2.23532e-18
3V_single	YY_RLW	chr2.s_144518682	2	144518682	7.9571	0.9512	1.41908e-09
3V_single	YY_RLW	chr2.s_163306171	2	163306171	16.3197	1.1314	4.35742e-18
3V_single	LW_BLUP	chr2.s_163306171	2	163306171	35.4442	2.8925	2.23902e-37
3V_single	RLW_BLUP	chr2.s_163306171	2	163306171	14.7709	1.1887	1.61849e-16
3V_single	YY_RLW	chr2.s_182515381	2	182515381	31.3721	1.3916	2.80655e-33
3V_single	YY_RLW	chr2.s_194929404	2	194929404	12.1392	1.3823	7.62067e-14
3V_single	RLW_BLUP	chr2.s_194929404	2	194929404	17.5891	2.4151	2.25949e-19
3V_single	ZY_RLW	chr2.s_198166152	2	198166152	5.8303	0.8421	2.20049e-07
3V_single	LL_BLUP	chr2.s_203275361	2	203275361	6.611	0.8136	3.43736e-08
3V_single	ZY_LL	chr2.s_214217187	2	214217187	16.4576	2.4367	3.15947e-18
3V_single	ZY_LL	chr2.s_218158711	2	218158711	4.7779	0.7577	2.72361e-06
3V_single	YY_LL	chr2.s_224447477	2	224447477	20.3231	3.9088	3.8856e-22
3V_single	LW_BLUP	chr2.s_225806434	2	225806434	4.7491	0.5983	2.91839e-06
3V_single	ZY_LL	chr2.s_225924141	2	225924141	7.8391	2.0044	1.87529e-09
3V_single	LL_BLUP	chr2.s_227258775	2	227258775	6.8134	0.9741	2.1263e-08
3V_single	ZY_RLW	chr2.s_229625840	2	229625840	7.3182	1.1402	6.42914e-09
3V_single	ZY_LW	chr2.s_231003919	2	231003919	10.0474	1.2515	1.03126e-11
3V_single	LL_BLUP	chr2.s_231768205	2	231768205	4.4568	0.5069	5.89048e-06
3V_single	YY_LL	chr2.s_239428681	2	239428681	4.5502	0.6936	4.70483e-06
3V_single	YY_LL	chr2.s_244255386	2	244255386	20.5248	1.026	2.43055e-22
3V_single	YY_LW	chr3.s_964324	3	964324	6.4175	0.5092	5.44147e-08
3V_single	YY_RLW	chr3.s_3811590	3	3811590	10.4448	0.9935	4.05367e-12
3V_single	ZY_LL	chr3.s_5024649	3	5024649	6.1425	0.9928	1.04638e-07
3V_single	ZY_LW	chr3.s_6123622	3	6123622	9.5871	0.7512	3.04335e-11
3V_single	YY_RLW	chr3.s_8286079	3	8286079	9.0872	0.5065	9.87246e-11
3V_single	LW_BLUP	chr3.s_14752241	3	14752241	6.552	0.5402	3.95364e-08
3V_single	YY_LL	chr3.s_16789388	3	16789388	10.8136	1.0489	1.70517e-12
3V_single	YY_LW	chr3.s_18639935	3	18639935	12.0363	0.7451	9.69958e-14
3V_single	ZY_LL	chr3.s_24229121	3	24229121	20.2974	1.9531	4.1248e-22
3V_single	LL_BLUP	chr3.s_24229121	3	24229121	7.2568	0.3647	7.43527e-09
3V_single	YY_LW	chr3.s_31720497	3	31720497	11.2388	1.404	6.28828e-13
3V_single	YY_RLW	chr3.s_31840876	3	31840876	7.3717	0.5896	5.66389e-09
3V_single	RLW_BLUP	chr3.s_31840876	3	31840876	5.49	0.5028	4.95471e-07
3V_single	YY_RLW	chr3.s_39650123	3	39650123	8.1515	1.1523	8.96568e-10
3V_single	YY_RLW	chr3.s_40037061	3	40037061	14.9548	1.1179	1.05341e-16
3V_single	ZY_LW	chr3.s_103772162	3	103772162	30.6871	1.257	1.37375e-32
3V_single	ZY_LW	chr3.s_114791459	3	114791459	9.4844	1.2578	3.87539e-11
3V_single	ZY_RLW	chr3.s_114791459	3	114791459	4.005	0.5324	1.75073e-05
3V_single	LW_BLUP	chr3.s_114791459	3	114791459	9.7945	1.1722	1.86869e-11
3V_single	RLW_BLUP	chr3.s_114796636	3	114796636	22.1393	2.3741	5.68972e-24
3V_single	YY_LW	chr3.s_125032879	3	125032879	5.3149	0.6507	7.52761e-07
3V_single	YY_RLW	chr3.s_132167109	3	132167109	28.3727	1.3206	2.9443e-30
3V_single	ZY_LW	chr3.s_152437773	3	152437773	7.1778	0.5162	8.96452e-09
3V_single	RLW_BLUP	chr3.s_153596312	3	153596312	5.0287	0.4271	1.49271e-06
3V_single	LW_BLUP	chr3.s_163390839	3	163390839	6.9793	1.0045	1.43483e-08
3V_single	YY_LL	chr3.s_164367833	3	164367833	18.0479	0.9812	7.7595e-20
3V_single	ZY_RLW	chr3.s_174102806	3	174102806	9.9058	1.5047	1.43861e-11
3V_single	YY_LL	chr3.s_175271082	3	175271082	12.2951	1.07	5.29056e-14
3V_single	YY_RLW	chr3.s_176035563	3	176035563	7.6773	0.9462	2.7494e-09
3V_single	ZY_RLW	chr3.s_183448416	3	183448416	13.7663	0.9057	1.69257e-15
3V_single	RLW_BLUP	chr3.s_183448416	3	183448416	7.3023	0.4291	6.67612e-09
3V_single	ZY_RLW	chr3.s_187243021	3	187243021	7.8913	1.4609	1.65784e-09
3V_single	YY_RLW	chr3.s_192837025	3	192837025	7.6122	0.6077	3.20691e-09
3V_single	LW_BLUP	chr3.s_196246101	3	196246101	18.5301	1.6503	2.52378e-20
3V_single	ZY_LL	chr3.s_203801413	3	203801413	25.6954	1.7448	1.46996e-27
3V_single	ZY_LW	chr3.s_204482622	3	204482622	5.9392	0.7893	1.69754e-07
3V_single	ZY_LW	chr3.s_206033787	3	206033787	18.6295	1.0317	2.00221e-20
3V_single	ZY_LL	chr3.s_215648677	3	215648677	7.7082	1.2782	2.55546e-09
3V_single	LL_BLUP	chr3.s_215648677	3	215648677	6.8683	0.6567	1.86671e-08
3V_single	YY_LW	chr3.s_220049443	3	220049443	40.466	1.2478	1.99498e-42
3V_single	ZY_RLW	chr3.s_221273042	3	221273042	4.9345	0.8682	1.87058e-06
3V_single	LW_BLUP	chr3.s_221273042	3	221273042	7.4906	1.1796	4.2749e-09
3V_single	ZY_RLW	chr3.s_221488158	3	221488158	4.9246	0.7716	1.91571e-06
3V_single	LW_BLUP	chr3.s_221505569	3	221505569	8.3722	0.57	5.32545e-10
3V_single	YY_RLW	chr3.s_227120346	3	227120346	17.0564	1.3986	7.821e-19
3V_single	YY_LL	chr3.s_227493714	3	227493714	12.5459	0.6826	2.94079e-14
3V_single	YY_LW	chr3.s_231495312	3	231495312	15.245	0.7738	5.34941e-17
3V_single	LL_BLUP	chr3.s_233000271	3	233000271	39.8378	1.8587	8.54082e-42
3V_single	ZY_LW	chr3.s_234340320	3	234340320	7.2359	1.1847	7.81162e-09
3V_single	ZY_LW	chr4.s_3228022	4	3228022	9.2356	1.551	6.96142e-11
3V_single	ZY_LL	chr4.s_6234473	4	6234473	16.9934	2.219	9.0576e-19
3V_single	ZY_LW	chr4.s_7746411	4	7746411	52.259	2.0459	2.83388e-54
3V_single	YY_LL	chr4.s_10621904	4	10621904	18.068	2.3877	7.40315e-20
3V_single	ZY_RLW	chr4.s_12248991	4	12248991	4.3997	0.4712	6.75799e-06
3V_single	YY_RLW	chr4.s_17250490	4	17250490	17.0682	1.05	7.60922e-19
3V_single	RLW_BLUP	chr4.s_17250490	4	17250490	8.9681	0.5988	1.3069e-10
3V_single	ZY_LW	chr4.s_17367138	4	17367138	9.2052	0.7492	7.47684e-11
3V_single	RLW_BLUP	chr4.s_27571303	4	27571303	8.258	1.2474	6.97284e-10
3V_single	YY_LL	chr4.s_48240185	4	48240185	8.3675	0.7268	5.38582e-10
3V_single	RLW_BLUP	chr4.s_48240185	4	48240185	11.7061	0.9836	2.10262e-13
3V_single	YY_LW	chr4.s_77745452	4	77745452	25.6886	1.4992	1.4934e-27
3V_single	YY_LL	chr4.s_145904868	4	145904868	6.3418	1.027	6.51489e-08
3V_single	LL_BLUP	chr4.s_149278401	4	149278401	12.1228	0.729	7.91967e-14
3V_single	YY_LW	chr4.s_154926132	4	154926132	12.5739	1.2963	2.7542e-14
3V_single	ZY_RLW	chr4.s_154980965	4	154980965	7.5073	0.6264	4.10974e-09
3V_single	LW_BLUP	chr4.s_162529489	4	162529489	6.9594	1.1411	1.50389e-08
3V_single	LL_BLUP	chr4.s_163363643	4	163363643	8.0609	0.3083	1.11049e-09
3V_single	RLW_BLUP	chr4.s_164209781	4	164209781	12.9258	1.3278	1.2086e-14
3V_single	LW_BLUP	chr4.s_164595469	4	164595469	3.8474	0.5091	2.56297e-05
3V_single	LW_BLUP	chr4.s_168928548	4	168928548	17.5859	2.3767	2.27649e-19
3V_single	YY_LW	chr4.s_173799686	4	173799686	32.3205	1.2544	3.11477e-34
3V_single	YY_LW	chr4.s_178306190	4	178306190	6.5342	0.6377	4.12421e-08
3V_single	ZY_LW	chr4.s_178306190	4	178306190	9.4048	0.9901	4.67387e-11
3V_single	ZY_LW	chr4.s_180321038	4	180321038	18.8316	1.1446	1.25068e-20
3V_single	YY_RLW	chr4.s_184617978	4	184617978	10.7174	0.4371	2.1376e-12
3V_single	ZY_LW	chr4.s_189230004	4	189230004	21.4362	1.0965	2.91752e-23
3V_single	LL_BLUP	chr4.s_208054081	4	208054081	8.9797	0.9835	1.27184e-10
3V_single	YY_LL	chr4.s_212087026	4	212087026	16.9294	3.8926	1.05153e-18
3V_single	ZY_RLW	chr4.s_214746027	4	214746027	31.7033	1.6218	1.30232e-33
3V_single	LW_BLUP	chr4.s_233914406	4	233914406	9.5261	0.5759	3.51347e-11
3V_single	ZY_LL	chr4.s_239036727	4	239036727	33.9834	2.1746	6.60425e-36
3V_single	LL_BLUP	chr4.s_241646628	4	241646628	23.0913	0.8554	6.22518e-25
3V_single	ZY_LL	chr4.s_242394560	4	242394560	18.1251	1.9716	6.48114e-20
3V_single	ZY_LW	chr4.s_242559397	4	242559397	20.8635	1.375	1.10541e-22
3V_single	LW_BLUP	chr4.s_242703823	4	242703823	31.0882	2.4816	5.41962e-33
3V_single	ZY_LW	chr4.s_242704464	4	242704464	9.0541	0.6657	1.06735e-10
3V_single	YY_RLW	chr5.s_1763763	5	1763763	11.7511	1.1398	1.89201e-13
3V_single	ZY_LL	chr5.s_2865447	5	2865447	9.6594	1.0175	2.56767e-11
3V_single	LL_BLUP	chr5.s_2865447	5	2865447	8.2024	0.5066	7.95104e-10
3V_single	RLW_BLUP	chr5.s_8016584	5	8016584	16.3753	1.3011	3.82755e-18
3V_single	YY_LW	chr5.s_8685551	5	8685551	8.822	0.7322	1.84419e-10
3V_single	YY_LL	chr5.s_11126012	5	11126012	8.7298	1.059	2.29189e-10
3V_single	RLW_BLUP	chr5.s_12704068	5	12704068	5.4388	0.8726	5.59826e-07
3V_single	ZY_RLW	chr5.s_28986352	5	28986352	5.589	0.8681	3.91185e-07
3V_single	LL_BLUP	chr5.s_28986352	5	28986352	9.4378	1.2666	4.32526e-11
3V_single	YY_LL	chr5.s_34116867	5	34116867	31.5994	2.6056	1.65708e-33
3V_single	RLW_BLUP	chr5.s_54309336	5	54309336	19.5574	0.9628	2.30815e-21
3V_single	YY_LW	chr5.s_54728507	5	54728507	16.1302	0.9196	6.78038e-18
3V_single	YY_LW	chr5.s_83049921	5	83049921	11.8992	1.519	1.3374e-13
3V_single	ZY_RLW	chr5.s_174492610	5	174492610	14.6731	0.956	2.03375e-16
3V_single	ZY_LL	chr5.s_179259254	5	179259254	27.5441	5.7938	2.01292e-29
3V_single	LL_BLUP	chr5.s_182320621	5	182320621	10.9845	1.3283	1.14184e-12
3V_single	ZY_LW	chr5.s_197151867	5	197151867	38.2802	1.2617	3.14514e-40
3V_single	ZY_RLW	chr5.s_201225711	5	201225711	6.9027	1.1134	1.72045e-08
3V_single	ZY_LW	chr5.s_205899972	5	205899972	5.5917	1.0364	3.88692e-07
3V_single	YY_LW	chr5.s_210535525	5	210535525	5.8193	0.69	2.25862e-07
3V_single	ZY_LW	chr5.s_212630253	5	212630253	6.7756	0.7704	2.32592e-08
3V_single	LW_BLUP	chr5.s_213836244	5	213836244	14.2246	2.7109	5.79829e-16
3V_single	ZY_RLW	chr5.s_213840744	5	213840744	8.3517	0.9696	5.59e-10
3V_single	LW_BLUP	chr5.s_219143296	5	219143296	14.3135	1.0176	4.71137e-16
3V_single	ZY_LW	chr6.s_2945035	6	2945035	7.7005	1.1843	2.60257e-09
3V_single	LW_BLUP	chr6.s_2945035	6	2945035	5.0277	0.6818	1.49629e-06
3V_single	ZY_RLW	chr6.s_4852631	6	4852631	5.8377	0.979	2.16191e-07
3V_single	LW_BLUP	chr6.s_55313558	6	55313558	24.8761	0.9326	9.85294e-27
3V_single	ZY_LW	chr6.s_67785411	6	67785411	11.0569	1.2453	9.63563e-13
3V_single	ZY_LW	chr6.s_70207064	6	70207064	12.3912	0.7159	4.22448e-14
3V_single	LW_BLUP	chr6.s_70244948	6	70244948	27.3639	1.7097	3.05821e-29
3V_single	YY_RLW	chr6.s_79692923	6	79692923	6.6332	1.0732	3.26066e-08
3V_single	YY_LL	chr6.s_91585432	6	91585432	21.624	1.2575	1.88521e-23
3V_single	YY_RLW	chr6.s_100160116	6	100160116	15.7537	0.9481	1.63217e-17
3V_single	ZY_RLW	chr6.s_101127788	6	101127788	15.4824	0.4975	3.07375e-17
3V_single	ZY_RLW	chr6.s_113634440	6	113634440	13.2849	0.8391	5.21677e-15
3V_single	YY_RLW	chr6.s_118969205	6	118969205	30.4186	3.8604	2.56002e-32
3V_single	RLW_BLUP	chr6.s_118969205	6	118969205	7.792	0.9894	2.09602e-09
3V_single	YY_LW	chr6.s_119043908	6	119043908	5.8847	0.5982	1.93301e-07
3V_single	ZY_LL	chr6.s_136194674	6	136194674	3.692	0.8693	3.73495e-05
3V_single	LL_BLUP	chr6.s_153454363	6	153454363	17.809	0.9262	1.35377e-19
3V_single	YY_LW	chr6.s_158357800	6	158357800	19.0406	0.9694	7.68676e-21
3V_single	YY_LL	chr6.s_162605408	6	162605408	18.0898	0.7494	7.03761e-20
3V_single	ZY_LL	chr6.s_163222774	6	163222774	15.0103	1.334	9.25358e-17
3V_single	YY_LL	chr6.s_163375336	6	163375336	10.4702	0.6988	3.81868e-12
3V_single	LL_BLUP	chr6.s_166089199	6	166089199	5.9648	0.8483	1.59717e-07
3V_single	LW_BLUP	chr7.s_4281155	7	4281155	3.7999	0.4489	2.87538e-05
3V_single	LL_BLUP	chr7.s_5404536	7	5404536	6.6506	0.8219	3.12841e-08
3V_single	YY_LW	chr7.s_5871421	7	5871421	19.0673	1.1324	7.22434e-21
3V_single	RLW_BLUP	chr7.s_6344372	7	6344372	11.6804	0.8694	2.23311e-13
3V_single	ZY_RLW	chr7.s_6435818	7	6435818	36.9992	1.8783	6.1078e-39
3V_single	ZY_LW	chr7.s_16183289	7	16183289	12.7062	1.7644	2.02053e-14
3V_single	ZY_RLW	chr7.s_16183289	7	16183289	8.2012	1.149	7.97453e-10
3V_single	RLW_BLUP	chr7.s_21929163	7	21929163	6.5689	0.9491	3.7986e-08
3V_single	LL_BLUP	chr7.s_28496944	7	28496944	16.8454	0.6637	1.27895e-18
3V_single	YY_RLW	chr7.s_45207234	7	45207234	9.9802	0.4895	1.2076e-11
3V_single	LW_BLUP	chr7.s_48008308	7	48008308	8.5663	1.1155	3.3694e-10
3V_single	YY_LL	chr7.s_95435844	7	95435844	5.0614	0.7698	1.3803e-06
3V_single	RLW_BLUP	chr7.s_97213607	7	97213607	7.8582	1.4684	1.79245e-09
3V_single	LL_BLUP	chr7.s_119465390	7	119465390	5.5788	0.5089	4.00846e-07
3V_single	ZY_LL	chr7.s_122132208	7	122132208	11.5429	1.3812	3.0826e-13
3V_single	ZY_LL	chr7.s_141949997	7	141949997	5.7533	1.5012	2.6438e-07
3V_single	YY_LL	chr7.s_143115968	7	143115968	7.7636	1.356	2.24162e-09
3V_single	ZY_RLW	chr7.s_146495440	7	146495440	9.2459	1.6499	6.79357e-11
3V_single	RLW_BLUP	chr7.s_153735063	7	153735063	15.8011	0.8935	1.46119e-17
3V_single	LW_BLUP	chr7.s_159795452	7	159795452	5.82	0.5228	2.25527e-07
3V_single	ZY_RLW	chr7.s_161599639	7	161599639	4.9283	0.7882	1.89889e-06
3V_single	LL_BLUP	chr7.s_164316104	7	164316104	5.5202	0.7271	4.60999e-07
3V_single	YY_LW	chr7.s_164994822	7	164994822	18.2317	1.1451	5.05611e-20
3V_single	ZY_LL	chr7.s_165501274	7	165501274	9.4793	1.622	3.92283e-11
3V_single	LW_BLUP	chr7.s_175011450	7	175011450	7.7497	1.2871	2.31667e-09
3V_single	ZY_LW	chr7.s_175849536	7	175849536	9.7918	1.8005	1.88078e-11
3V_single	ZY_LL	chr7.s_176069451	7	176069451	21.375	1.6648	3.36377e-23
3V_single	ZY_RLW	chr7.s_177750145	7	177750145	22.5564	1.44	2.15802e-24
3V_single	ZY_LW	chr7.s_177750897	7	177750897	29.3843	1.6744	2.81777e-31
3V_single	LW_BLUP	chr7.s_177750897	7	177750897	32.9418	1.6949	7.38032e-35
3V_single	RLW_BLUP	chr7.s_177750897	7	177750897	24.6811	1.3323	1.54971e-26
3V_single	ZY_LL	chr7.s_179472118	7	179472118	9.5502	2.6362	3.31994e-11
3V_single	YY_LL	chr8.s_13343562	8	13343562	7.542	1.1587	3.78601e-09
3V_single	YY_LW	chr8.s_13646053	8	13646053	12.1119	0.9635	8.12534e-14
3V_single	ZY_RLW	chr8.s_13723322	8	13723322	5.5253	0.7169	4.55411e-07
3V_single	RLW_BLUP	chr8.s_14171542	8	14171542	43.9491	1.7379	6.29861e-46
3V_single	ZY_LW	chr8.s_15003463	8	15003463	24.1449	1.9812	5.3839e-26
3V_single	YY_LW	chr8.s_15104173	8	15104173	16.7662	0.7788	1.53856e-18
3V_single	ZY_LW	chr8.s_17462021	8	17462021	25.0984	1.5925	5.87923e-27
3V_single	ZY_RLW	chr8.s_20368027	8	20368027	37.9566	2.0981	6.6535e-40
3V_single	YY_LL	chr8.s_21360314	8	21360314	11.4796	2.0393	3.57582e-13
3V_single	LL_BLUP	chr8.s_21360314	8	21360314	6.9131	0.9613	1.67867e-08
3V_single	LL_BLUP	chr8.s_22500435	8	22500435	10.0025	1.3119	1.146e-11
3V_single	YY_LW	chr8.s_25929480	8	25929480	7.0591	1.32	1.18761e-08
3V_single	LL_BLUP	chr8.s_82092240	8	82092240	10.8312	0.9137	1.6365e-12
3V_single	YY_LW	chr8.s_108543199	8	108543199	5.9683	0.9346	1.58386e-07
3V_single	RLW_BLUP	chr8.s_123058175	8	123058175	3.3909	0.5458	7.76318e-05
3V_single	ZY_LL	chr8.s_128182758	8	128182758	20.3554	0.7852	3.60425e-22
3V_single	LW_BLUP	chr8.s_142567935	8	142567935	19.5818	0.5381	2.18069e-21
3V_single	ZY_LW	chr8.s_143825492	8	143825492	3.5695	0.6806	5.02816e-05
3V_single	YY_RLW	chr8.s_156536495	8	156536495	60.6826	2.1103	9.92822e-63
3V_single	ZY_LW	chr8.s_157650435	8	157650435	3.4167	0.5636	7.29063e-05
3V_single	RLW_BLUP	chr8.s_157748555	8	157748555	4.8029	0.7096	2.56476e-06
3V_single	LL_BLUP	chr8.s_161260988	8	161260988	15.3707	1.4552	3.98969e-17
3V_single	YY_LL	chr8.s_162442547	8	162442547	11.7887	0.5	1.73255e-13
3V_single	LW_BLUP	chr8.s_163680192	8	163680192	7.1196	0.4957	1.02887e-08
3V_single	YY_LL	chr8.s_167838199	8	167838199	7.5956	1.2171	3.33519e-09
3V_single	ZY_RLW	chr8.s_168668474	8	168668474	10.2912	1.9113	5.81539e-12
3V_single	LW_BLUP	chr8.s_170472283	8	170472283	19.1222	1.3854	6.35696e-21
3V_single	YY_LW	chr8.s_170472303	8	170472303	16.357	1.2231	3.99501e-18
3V_single	YY_LL	chr8.s_172052962	8	172052962	8.441	0.5955	4.52798e-10
3V_single	ZY_RLW	chr8.s_174306248	8	174306248	6.5523	0.7288	3.95122e-08
3V_single	YY_LW	chr8.s_174857070	8	174857070	7.7267	0.8522	2.44594e-09
3V_single	YY_LL	chr8.s_175509974	8	175509974	7.607	1.513	3.24609e-09
3V_single	RLW_BLUP	chr8.s_178936542	8	178936542	6.1551	0.9228	1.0154e-07
3V_single	YY_LL	chr9.s_5078910	9	5078910	14.3439	0.6196	4.38794e-16
3V_single	LL_BLUP	chr9.s_5078910	9	5078910	36.9516	1.4844	6.8195e-39
3V_single	YY_LL	chr9.s_6853934	9	6853934	18.1675	0.5735	5.87287e-20
3V_single	LL_BLUP	chr9.s_25065669	9	25065669	7.7284	1.0688	2.43618e-09
3V_single	RLW_BLUP	chr9.s_25850629	9	25850629	7.9815	0.8017	1.33955e-09
3V_single	LL_BLUP	chr9.s_39945407	9	39945407	17.3512	0.6853	3.93407e-19
3V_single	ZY_RLW	chr9.s_69701219	9	69701219	10.2122	1.0373	7.00144e-12
3V_single	ZY_LL	chr9.s_70090456	9	70090456	6.0564	1.4655	1.28441e-07
3V_single	YY_LL	chr9.s_77717444	9	77717444	10.9588	1.6059	1.21281e-12
3V_single	RLW_BLUP	chr9.s_81787853	9	81787853	15.2358	1.1222	5.46615e-17
3V_single	YY_RLW	chr9.s_86540731	9	86540731	9.4024	0.6727	4.70016e-11
3V_single	LL_BLUP	chr9.s_87391267	9	87391267	18.4813	2.5279	2.82739e-20
3V_single	YY_LL	chr9.s_109468254	9	109468254	13.4362	0.8162	3.66199e-15
3V_single	LL_BLUP	chr9.s_109468254	9	109468254	27.8134	1.4758	1.07779e-29
3V_single	LW_BLUP	chr9.s_113241362	9	113241362	13.4933	0.7918	3.20426e-15
3V_single	ZY_LW	chr9.s_122521921	9	122521921	15.9333	1.5302	1.07341e-17
3V_single	YY_RLW	chr9.s_124158386	9	124158386	17.3305	2.5997	4.12857e-19
3V_single	YY_LL	chr9.s_127177683	9	127177683	29.2246	2.0597	4.08129e-31
3V_single	LL_BLUP	chr9.s_127177683	9	127177683	31.918	1.8873	7.91712e-34
3V_single	RLW_BLUP	chr9.s_131498075	9	131498075	11.1246	1.258	8.22004e-13
3V_single	LW_BLUP	chr9.s_133469073	9	133469073	27.0691	1.7196	6.06165e-29
3V_single	YY_LW	chr9.s_142796133	9	142796133	6.983	1.24	1.42228e-08
3V_single	ZY_LW	chr9.s_152500730	9	152500730	9.0315	0.9617	1.12558e-10
3V_single	YY_RLW	chr9.s_153413459	9	153413459	8.982	1.3272	1.26499e-10
3V_single	RLW_BLUP	chr9.s_154128970	9	154128970	12.8252	1.3295	1.52935e-14
3V_single	ZY_RLW	chr9.s_154129014	9	154129014	6.0514	0.8564	1.29979e-07
3V_single	ZY_RLW	chr9.s_154459467	9	154459467	7.2017	0.9129	8.47142e-09
3V_single	YY_LW	chr9.s_154593742	9	154593742	15.3821	1.1215	3.88433e-17
3V_single	LW_BLUP	chr9.s_154593819	9	154593819	19.0376	0.8468	7.74038e-21
3V_single	ZY_LW	chr9.s_156673851	9	156673851	13.5171	0.9471	3.03082e-15
3V_single	YY_LW	chr10.s_2565980	10	2565980	4.937	0.7411	1.85958e-06
3V_single	YY_RLW	chr10.s_4212681	10	4212681	12.5083	1.3844	3.21079e-14
3V_single	LW_BLUP	chr10.s_4212681	10	4212681	7.9333	0.8932	1.50105e-09
3V_single	ZY_LW	chr10.s_4281479	10	4281479	4.3147	0.666	8.29203e-06
3V_single	ZY_RLW	chr10.s_4374829	10	4374829	13.4934	1.3059	3.20388e-15
3V_single	ZY_LL	chr10.s_6445999	10	6445999	13.2664	3.0913	5.44693e-15
3V_single	YY_RLW	chr10.s_10858629	10	10858629	5.7377	0.4931	2.74391e-07
3V_single	RLW_BLUP	chr10.s_10858629	10	10858629	10.2499	1.0456	6.40766e-12
3V_single	YY_LW	chr10.s_12733034	10	12733034	10.4242	1.2304	4.25518e-12
3V_single	LL_BLUP	chr10.s_21902780	10	21902780	9.6099	1.299	2.88469e-11
3V_single	YY_LL	chr10.s_40153665	10	40153665	11.0378	1.4104	1.00768e-12
3V_single	ZY_LL	chr10.s_75075402	10	75075402	5.4204	0.8416	5.84998e-07
3V_single	ZY_RLW	chr10.s_79471739	10	79471739	20.9918	3.0825	8.20224e-23
3V_single	RLW_BLUP	chr10.s_79471739	10	79471739	13.3584	1.7785	4.3928e-15
3V_single	YY_LW	chr10.s_83253802	10	83253802	14.3289	2.2614	4.54428e-16
3V_single	YY_RLW	chr10.s_85134199	10	85134199	19.2163	0.9009	5.10662e-21
3V_single	LW_BLUP	chr10.s_93175544	10	93175544	8.3965	0.6814	5.02965e-10
3V_single	ZY_LW	chr10.s_93564609	10	93564609	6.831	0.7936	2.03926e-08
3V_single	YY_LW	chr10.s_94989204	10	94989204	5.2304	0.8636	9.21268e-07
3V_single	YY_RLW	chr10.s_94989204	10	94989204	5.8087	0.8642	2.31691e-07
3V_single	LW_BLUP	chr10.s_94989204	10	94989204	8.0761	1.2823	1.07139e-09
3V_single	RLW_BLUP	chr10.s_94989204	10	94989204	6.407	1.119	5.57926e-08
3V_single	YY_RLW	chr10.s_96967245	10	96967245	24.2583	2.319	4.13701e-26
3V_single	ZY_LW	chr10.s_97406194	10	97406194	7.6729	1.0629	2.77803e-09
3V_single	YY_RLW	chr10.s_97771165	10	97771165	11.4502	0.445	3.83068e-13
3V_single	RLW_BLUP	chr10.s_103653450	10	103653450	22.142	1.2058	5.65408e-24
3V_single	ZY_LL	chr10.s_108514904	10	108514904	11.995	1.0271	1.06849e-13
3V_single	YY_LL	chr10.s_112662492	10	112662492	6.0846	0.8528	1.20091e-07
3V_single	LL_BLUP	chr10.s_118969285	10	118969285	22.4212	1.4079	2.95463e-24
3V_single	ZY_LL	chr10.s_125371135	10	125371135	6.7939	1.4898	2.22689e-08
3V_single	LL_BLUP	chr10.s_125371135	10	125371135	5.8097	0.7575	2.31122e-07
3V_single	YY_LL	chr10.s_132198750	10	132198750	19.0186	1.4786	8.09078e-21
3V_single	LW_BLUP	chr10.s_136228513	10	136228513	23.8508	1.1265	1.066e-25
3V_single	YY_RLW	chr10.s_142315585	10	142315585	11.3935	0.7999	4.3757e-13
3V_single	YY_LL	chr10.s_142364965	10	142364965	5.6008	0.9621	3.80366e-07
3V_single	LL_BLUP	chr10.s_142364965	10	142364965	9.6342	1.3732	2.72449e-11
3V_single	LL_BLUP	chr10.s_142768522	10	142768522	6.3895	0.9407	5.81581e-08
3V_single	ZY_RLW	chr10.s_143632298	10	143632298	25.9091	1.1096	8.95216e-28
3V_single	ZY_LW	chr10.s_144446052	10	144446052	10.0795	1.0097	9.56355e-12
3V_single	YY_LW	chr10.s_144718235	10	144718235	11.0741	1.8349	9.2552e-13
3V_single	YY_RLW	chr10.s_146946005	10	146946005	8.4949	0.3669	3.98704e-10
3V_single	LL_BLUP	chr10.s_147986059	10	147986059	6.8244	0.7626	2.07157e-08
3V_single	YY_LW	chr10.s_148726903	10	148726903	16.9501	0.8537	1.00205e-18
QEI	LL	chr2.s_79612923	2	79612923	24.682	1.8324	2.08425e-25
QEI	LL	chr2.s_176567713	2	176567713	15.9805	1.1791	1.04728e-16
QEI	LL	chr2.s_189507063	2	189507063	27.7965	2.0971	1.60151e-28
QEI	LL	chr3.s_5022783	3	5022783	7.8848	0.5682	1.30478e-08
QEI	LL	chr6.s_100570432	6	100570432	4.6655	0.368	2.161e-05
QEI	LL	chr8.s_175078876	8	175078876	8.2813	0.6335	5.23616e-09
QEI	LL	chr8.s_176105281	8	176105281	12.6834	0.9314	2.07535e-13
QEI	LL	chr8.s_179459808	8	179459808	12.8703	0.9426	1.34965e-13
QEI	LL	chr9.s_90056029	9	90056029	7.0293	0.5241	9.35314e-08
QEI	LW	chr1.s_181576951	1	181576951	7.3849	0.5551	4.12462e-08
QEI	LW	chr1.s_228406353	1	228406353	7.34	0.4767	4.57366e-08
QEI	LW	chr3.s_207414291	3	207414291	8.9394	0.6383	1.1506e-09
QEI	LW	chr4.s_199297171	4	199297171	15.8343	1.0254	1.46663e-16
QEI	LW	chr5.s_53041449	5	53041449	6.0498	0.4045	8.92222e-07
QEI	LW	chr5.s_211154399	5	211154399	5.9189	0.4524	1.20583e-06
QEI	LW	chr6.s_22387967	6	22387967	8.2817	0.5466	5.23155e-09
QEI	LW	chr6.s_99539111	6	99539111	29.9779	1.9428	1.0549e-30
QEI	LW	chr9.s_120959253	9	120959253	6.8692	0.4315	1.35237e-07
QEI	RLW	chr1.s_103638204	1	103638204	10.2885	0.5849	5.15109e-11
QEI	RLW	chr2.s_19207181	2	19207181	11.1379	0.6353	7.28558e-12
QEI	RLW	chr2.s_216139103	2	216139103	7.2362	0.4069	5.80823e-08
QEI	RLW	chr3.s_206100674	3	206100674	11.227	0.724	5.93493e-12
QEI	RLW	chr4.s_201805213	4	201805213	12.8754	0.7619	1.33369e-13
QEI	RLW	chr6.s_3080398	6	3080398	21.9012	1.2514	1.25784e-22
QEI	RLW	chr6.s_118969205	6	118969205	9.5445	0.5398	2.85681e-10
QEI	RLW	chr7.s_134903691	7	134903691	14.7725	0.8328	1.69069e-15
QEI	RLW	chr7.s_162091823	7	162091823	4.7898	0.2768	1.62304e-05
QQI	LL	chr1.s_3233674	1	3233674	8.5097	0.5918	3.85097e-10
QQI	LL	chr1.s_17724410	1	17724410	9.2252	0.3099	7.13294e-11
QQI	LL	chr1.s_29165514	1	29165514	5.3667	0.3773	6.65168e-07
QQI	LL	chr1.s_38976128	1	38976128	9.4063	0.5068	4.65702e-11
QQI	LL	chr1.s_39398013	1	39398013	12.3438	0.1874	4.72031e-14
QQI	LL	chr1.s_138028986	1	138028986	20.9841	0.4921	8.34969e-23
QQI	LL	chr1.s_161156193	1	161156193	24.1933	0.4346	4.8108e-26
QQI	LL	chr1.s_255244464	1	255244464	12.563	0.9372	2.82495e-14
QQI	LL	chr1.s_296365942	1	296365942	27.5908	0.657	1.80624e-29
QQI	LL	chr2.s_14521808	2	14521808	5.1945	0.4017	1.00395e-06
QQI	LL	chr2.s_14924981	2	14924981	19.8736	0.8201	1.10592e-21
QQI	LL	chr2.s_37364030	2	37364030	8.0324	0.145	1.18792e-09
QQI	LL	chr2.s_211377849	2	211377849	22.449	0.4569	2.77001e-24
QQI	LL	chr2.s_218159590	2	218159590	10.1869	0.433	7.43013e-12
QQI	LL	chr2.s_239080228	2	239080228	7.6404	0.5158	3.00007e-09
QQI	LL	chr3.s_24229121	3	24229121	26.7249	0.7104	1.34748e-28
QQI	LL	chr3.s_32102020	3	32102020	27.3468	0.5275	3.18214e-29
QQI	LL	chr3.s_164367833	3	164367833	57.1405	1.3086	3.5632e-59
QQI	LL	chr3.s_171674684	3	171674684	21.0411	0.503	7.31235e-23
QQI	LL	chr3.s_209020733	3	209020733	28.3499	0.6795	3.10374e-30
QQI	LL	chr3.s_215648677	3	215648677	10.0406	0.4845	1.0479e-11
QQI	LL	chr3.s_233000271	3	233000271	22.4373	0.4423	2.84587e-24
QQI	LL	chr4.s_162891966	4	162891966	22.6982	0.3377	1.55204e-24
QQI	LL	chr4.s_163363643	4	163363643	13.385	0.2488	4.12753e-15
QQI	LL	chr4.s_208054081	4	208054081	13.182	0.7225	6.63726e-15
QQI	LL	chr4.s_220419822	4	220419822	8.4087	0.5814	4.88613e-10
QQI	LL	chr4.s_238091310	4	238091310	5.7259	0.3931	2.82228e-07
QQI	LL	chr4.s_241646628	4	241646628	37.8178	0.686	9.17449e-40
QQI	LL	chr5.s_2865447	5	2865447	29.0646	0.9303	5.91422e-31
QQI	LL	chr5.s_7093332	5	7093332	11.8322	0.3266	1.56463e-13
QQI	LL	chr5.s_191018258	5	191018258	8.6818	0.4851	2.56603e-10
QQI	LL	chr5.s_212789635	5	212789635	19.5156	1.6649	2.54403e-21
QQI	LL	chr6.s_1745159	6	1745159	6.7157	0.4979	2.68084e-08
QQI	LL	chr6.s_51349350	6	51349350	36.1057	0.5344	4.83714e-38
QQI	LL	chr6.s_166089199	6	166089199	19.2283	1.41	4.96623e-21
QQI	LL	chr7.s_5404536	7	5404536	12.8282	0.8035	1.5188e-14
QQI	LL	chr7.s_28496944	7	28496944	21.7315	0.4163	1.46841e-23
QQI	LL	chr7.s_95576746	7	95576746	16.6384	0.4684	2.07269e-18
QQI	LL	chr7.s_119465948	7	119465948	7.4798	0.3333	4.38611e-09
QQI	LL	chr7.s_130481822	7	130481822	7.9202	0.4898	1.54837e-09
QQI	LL	chr7.s_164316104	7	164316104	8.0451	0.5367	1.15284e-09
QQI	LL	chr8.s_7172218	8	7172218	7.3738	0.3191	5.63684e-09
QQI	LL	chr8.s_17303893	8	17303893	12.1775	0.2417	6.96677e-14
QQI	LL	chr8.s_21360314	8	21360314	5.7727	0.4007	2.52425e-07
QQI	LL	chr8.s_128678594	8	128678594	13.7201	0.2934	1.88531e-15
QQI	LL	chr8.s_141407029	8	141407029	6.4536	0.3772	4.99459e-08
QQI	LL	chr8.s_164038170	8	164038170	10.8244	0.2031	1.66265e-12
QQI	LL	chr9.s_5078910	9	5078910	28.8691	0.5029	9.30904e-31
QQI	LL	chr9.s_14016822	9	14016822	16.0778	0.5401	7.66166e-18
QQI	LL	chr9.s_39945407	9	39945407	10.1487	0.1895	8.1265e-12
QQI	LL	chr9.s_87391267	9	87391267	18.4212	1.1955	3.25217e-20
QQI	LL	chr9.s_103112119	9	103112119	6.8504	0.5053	1.94779e-08
QQI	LL	chr9.s_109468254	9	109468254	23.2621	0.5506	4.18572e-25
QQI	LL	chr9.s_127177683	9	127177683	10.6382	0.2666	2.57407e-12
QQI	LL	chr9.s_130541146	9	130541146	9.7808	0.2498	1.92993e-11
QQI	LL	chr9.s_156103235	9	156103235	26.0308	0.4867	6.7483e-28
QQI	LL	chr9.s_157559256	9	157559256	7.7898	0.5567	2.1069e-09
QQI	LL	chr10.s_4190975	10	4190975	8.6498	0.5036	2.76748e-10
QQI	LL	chr10.s_125254804	10	125254804	10.0953	0.4603	9.2133e-12
QQI	LL	chr10.s_125371135	10	125371135	5.0856	0.3303	1.30276e-06
QQI	LL	chr10.s_142364965	10	142364965	6.1877	0.4329	9.39671e-08
QQI	LW	chr1.s_7067397	1	7067397	6.258	0.3553	7.95019e-08
QQI	LW	chr1.s_12359089	1	12359089	23.6214	0.368	1.81667e-25
QQI	LW	chr1.s_22267276	1	22267276	15.3606	0.8194	4.08473e-17
QQI	LW	chr1.s_34541157	1	34541157	19.9326	0.3447	9.63994e-22
QQI	LW	chr1.s_67312285	1	67312285	13.9985	0.9806	9.83483e-16
QQI	LW	chr1.s_95249003	1	95249003	75.9348	0.7357	4.9761e-78
QQI	LW	chr1.s_219089961	1	219089961	40.7505	0.5032	1.03264e-42
QQI	LW	chr1.s_225974928	1	225974928	6.389	0.2708	5.82271e-08
QQI	LW	chr1.s_255514192	1	255514192	8.3364	0.5166	5.79586e-10
QQI	LW	chr1.s_267273417	1	267273417	16.2965	0.9275	4.59989e-18
QQI	LW	chr1.s_269328264	1	269328264	12.8401	0.8531	1.47686e-14
QQI	LW	chr1.s_279276244	1	279276244	18.1371	0.568	6.30352e-20
QQI	LW	chr1.s_283055255	1	283055255	5.6556	0.2937	3.337e-07
QQI	LW	chr1.s_283077505	1	283077505	23.2146	0.8104	4.67456e-25
QQI	LW	chr2.s_14174707	2	14174707	10.0026	0.1855	1.14559e-11
QQI	LW	chr2.s_19968983	2	19968983	8.6987	0.557	2.466e-10
QQI	LW	chr2.s_28067860	2	28067860	11.3489	0.3549	4.85747e-13
QQI	LW	chr2.s_31392693	2	31392693	21.4612	0.8625	2.75288e-23
QQI	LW	chr2.s_34607457	2	34607457	30.3585	0.4799	2.94307e-32
QQI	LW	chr2.s_38437541	2	38437541	43.4603	0.5542	1.95166e-45
QQI	LW	chr2.s_197903305	2	197903305	5.8413	0.21	2.14363e-07
QQI	LW	chr2.s_219059276	2	219059276	15.474	0.6908	3.13502e-17
QQI	LW	chr2.s_221397553	2	221397553	13.2028	0.2075	6.32168e-15
QQI	LW	chr3.s_964324	3	964324	10.9891	0.3539	1.12972e-12
QQI	LW	chr3.s_114791459	3	114791459	11.4922	0.5729	3.47148e-13
QQI	LW	chr3.s_115442149	3	115442149	6.5121	0.4682	4.34649e-08
QQI	LW	chr3.s_141238146	3	141238146	9.9461	0.6869	1.30848e-11
QQI	LW	chr3.s_196246101	3	196246101	11.5533	0.3992	3.0079e-13
QQI	LW	chr3.s_221273042	3	221273042	7.425	0.4893	4.9933e-09
QQI	LW	chr3.s_221505569	3	221505569	12.0983	0.3392	8.38793e-14
QQI	LW	chr4.s_24594356	4	24594356	8.2878	0.1876	6.50036e-10
QQI	LW	chr4.s_77745452	4	77745452	28.9095	0.6183	8.47535e-31
QQI	LW	chr4.s_168928548	4	168928548	23.2759	1.279	4.05369e-25
QQI	LW	chr4.s_178306190	4	178306190	15.864	0.6331	1.26164e-17
QQI	LW	chr4.s_242706950	4	242706950	13.7571	0.4154	1.72913e-15
QQI	LW	chr5.s_77129957	5	77129957	12.6684	0.1896	2.20749e-14
QQI	LW	chr5.s_83049921	5	83049921	25.4708	1.2917	2.47624e-27
QQI	LW	chr5.s_196487640	5	196487640	11.4406	0.195	3.9176e-13
QQI	LW	chr5.s_213836244	5	213836244	17.8654	1.3919	1.18712e-19
QQI	LW	chr5.s_222482035	5	222482035	17.0153	0.8389	8.60793e-19
QQI	LW	chr6.s_47339673	6	47339673	16.3178	0.2377	4.37679e-18
QQI	LW	chr6.s_75122208	6	75122208	26.189	0.5583	4.67419e-28
QQI	LW	chr6.s_100160116	6	100160116	11.634	0.2868	2.48957e-13
QQI	LW	chr6.s_116447151	6	116447151	4.3645	0.2191	7.35583e-06
QQI	LW	chr6.s_119169191	6	119169191	7.7001	0.3781	2.60463e-09
QQI	LW	chr6.s_164208066	6	164208066	8.6192	0.229	2.97405e-10
QQI	LW	chr6.s_166161392	6	166161392	6.0099	0.3294	1.43468e-07
QQI	LW	chr7.s_46352195	7	46352195	5.6241	0.2264	3.59779e-07
QQI	LW	chr7.s_175011450	7	175011450	10.6269	0.7412	2.64355e-12
QQI	LW	chr7.s_177750897	7	177750897	43.1399	0.8577	4.09645e-45
QQI	LW	chr8.s_170472283	8	170472283	24.0561	0.6966	6.61635e-26
QQI	LW	chr8.s_174857070	8	174857070	12.3351	0.5512	4.81672e-14
QQI	LW	chr9.s_19434530	9	19434530	6.699	0.4123	2.78894e-08
QQI	LW	chr9.s_105330723	9	105330723	14.8707	0.4335	1.28203e-16
QQI	LW	chr9.s_116829308	9	116829308	6.0592	0.3339	1.27565e-07
QQI	LW	chr9.s_154011586	9	154011586	5.1025	0.3234	1.25109e-06
QQI	LW	chr10.s_93175544	10	93175544	10.0055	0.3406	1.13788e-11
QQI	LW	chr10.s_144446052	10	144446052	11.8898	0.446	1.3671e-13
QQI	RLW	chr1.s_8497397	1	8497397	7.498	0.4778	4.20116e-09
QQI	RLW	chr1.s_20032464	1	20032464	75.8359	1.3414	6.25274e-78
QQI	RLW	chr1.s_22267945	1	22267945	11.245	0.4891	6.19791e-13
QQI	RLW	chr1.s_38976312	1	38976312	12.8269	0.5235	1.52339e-14
QQI	RLW	chr1.s_71837699	1	71837699	5.11	0.2368	1.22887e-06
QQI	RLW	chr1.s_190422351	1	190422351	15.1074	0.296	7.37615e-17
QQI	RLW	chr1.s_248271142	1	248271142	12.7284	0.5185	1.91829e-14
QQI	RLW	chr1.s_281356355	1	281356355	21.5478	0.6428	2.25092e-23
QQI	RLW	chr1.s_286209015	1	286209015	4.0394	0.2131	1.61111e-05
QQI	RLW	chr1.s_293290973	1	293290973	17.9229	0.5514	1.03821e-19
QQI	RLW	chr1.s_296364197	1	296364197	3.5808	0.2063	4.89203e-05
QQI	RLW	chr1.s_302189296	1	302189296	14.8493	0.4325	1.34783e-16
QQI	RLW	chr2.s_13637515	2	13637515	10.2447	0.4889	6.48591e-12
QQI	RLW	chr2.s_26280031	2	26280031	21.6488	0.43	1.77955e-23
QQI	RLW	chr2.s_38437541	2	38437541	29.219	0.3207	4.13386e-31
QQI	RLW	chr2.s_163306171	2	163306171	30.9349	0.8232	7.73221e-33
QQI	RLW	chr2.s_194741181	2	194741181	21.8746	0.463	1.05284e-23
QQI	RLW	chr2.s_194929404	2	194929404	15.561	0.6836	2.55892e-17
QQI	RLW	chr2.s_226467075	2	226467075	10.4149	0.6036	4.34899e-12
QQI	RLW	chr3.s_7301085	3	7301085	4.0731	0.2362	1.48492e-05
QQI	RLW	chr3.s_8286079	3	8286079	13.8162	0.2994	1.50627e-15
QQI	RLW	chr3.s_111750660	3	111750660	11.8878	0.2142	1.37359e-13
QQI	RLW	chr3.s_114796636	3	114796636	36.5066	1.2678	1.91127e-38
QQI	RLW	chr3.s_153596312	3	153596312	11.6859	0.343	2.20449e-13
QQI	RLW	chr4.s_5878661	4	5878661	21.5809	0.3652	2.08406e-23
QQI	RLW	chr4.s_17250490	4	17250490	27.118	0.6334	5.41137e-29
QQI	RLW	chr4.s_126960732	4	126960732	9.6579	0.3393	2.57665e-11
QQI	RLW	chr4.s_195502316	4	195502316	5.3582	0.3412	6.78709e-07
QQI	RLW	chr5.s_8016584	5	8016584	38.8372	1.031	8.66086e-41
QQI	RLW	chr5.s_54309336	5	54309336	13.3551	0.2066	4.42651e-15
QQI	RLW	chr5.s_60563975	5	60563975	10.2882	0.4624	5.85679e-12
QQI	RLW	chr5.s_140469353	5	140469353	20.0561	0.4517	7.232e-22
QQI	RLW	chr6.s_108551216	6	108551216	13.1193	0.2342	7.68438e-15
QQI	RLW	chr6.s_162390684	6	162390684	15.5689	0.7499	2.51187e-17
QQI	RLW	chr6.s_165731678	6	165731678	10.6019	0.5696	2.80342e-12
QQI	RLW	chr7.s_6344372	7	6344372	29.1291	0.7444	5.09241e-31
QQI	RLW	chr7.s_15909091	7	15909091	8.3658	0.2209	5.40642e-10
QQI	RLW	chr7.s_16475919	7	16475919	12.4326	0.1837	3.83383e-14
QQI	RLW	chr7.s_21929163	7	21929163	5.0149	0.2423	1.54285e-06
QQI	RLW	chr7.s_97213607	7	97213607	10.4438	0.6534	4.06366e-12
QQI	RLW	chr7.s_168603837	7	168603837	8.197	0.2914	8.05345e-10
QQI	RLW	chr7.s_169296517	7	169296517	17.4825	0.3124	2.89657e-19
QQI	RLW	chr7.s_177750145	7	177750145	17.6778	0.3436	1.83783e-19
QQI	RLW	chr8.s_13722144	8	13722144	18.4833	0.8015	2.81397e-20
QQI	RLW	chr8.s_14171542	8	14171542	97.2636	1.2505	2.06695e-99
QQI	RLW	chr8.s_89760654	8	89760654	10.8107	0.4388	1.71717e-12
QQI	RLW	chr8.s_142593840	8	142593840	23.2163	0.3192	4.65631e-25
QQI	RLW	chr8.s_175353278	8	175353278	13.0906	0.3651	8.21823e-15
QQI	RLW	chr9.s_80352847	9	80352847	12.7322	0.2136	1.90134e-14
QQI	RLW	chr9.s_81787853	9	81787853	12.8006	0.3078	1.61994e-14
QQI	RLW	chr9.s_96266392	9	96266392	13.4852	0.3665	3.26555e-15
QQI	RLW	chr9.s_116222911	9	116222911	24.5106	0.5655	2.30238e-26
QQI	RLW	chr9.s_124158308	9	124158308	20.3538	1.1745	3.61816e-22
QQI	RLW	chr9.s_152187417	9	152187417	11.0908	0.2227	8.89824e-13
QQI	RLW	chr9.s_154128970	9	154128970	26.9641	0.9436	7.73347e-29
QQI	RLW	chr10.s_10858629	10	10858629	30.4929	1.0688	2.15506e-32
QQI	RLW	chr10.s_79471739	10	79471739	7.4544	0.3209	4.65709e-09
QQI	RLW	chr10.s_85134199	10	85134199	22.4363	0.3906	2.85254e-24
QQI	RLW	chr10.s_97771165	10	97771165	19.0851	0.287	6.93047e-21
QQI	RLW	chr10.s_103653450	10	103653450	9.1586	0.1521	8.34542e-11
QQI	RLW	chr10.s_120809969	10	120809969	7.2188	0.4512	8.13538e-09

## Sheet: Appendix I
Appendix I. Summary of QTL and their chromosomal distribution identified by BSA for LL and LW.
Trait	Chr	start	end	length	nSNPs	avgSNPs_Mb	peakDeltaSNP	posPeakDeltaSNP	avgDeltaSNP	maxGprime	posMaxGprime	meanGprime	sdGprime	AUCaT	meanPval	meanQval
LL	Chr1	42503484	44694614	2191130	184	84	0.00557179294108492	42503484	0.00494700525399152	3.08981968704926	43088193	3.05769124018202	0.0183049703034208	76340.5643611187	0.000349864032825858	0.00816030051526301
LL	Chr2	233157688	244349609	11191921	873	78	-0.0116929	244349609	-0.00349187	3.41919788464663	236707289	3.28006408823701	0.110261173752863	2475950.35667186	5.1569525925851e-05	0.00187946348861658
LL	Chr4	46471996	46471996	0	1	NO	0.0380565647458557	46471996	0.0380565647458557	3.03138880144126	46471996	3.03138880144126	NA	0	0.000466395110100826	0.00987942132385291
LL	Chr4	168704232	178796936	10092704	627	62	0.0267880650113636	177498144	0.0254875826836001	3.09054907504191	177498144	3.06686832777884	0.0163844150413072	408431.983391731	0.000312805720394393	0.00766158621872678
LL	Chr4	208472657	232600092	24127435	1856	77	0.0160450941626801	208472657	0.00477085710111211	3.6319872676589	223707923	3.2320117061549	0.183557678928145	5822517.69160646	0.00014793328643562	0.00397864493660038
LL	Chr6	58716351	62203538	3487187	126	36	0.0136735216689433	62203538	0.00529579992352786	3.13372811668532	59804042	3.07963901888912	0.0285360560492916	189168.25167357	0.000277722787556665	0.00706496292560852
LL	Chr6	84803471	94468615	9665144	648	67	0.0183225754568202	84803471	0.013900896232671	3.31254520740118	92408018	3.24675133262023	0.0739695805903916	1955929.74621294	5.83818130440784e-05	0.00204097797677896
LL	Chr7	14275	11175540	11161265	477	43	-0.0140617	14275	-0.0134984	5.01250358933711	14275	4.3389254612149	0.539439922832887	11782589.3303028	1.21213594423863e-05	0.000319979937726991
LL	Chr10	269638	8774048	8504410	730	86	0.0365151760200692	8774048	0.0303991641766172	3.6764926027297	269638	3.58186802128449	0.108239957695246	4109293.74698081	4.53388070903662e-06	0.000197795401625499
LL	Chr10	136276054	143303710	7027656	227	32	0.0253962482497845	141653515	0.0204837991850721	3.1536866084322	141399674	3.09323718230648	0.039016269452469	563968.493762134	0.000249213156185798	0.00668801140421267
LW	Chr1	16632696	25967458	9334762	7877	844	-0.125703	19214668	-0.11043	4.06159405076314	19214668	3.94907554354881	0.0996988490770061	2071243.82737488	0.00123135759812251	0.0322699203406639
LW	Chr6	33960401	99522048	65561647	69500	1060	0.214287795487138	59826512	0.195767101616482	5.21930991150438	59826512	4.74276402346883	0.294986919659248	65038149.3617273	0.000267094217218655	0.0105672955402461

## Sheet: Appendix J
Appendix J. Significant SNPs and candidate genes from GWAS and BSA co-location for maize leaf morphology.
	Chr.	qtl	Start	End	Length	Co-LOCATED	Co-QTNs	Chr.	Pos	Model/Method	Trait	Gene
LL	Chr1	1	42503484	44694614	2191130	NO
	Chr2	2	233157688	244349609	11191921	3	chr2.s_239080228	2	239080228	3V_QQI	LL	Zm00001d007759
												Zm00001d007760
							chr2.s_239428681	2	239428681	3V_Single	YY_LL	Zm00001d007774
												Zm00001d007775
												Zm00001d007777
												Zm00001d007778
												Zm00001d007780
												Zm00001d007776
							chr2.s_244255386	2	244255386	3V_Single	YY_LL	Zm00001d007961
												Zm00001d007962
												Zm00001d007963
												Zm00001d007964
												Zm00001d007965
	Chr4	3	46471996	46471996	0	NO
	Chr4	4	168704232	178796936	10092704	NO
	Chr4	5	208472657	232600092	24127435	3	chr4.s_212087026	4	212087026	3V_Single	YY_LL	Zm00001d053068
							chr4.s_220419822	4	220419822	3V_QQI	LL	Zm00001d053212
												Zm00001d053213
												Zm00001d053214
	Chr6	6	58716351	62203538	3487187	NO
	Chr6	7	84803471	94468615	9665144	1	chr6.s_91585432	6	91585432	3V_Single	YY_LL	Zm00001d036545
												Zm00001d036546
												Zm00001d036547
	Chr7	8	14275	11175540	11161265	NO
	Chr10	9	269638	8774048	8504410	6	chr10.s_4190975	10	4190975	3V_QQI	LL	Zm00001d023368
												Zm00001d023369
												Zm00001d023370
												Zm00001d023371
												Zm00001d023367
												Zm00001d023372
												Zm00001d023373
							chr10.s_6445999	10	6445999	3V_Single	ZY_LL	Zm00001d023465
												Zm00001d023466
	Chr10	10	136276054	143303710	7027656	3	chr10.s_142364965	10	142364965	3V_Single	YY_LL	Zm00001d026262
										3V_QQI	LL	Zm00001d026263
												Zm00001d026265
												Zm00001d026266
												Zm00001d026268
												Zm00001d026269
												Zm00001d026267
							chr10.s_142768522	10	142768522	3V_Single	LL_BLUP	Zm00001d026278
												Zm00001d026279
												Zm00001d026280
												Zm00001d026282
												Zm00001d026283
												Zm00001d026284
												Zm00001d026277
												Zm00001d026281
LW	Chr1	11	16632696	25967458		5	chr1.s_22267276	1	22267276	3V_Single	LW_BLUP	Zm00001d028083
										3V_QQI	LW	Zm00001d028084
	Chr6	12	33960401	99522048		10	chr2.s_34607457	2	34607457	3V_Single	YY_LW	Zm00001d003175
										3V_QQI	LW	Zm00001d003176
							chr2.s_38437541	2	38437541	3V_QQI	LW	Zm00001d003267
												Zm00001d003268
												Zm00001d003269
												Zm00001d003271
												Zm00001d003272
							chr2.s_45757480	2	45757480	3V_Single	YY_LW	Zm00001d003488
												Zm00001d003489

## Sheet: Appendix K
Appendix K. Haplotype information of Zm00001d026262.
Zm00001d026262	chr10.s_142338703	chr10.s_142338636	chr10.s_142338637	chr10.s_142338670	Average(cm)
Hap1	T	A	T	T	71.13
Hap2	A	T	A	C	66.33

## Sheet: Appendix M
Appendix M. Haplotype information of Zm00001d026269.
Zm00001d026269	chr10.s_142367720	chr10.s_142366964	chr10.s_142363552	chr10.s_142366528	chr10.s_142362607	chr10.s_142367453	chr10.s_142364965	Average(cm)
Hap1	A	A	T	T	G	C	G	72.09
Hap2	A	G	C	C	A	T	T	68.12
Hap3	G	G	C	C	A	T	T	67.49
Hap4	A	A	T	T	G	C	T	68.87

[truncated: 1 more sheets: Appendix N]
