# Supplementary material
Source: Research Square preprint supplement (doi:10.21203/rs.3.rs-8695625/v1)
Supplement: Supplementary file 1 [file c6b97ab87e86b2e192e7ca9b.docx]

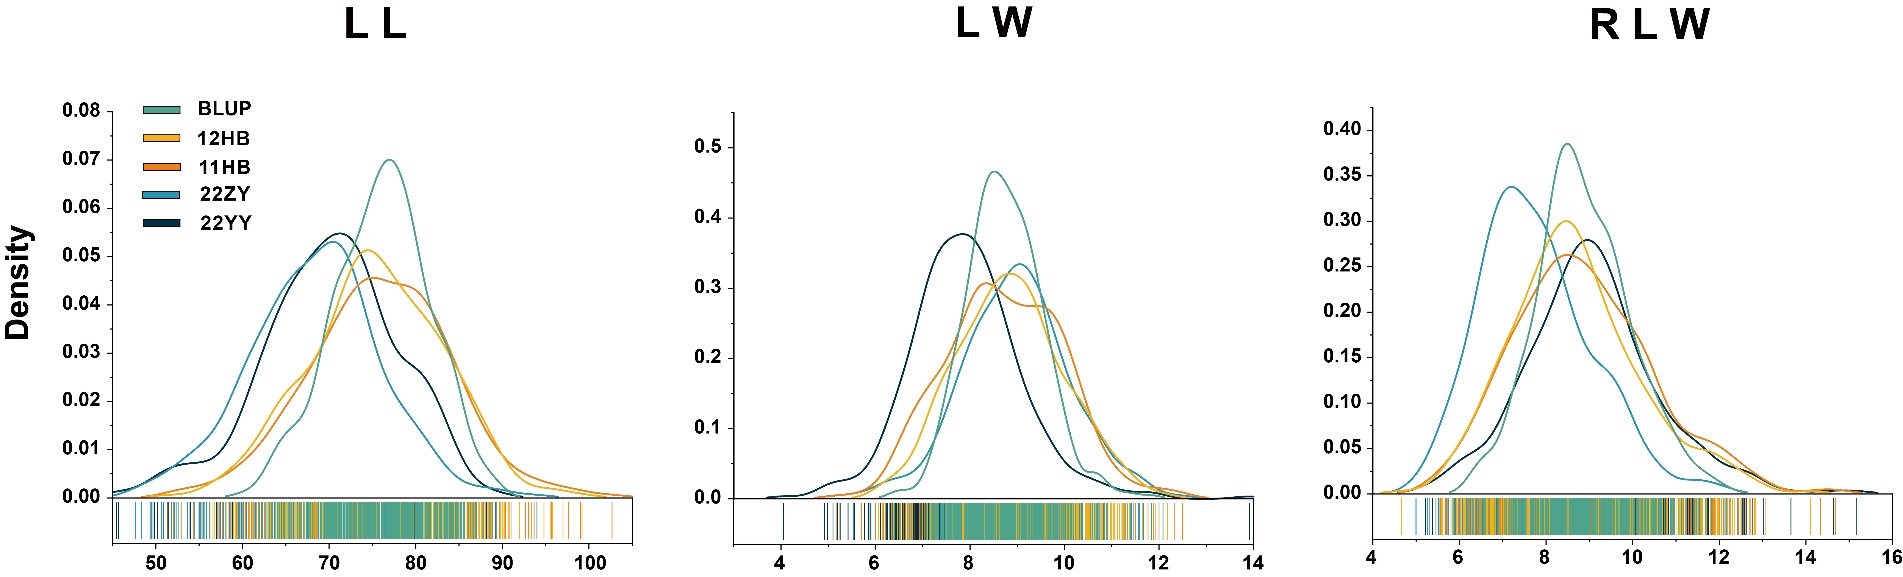


**Appendix D. Density distribution of leaf morphological traits across environments and and their best linear unbiased predictor (BLUP) values**. (A) Leaf length (LL). (B) Leaf width (LW). (C) Ratio of leaf length to width (RLW).


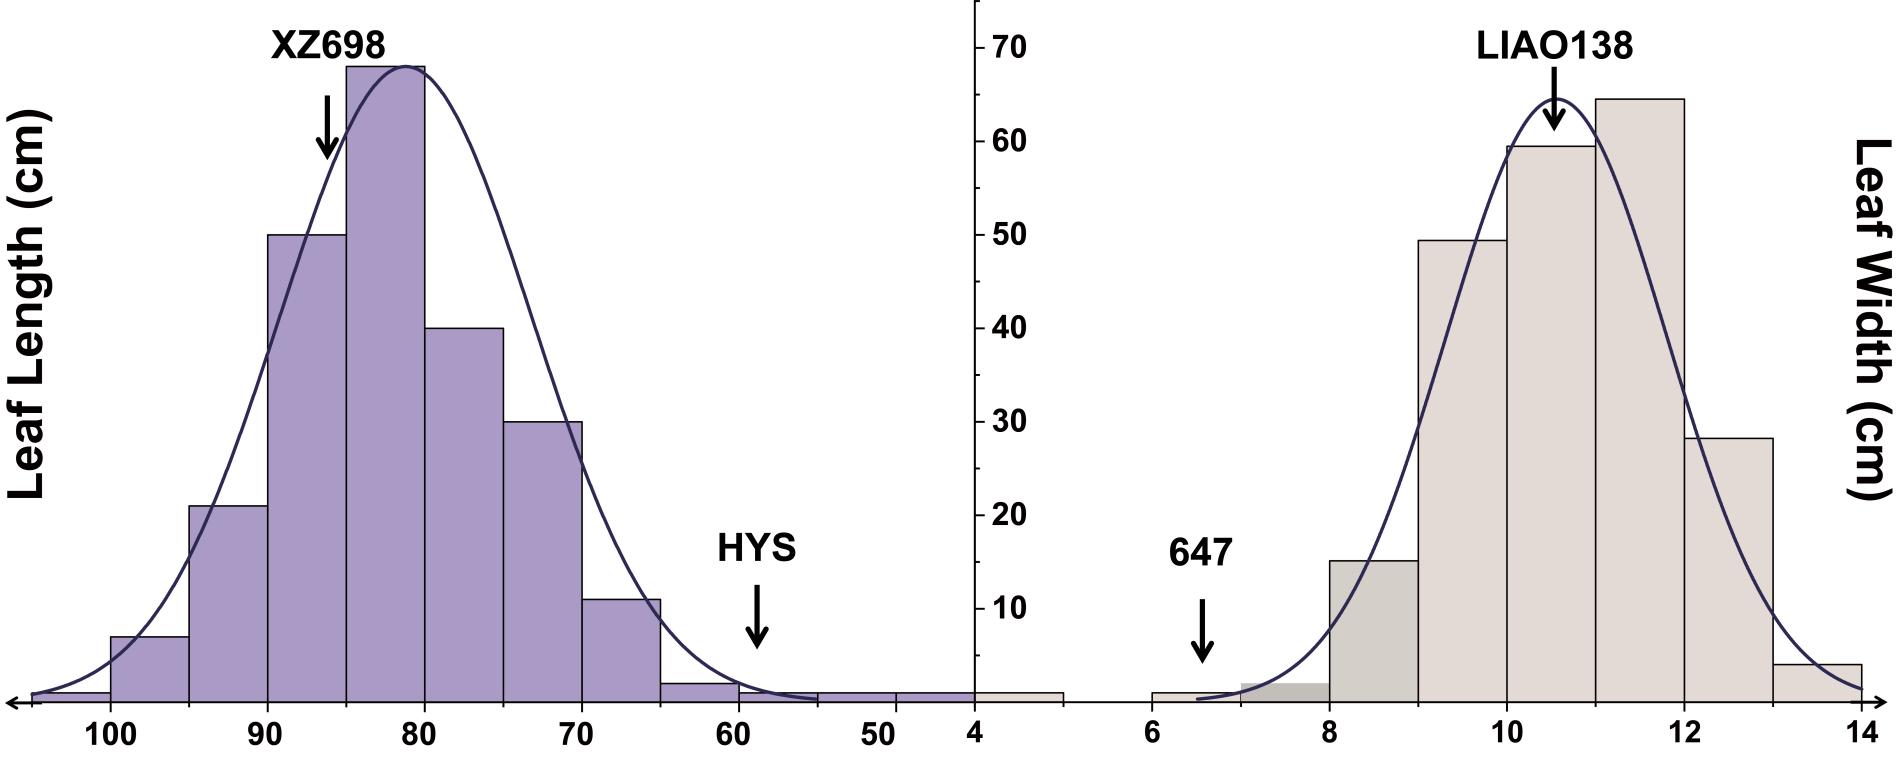


**Appendix H. Phenotypic distributions of leaf length and width in the F₂ mapping population.** (A) Frequency distribution of leaf length (LL, cm). The purple histogram represents observed phenotypic counts, overlaid with a density curve. Arrows indicate the parental lines XZ698 (long-leaf) and HYS (short-leaf). (B) Frequency distribution of leaf width (LW, cm). The gray histogram represents phenotypic counts, overlaid with a density curve. Arrows indicate the parental lines LIAO138 (wide-leaf) and 647 (narrow-leaf).


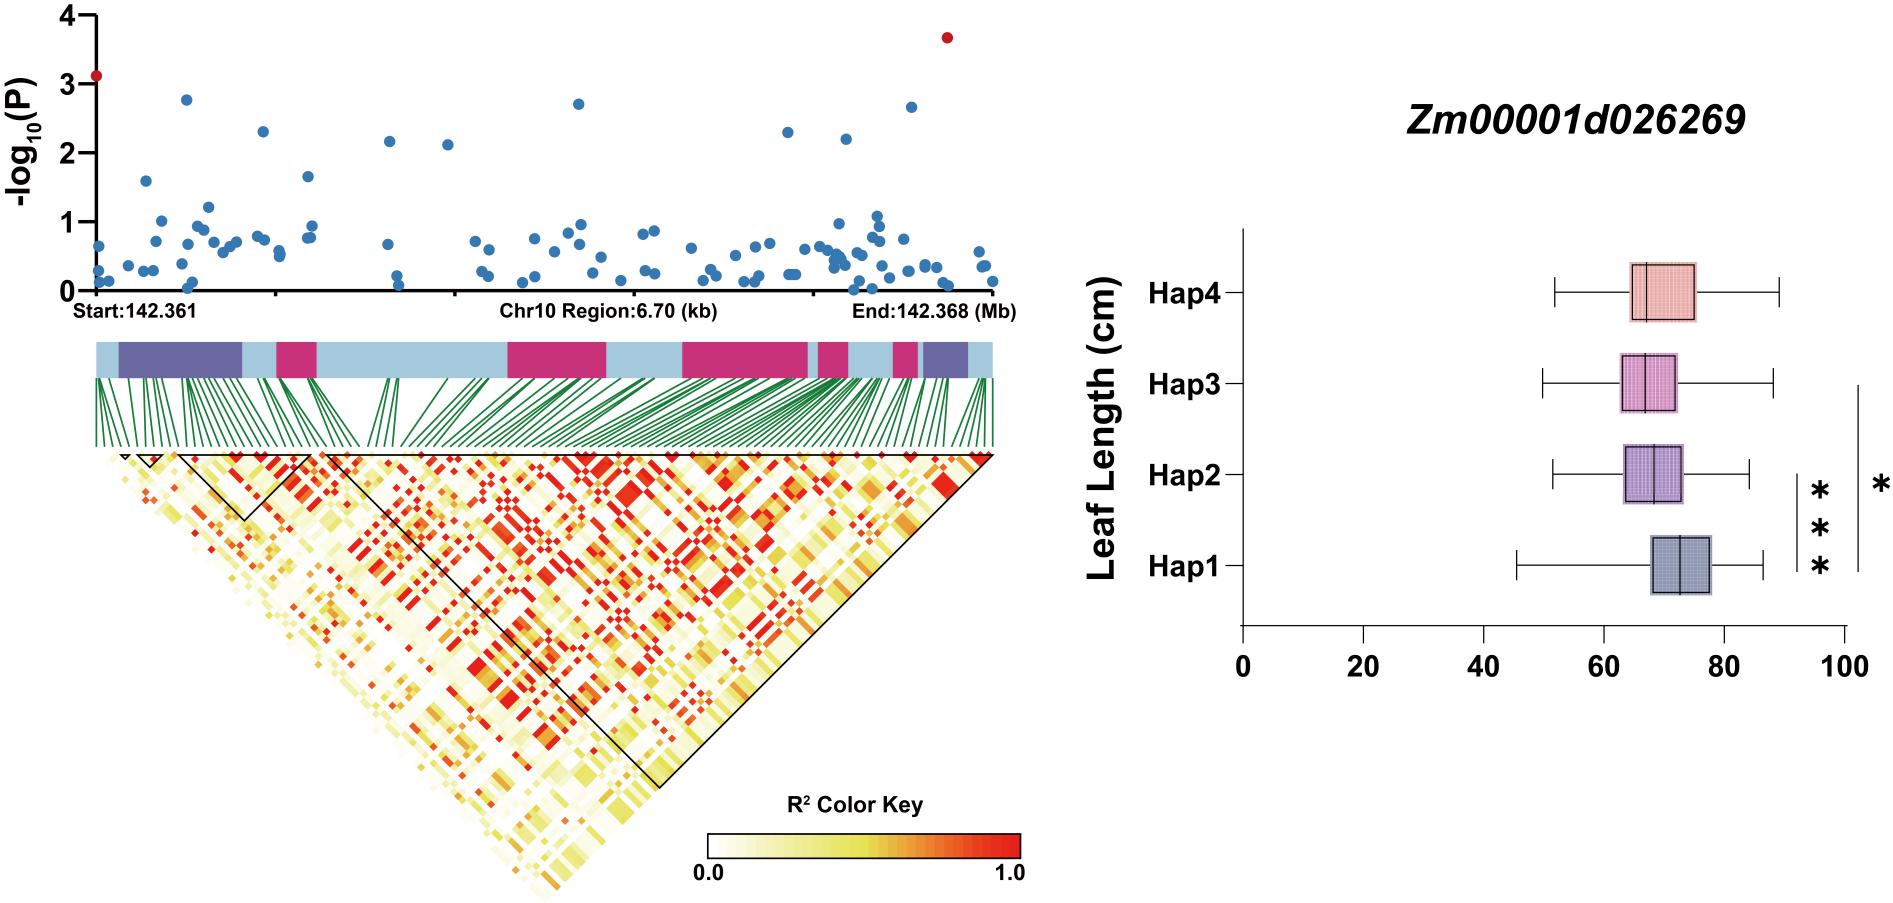


**Appendix L. Candidate gene association analysis of *Zm00001d026269* for leaf length (LL) in maize**. (A) Linkage disequilibrium (LD) heatmap showing pairwise R² values among SNPs in the genomic region; the color scale indicates LD strength. (B) Haplotype analysis of *Zm00001d026269*. Violin plots compare LL (cm) between Hap1 and Hap2, with asterisks denoting a statistically significant difference.


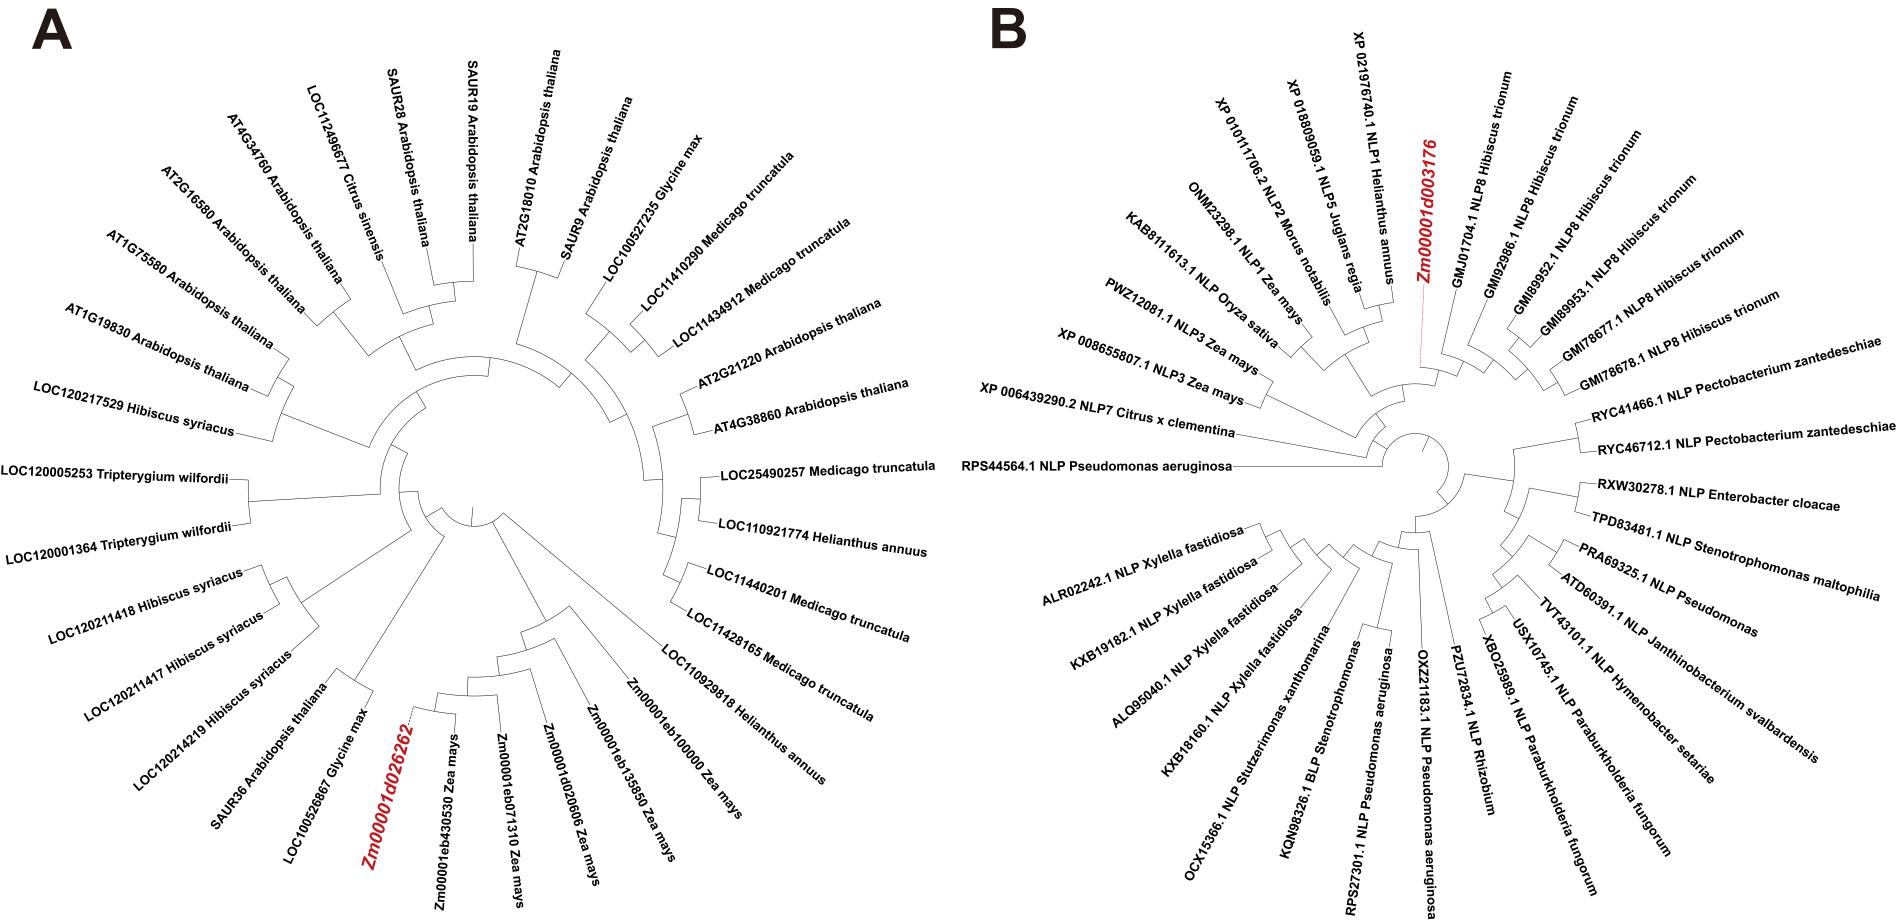


**Appendix O. Phylogenetic analysis of candidate genes.** (A) Evolutionary relationships of *Zm00001d026262* and its homologs. (B) Evolutionary relationships of *Zm00001d003176* and its orthologs from selected species, including *Zea mays*, *Helianthus annuus* and *Pseudomonas aeruginosa*.
